# Supplementary material
Source: PubMed Central journal article supplement (PMC2711007)
Supplement: NIHMS95479-supplement-SI.pdf [file NIHMS95479-supplement-SI.pdf]

# Supporting Information

## A Hierarchy of Homodesmotic Reactions for Thermochemistry

Steven E. Wheeler,<sup>§,1</sup> Kendall N. Houk,<sup>§,2</sup> Paul v. R. Schleyer,<sup>‡</sup> and Wesley D. Allen<sup>‡,3</sup>

<sup>§</sup>*Department of Chemistry and Biochemistry, University of California, Los Angeles, CA 90095*

<sup>‡</sup>*Center for Computational Chemistry and Department of Chemistry, University of Georgia, Athens, GA 30602*

| Contents                                                                                                        | Page |
|-----------------------------------------------------------------------------------------------------------------|------|
| Complete citation of refs 106, 107, 110                                                                         | S2   |
| Reaction energies for each species, for each reaction type                                                      | S4   |
| Comparison of FPA, G3, and CBS-QB3 reaction energies                                                            | S23  |
| Valence focal point tables for Isodesmic bond separation reactions of 1,3,5-hexatriyne and 1,3,5,7-octatetrayne | S30  |
| Asymptotic analysis of polyynes enthalpies of formation (Figs. S1 and S2)                                       | S31  |
| Absolute energies of all computed species                                                                       | S32  |
| Optimized Cartesian coordinates (Å) for all species                                                             | S39  |

---

<sup>1</sup> Electronic mail: [swheele2@chem.ucla.edu](mailto:swheele2@chem.ucla.edu)

<sup>2</sup> Electronic mail: [houk@chem.ucla.edu](mailto:houk@chem.ucla.edu)

<sup>3</sup> Electronic mail: [wdallen@uga.edu](mailto:wdallen@uga.edu)

### Complete citations for refs 106, 107, and 110:

Gaussian 03, Revision C.02, Frisch, M. J.; Trucks, G. W.; Schlegel, H. B.; Scuseria, G. E.; Robb, M. A.; Cheeseman, J. R.; Montgomery, Jr., J. A.; Vreven, T.; Kudin, K. N.; Burant, J. C.; Millam, J. M.; Iyengar, S. S.; Tomasi, J.; Barone, V.; Mennucci, B.; Cossi, M.; Scalmani, G.; Rega, N.; Petersson, G. A.; Nakatsuji, H.; Hada, M.; Ehara, M.; Toyota, K.; Fukuda, R.; Hasegawa, J.; Ishida, M.; Nakajima, T.; Honda, Y.; Kitao, O.; Nakai, H.; Klene, M.; Li, X.; Knox, J. E.; Hratchian, H. P.; Cross, J. B.; Bakken, V.; Adamo, C.; Jaramillo, J.; Gomperts, R.; Stratmann, R. E.; Yazyev, O.; Austin, A. J.; Cammi, R.; Pomelli, C.; Ochterski, J. W.; Ayala, P. Y.; Morokuma, K.; Voth, G. A.; Salvador, P.; Dannenberg, J. J.; Zakrzewski, V. G.; Dapprich, S.; Daniels, A. D.; Strain, M. C.; Farkas, O.; Malick, D. K.; Rabuck, A. D.; Raghavachari, K.; Foresman, J. B.; Ortiz, J. V.; Cui, Q.; Baboul, A. G.; Clifford, S.; Cioslowski, J.; Stefanov, B. B.; Liu, G.; Liashenko, A.; Piskorz, P.; Komaromi, I.; Martin, R. L.; Fox, D. J.; Keith, T.; Al-Laham, M. A.; Peng, C. Y.; Nanayakkara, A.; Challacombe, M.; Gill, P. M. W.; Johnson, B.; Chen, W.; Wong, M. W.; Gonzalez, C.; and Pople, J. A.; Gaussian, Inc., Wallingford CT, 2004.

MOLPRO, version 2006.1, is a package of ab initio programs written by H.-J. Werner, P. J. Knowles, R. Lindh, F. R. Manby, M. Schütz, P. Celani, T. Korona, G. Rauhut, R. D. Amos, A. Bernhardsson, A. Berning, D. L. Cooper, M. J. O. Deegan, A. J. Dobbyn, F. Eckert, C. Hampel, G. Hetzer, A. W. Lloyd, S. J. McNicholas, W. Meyer, M. E. Mura, A. Nicklaß, P. Palmieri, R. Pitzer, U. Schumann, H. Stoll, A. J. Stone, R. Tarroni, and T. Thorsteinsson.

E. J. Bylaska, W. A. de Jong, K. Kowalski, T. P. Straatsma, M. Valiev, D. Wang, E. Aprà, T. L. Windus, S. Hirata, M. T. Hackler, Y. Zhao, P.-D. Fan, R. J. Harrison, M. Dupuis, D. M. A. Smith, J. Nieplocha, V. Tipparaju, M. Krishnan, A. A. Auer, M. Nooijen, E. Brown, G. Cisneros, G. I. Fann, H. Früchtl, J. Garza, K. Hirao, R. Kendall, J. A. Nichols, K. Tsemekhman, K. Wolinski, J. Anchell, D. Bernholdt, P. Borowski, T. Clark, D. Clerc, H. Dachsel, M. Deegan, K. Dylla, D. Elwood, E. Glendening, M. Gutowski, A. Hess, J. Jaffe, B. Johnson, J. Ju, R. Kobayashi, R. Kutteh, Z. Lin, R. Littlefield, X. Long, B. Meng, T. Nakajima, S. Niu, L. Pollack, M. Rosing, G. Sandrone, M. Stave, H. Taylor, G. Thomas, J. van Lenthe, A. Wong, and Z. Zhang, "NWChem, A Computational Chemistry Package for Parallel Computers, Version 5.0" (2006), Pacific Northwest National Laboratory, Richland, Washington 99352-0999, USA.

| <b>Molecule</b> |                    | <b>Molecule</b> |                      |
|-----------------|--------------------|-----------------|----------------------|
| <b>1</b>        | 1,3-cyclohexadiene | <b>35</b>       | 1,3-pentadiene       |
| <b>2</b>        | 1,3-hexadiene      | <b>36</b>       | 1,3-pentadiyne       |
| <b>3</b>        | 1,3-hexadiyne      | <b>37</b>       | 1,4-pentadiene       |
| <b>5</b>        | 1,4-hexadiene      | <b>38</b>       | 1,4-pentadiyne       |
| <b>6</b>        | 1,4-hexadiyne      | <b>39</b>       | penta-1-ene-3-yne    |
| <b>7</b>        | 2-butene           | <b>40</b>       | penta-1-ene-4-yne    |
| <b>8</b>        | 2-pentene          | <b>41</b>       | penta-1-yne-3-ene    |
| <b>9</b>        | 2-pentyne          | <b>42</b>       | 2,4-hexadiene        |
| <b>10</b>       | hexa-1-ene-3-yne   | <b>43</b>       | 2,4-hexadiyne        |
| <b>11</b>       | hexa-1-ene-4-yne   | <b>44</b>       | hexa-2-ene-4-yne     |
| <b>12</b>       | hexa-1-yne-3-ene   | <b>45</b>       | 1,2,3-hexatriene     |
| <b>13</b>       | hexa-1-yne-4-ene   | <b>46</b>       | 1,2,3-pentatriene    |
| <b>14</b>       | propane            | <b>47</b>       | E-2,3,4-hexatriene   |
| <b>15</b>       | propene            | <b>48</b>       | Z-2,3,4-hexatriene   |
| <b>16</b>       | propyne            | <b>49</b>       | 1,5-hexadiene        |
| <b>17</b>       | ethane             | <b>50</b>       | 1,5-hexadiyne        |
| <b>18</b>       | 1,3-butadiene      | <b>51</b>       | Hexa-1-ene-5-yne     |
| <b>19</b>       | 1,3-butadiyne      | <b>52</b>       | cyclopentadiene      |
| <b>20</b>       | allene             | <b>53</b>       | 2-ethyl-1-butene     |
| <b>21</b>       | butatriene         | <b>54</b>       | 2-methyl-1-pentene   |
| <b>22</b>       | ethene             | <b>55</b>       | 2-methyl-2-pentene   |
| <b>23</b>       | vinylacetylene     | <b>56</b>       | 2-methylpentane      |
| <b>24</b>       | methane            | <b>57</b>       | 3-methylpentane      |
| <b>25</b>       | butane             | <b>58</b>       | E-3-methyl-2-pentene |
| <b>26</b>       | acetylene          | <b>59</b>       | Z-3-methyl-2-pentene |
| <b>29</b>       | pentane            | <b>60</b>       | 2-methylpropene      |
| <b>30</b>       | 2-butyne           | <b>61</b>       | 2-methyl-1-butene    |
| <b>31</b>       | 1-butyne           | <b>62</b>       | 2-methyl-2-butene    |
| <b>32</b>       | 1-butene           | <b>63</b>       | Isobutene            |
| <b>33</b>       | 1-pentene          | <b>64</b>       | Isopentane           |
| <b>34</b>       | 1-pentyne          | <b>65</b>       | H <sub>2</sub>       |

**Table S1.** Reaction energies (kcal mol<sup>-1</sup>) for prototype hypohomodesmotic reactions.

| Reaction                      |      | B3LYP<br>6-31G(d) | M05-2X<br>6-31G(d) | M06<br>6-31G(d) | M06-2X<br>6-31G(d) | HF<br>cc-pVDZ | HF<br>cc-pVTZ | HF<br>cc-pVQZ | HF<br>cc-pV5Z | HF<br>CBS limit | MP2<br>cc-pVDZ |
|-------------------------------|------|-------------------|--------------------|-----------------|--------------------|---------------|---------------|---------------|---------------|-----------------|----------------|
| <b>18+17</b> → 2( <b>15</b> ) | (17) | 4.66              | 3.85               | 4.04            | 3.71               | 3.00          | 2.91          | 2.83          | 2.80          | 2.78            | 4.04           |
| <b>19+17</b> → 2( <b>16</b> ) | (18) | 3.46              | 0.70               | 2.03            | 0.80               | -3.30         | -3.60         | -3.86         | -3.94         | -3.96           | 1.23           |
| <b>23+17</b> → <b>15+16</b>   | (19) | 2.12              | 0.96               | 1.18            | 0.92               | -0.41         | -0.59         | -0.74         | -0.79         | -0.81           | 1.18           |
| <b>18+16</b> → <b>23+15</b>   | (20) | 2.54              | 2.89               | 2.87            | 2.78               | 3.40          | 3.51          | 3.57          | 3.58          | 3.59            | 2.86           |
| <b>21+22</b> → 2( <b>20</b> ) | (21) | 1.80              | 0.21               | 0.96            | 0.27               | -0.63         | -0.65         | -0.67         | -0.65         | -0.64           | 2.35           |
| <b>18+19</b> → 2( <b>23</b> ) | (22) | 3.88              | 2.63               | 3.71            | 2.66               | 0.51          | 0.50          | 0.45          | 0.43          | 0.44            | 2.92           |
| <b>19+15</b> → <b>23+16</b>   | (23) | 1.34              | -0.26              | 0.85            | -0.12              | -2.89         | -3.01         | -3.12         | -3.15         | -3.15           | 0.06           |

  

| Reaction                      |      | MP2<br>cc-pVTZ | MP2<br>cc-pVQZ | MP2<br>cc-pV5Z | MP2<br>CBS limit | CCSD<br>cc-pVDZ | CCSD<br>cc-pVTZ | CCSD(T)<br>cc-pVDZ | CCSD(T)<br>cc-pVTZ | <i>E</i> <sub>FPA</sub><br>(No ZPVE) |
|-------------------------------|------|----------------|----------------|----------------|------------------|-----------------|-----------------|--------------------|--------------------|--------------------------------------|
| <b>18+17</b> → 2( <b>15</b> ) | (17) | 3.86           | 3.74           | 3.71           | 3.69             | 3.23            | 3.03            | 3.68               | 3.46               | 3.28                                 |
| <b>19+17</b> → 2( <b>16</b> ) | (18) | 1.25           | 0.81           | 0.67           | 0.58             | -1.09           | -1.15           | -0.05              | 0.00               | -0.69                                |
| <b>23+17</b> → <b>15+16</b>   | (19) | 0.97           | 0.73           | 0.65           | 0.60             | 0.35            | 0.10            | 0.83               | 0.60               | 0.19                                 |
| <b>18+16</b> → <b>23+15</b>   | (20) | 2.89           | 3.01           | 3.06           | 3.10             | 2.88            | 2.93            | 2.84               | 2.86               | 3.09                                 |
| <b>21+22</b> → 2( <b>20</b> ) | (21) | 2.13           | 2.01           | 1.99           | 1.96             | 1.09            | 0.77            | 2.17               | 1.88               | 1.66                                 |
| <b>18+19</b> → 2( <b>23</b> ) | (22) | 3.17           | 3.09           | 3.08           | 3.08             | 1.44            | 1.68            | 1.96               | 2.27               | 2.21                                 |
| <b>19+15</b> → <b>23+16</b>   | (23) | 0.28           | 0.09           | 0.02           | -0.01            | -1.44           | -1.25           | -0.88              | -0.59              | -0.88                                |

**Table S2.** Atomization energies (kcal mol<sup>-1</sup>) for conjugated hydrocarbons (Set A).

| Molecule           | 6-31G(d) | B3LYP   | 6-31G(d) | 6-31G(d) | 6-31G(d) | HF      | HF      | HF      | HF      | HF        |
|--------------------|----------|---------|----------|----------|----------|---------|---------|---------|---------|-----------|
|                    | B3LYP    | ZPVE    | M05-2X   | M06      | M06-2X   | cc-pVDZ | cc-pVTZ | cc-pVQZ | cc-pV5Z | CBS limit |
| 1,3-pentadiene     | 1304.39  | 1232.96 | 1302.65  | 1307.22  | 1307.56  | 985.13  | 1001.96 | 1004.06 | 1004.61 | 1004.77   |
| 1,3-pentadiyne     | 989.93   | 948.09  | 987.73   | 997.53   | 995.54   | 720.51  | 738.29  | 740.28  | 740.71  | 740.81    |
| penta-1-ene-3-yne  | 1146.82  | 1090.32 | 1145.02  | 1152.07  | 1151.47  | 853.68  | 870.96  | 873.04  | 873.55  | 873.69    |
| penta-1-yne-3-ene  | 1143.10  | 1086.95 | 1142.24  | 1148.52  | 1148.61  | 850.84  | 868.18  | 870.27  | 870.75  | 870.87    |
| 1,3-hexadiene      | 1597.22  | 1507.69 | 1596.53  | 1601.64  | 1602.30  | 1208.60 | 1228.55 | 1230.99 | 1231.62 | 1231.80   |
| 1,3-hexadiyne      | 1282.87  | 1222.74 | 1281.58  | 1291.83  | 1290.36  | 944.14  | 965.07  | 967.40  | 967.92  | 968.04    |
| hexa-1-ene-3-yne   | 1439.69  | 1365.00 | 1438.82  | 1446.35  | 1446.25  | 1077.24 | 1097.66 | 1100.08 | 1100.67 | 1100.83   |
| hexa-1-yne-3-ene   | 1435.94  | 1361.68 | 1436.16  | 1443.01  | 1443.54  | 1074.31 | 1094.78 | 1097.20 | 1097.77 | 1097.91   |
| 2,4-hexadiene      | 1601.17  | 1512.01 | 1599.87  | 1605.75  | 1605.75  | 1211.38 | 1231.04 | 1233.46 | 1234.08 | 1234.25   |
| 2,4-hexadiyne      | 1291.56  | 1231.64 | 1289.05  | 1300.77  | 1297.89  | 951.24  | 971.82  | 974.11  | 974.64  | 974.77    |
| hexa-2-ene-4-yne   | 1444.02  | 1369.80 | 1442.72  | 1451.09  | 1450.19  | 1080.55 | 1100.69 | 1103.09 | 1103.67 | 1103.81   |
| 1,2,3-hexatriene   | 1433.54  | 1359.26 | 1430.28  | 1438.69  | 1437.24  | 1063.26 | 1083.50 | 1085.90 | 1086.48 | 1086.64   |
| 1,2,3-pentatriene  | 1140.53  | 1084.39 | 1136.25  | 1143.96  | 1142.22  | 839.64  | 856.77  | 858.83  | 859.33  | 859.47    |
| E-2,3,4-hexatriene | 1437.02  | 1362.92 | 1433.09  | 1442.12  | 1440.38  | 1065.96 | 1086.01 | 1088.40 | 1088.98 | 1089.13   |

  

| Molecule           | MP2     | MP2     | MP2     | MP2     | MP2       | CCSD    | CCSD    | CCSD(T) | CCSD(T) | $E_{\text{FPA}}$ |
|--------------------|---------|---------|---------|---------|-----------|---------|---------|---------|---------|------------------|
|                    | cc-pVDZ | cc-pVTZ | cc-pVQZ | cc-pV5Z | CBS limit | cc-pVDZ | cc-pVTZ | cc-pVDZ | cc-pVTZ | (no ZPVE)        |
| 1,3-pentadiene     | 1241.10 | 1301.20 | 1318.44 | 1324.27 | 1329.96   | 1206.05 | 1260.15 | 1219.84 | 1278.60 | 1310.67          |
| 1,3-pentadiyne     | 952.74  | 1006.10 | 1021.24 | 1026.27 | 1031.19   | 899.49  | 947.72  | 915.26  | 968.23  | 996.80           |
| penta-1-ene-3-yne  | 1096.25 | 1152.73 | 1169.00 | 1174.41 | 1179.69   | 1052.86 | 1103.79 | 1067.33 | 1122.90 | 1153.25          |
| penta-1-yne-3-ene  | 1094.05 | 1150.57 | 1166.88 | 1172.34 | 1177.69   | 1050.74 | 1101.71 | 1065.30 | 1120.95 | 1151.42          |
| 1,3-hexadiene      | 1520.79 | 1593.55 | 1614.37 | 1621.40 | 1628.30   | 1479.21 | 1544.80 | 1495.56 | 1566.73 | 1605.44          |
| 1,3-hexadiyne      | 1232.33 | 1298.44 | 1317.13 | 1323.37 | 1329.50   | 1172.55 | 1232.33 | 1190.88 | 1256.32 | 1291.52          |
| hexa-1-ene-3-yne   | 1375.75 | 1444.97 | 1464.80 | 1471.42 | 1477.90   | 1325.88 | 1388.34 | 1342.90 | 1410.92 | 1447.91          |
| hexa-1-yne-3-ene   | 1373.68 | 1442.88 | 1462.77 | 1469.45 | 1475.99   | 1323.86 | 1386.33 | 1340.96 | 1409.05 | 1446.18          |
| 2,4-hexadiene      | 1523.63 | 1596.38 | 1617.23 | 1624.24 | 1631.11   | 1481.73 | 1547.29 | 1498.09 | 1569.26 | 1608.01          |
| 2,4-hexadiyne      | 1238.65 | 1304.70 | 1323.32 | 1329.50 | 1335.55   | 1178.43 | 1238.18 | 1196.69 | 1262.06 | 1297.16          |
| hexa-2-ene-4-yne   | 1379.15 | 1448.28 | 1468.14 | 1474.74 | 1481.20   | 1328.94 | 1391.34 | 1345.97 | 1413.96 | 1450.99          |
| 1,2,3-hexatriene   | 1362.22 | 1431.54 | 1451.35 | 1457.93 | 1464.37   | 1314.51 | 1376.83 | 1332.60 | 1400.59 | 1437.47          |
| 1,2,3-pentatriene  | 1082.33 | 1138.98 | 1155.22 | 1160.58 | 1165.82   | 1041.22 | 1092.06 | 1056.75 | 1112.32 | 1142.54          |
| E-2,3,4-hexatriene | 1364.94 | 1434.36 | 1454.17 | 1460.73 | 1467.16   | 1316.75 | 1379.14 | 1334.89 | 1402.95 | 1439.84          |

**Table S3.** Atomization energies (kcal mol<sup>-1</sup>) for non-conjugated hydrocarbons (Set B).

| Molecule             | 6-31G(d) | B3LYP   | 6-31G(d) | 6-31G(d) | 6-31G(d) | HF      | HF      | HF      | HF      | HF        |
|----------------------|----------|---------|----------|----------|----------|---------|---------|---------|---------|-----------|
|                      | B3LYP    | ZPVE    | M05-2X   | M06      | M06-2X   | cc-pVDZ | cc-pVTZ | cc-pVQZ | cc-pV5Z | CBS limit |
| pentane              | 1592.06  | 1490.69 | 1591.65  | 1597.24  | 1597.38  | 1219.77 | 1236.88 | 1238.67 | 1239.14 | 1239.26   |
| 1-pentene            | 1443.81  | 1357.40 | 1443.59  | 1447.69  | 1448.57  | 1099.35 | 1116.53 | 1118.52 | 1119.05 | 1119.20   |
| 1-pentyne            | 1284.78  | 1213.54 | 1285.44  | 1291.48  | 1292.09  | 968.00  | 985.80  | 987.84  | 988.32  | 988.44    |
| 2-pentene            | 1447.24  | 1361.03 | 1446.28  | 1450.94  | 1451.39  | 1101.74 | 1118.72 | 1120.68 | 1121.20 | 1121.33   |
| 2-pentyne            | 1292.01  | 1220.60 | 1291.02  | 1298.44  | 1297.88  | 973.59  | 991.15  | 993.17  | 993.66  | 993.78    |
| 1,4-pentadiene       | 1295.30  | 1223.83 | 1295.31  | 1298.13  | 1299.87  | 978.74  | 995.89  | 998.04  | 998.61  | 998.78    |
| 1,4-pentadiyne       | 972.88   | 931.89  | 974.43   | 981.42   | 982.17   | 711.47  | 729.77  | 731.98  | 732.43  | 732.53    |
| penta-1-ene-4-yne    | 1134.95  | 1078.73 | 1135.80  | 1140.58  | 1141.94  | 846.07  | 863.82  | 866.01  | 866.52  | 866.65    |
| 1,4-hexadiene        | 1591.92  | 1502.65 | 1592.21  | 1596.70  | 1598.00  | 1204.98 | 1224.98 | 1227.45 | 1228.09 | 1228.27   |
| 1,4-hexadiyne        | 1273.88  | 1214.80 | 1274.97  | 1284.17  | 1283.81  | 941.49  | 962.65  | 965.20  | 965.76  | 965.89    |
| hexa-1-ene-4-yne     | 1435.60  | 1361.27 | 1435.94  | 1442.93  | 1443.09  | 1075.68 | 1096.26 | 1098.79 | 1099.40 | 1099.56   |
| hexa-1-yne-4-ene     | 1431.68  | 1357.68 | 1432.86  | 1439.30  | 1440.36  | 1072.46 | 1093.09 | 1095.61 | 1096.20 | 1096.35   |
| 1,5-hexadiene        | 1588.47  | 1499.05 | 1589.64  | 1593.23  | 1595.21  | 1202.49 | 1222.75 | 1225.26 | 1225.93 | 1226.12   |
| 1,5-hexadiyne        | 1269.95  | 1210.75 | 1272.76  | 1280.15  | 1281.45  | 939.11  | 960.53  | 963.11  | 963.66  | 963.79    |
| hexa-1-ene-5-yne     | 1429.27  | 1354.98 | 1431.25  | 1436.85  | 1438.52  | 1070.93 | 1091.78 | 1094.33 | 1094.94 | 1095.10   |
| 2-ethyl-1-butene     | 1738.78  | 1634.35 | 1740.52  | 1746.11  | 1746.77  | 1323.38 | 1343.53 | 1345.83 | 1346.41 | 1346.56   |
| 2-methyl-1-pentene   | 1739.68  | 1635.41 | 1741.13  | 1747.22  | 1747.74  | 1324.57 | 1344.68 | 1347.00 | 1347.59 | 1347.74   |
| 2-methyl-2-pentene   | 1741.94  | 1637.96 | 1742.52  | 1748.47  | 1748.81  | 1325.43 | 1345.42 | 1347.71 | 1348.29 | 1348.44   |
| 2-methylpentane      | 1884.58  | 1765.46 | 1886.55  | 1893.23  | 1893.43  | 1442.43 | 1462.53 | 1464.65 | 1465.20 | 1465.33   |
| 3-methylpentane      | 1883.63  | 1764.45 | 1885.90  | 1892.77  | 1892.88  | 1441.14 | 1461.19 | 1463.31 | 1463.86 | 1463.99   |
| E-3-methyl-2-pentene | 1741.24  | 1637.25 | 1742.03  | 1748.30  | 1748.41  | 1324.48 | 1344.41 | 1346.69 | 1347.27 | 1347.41   |
| Z-3-methyl-2-pentene | 1741.12  | 1637.08 | 1741.98  | 1748.39  | 1748.63  | 1324.45 | 1344.38 | 1346.66 | 1347.24 | 1347.39   |

  

| Molecule          | MP2     | MP2     | MP2     | MP2     | MP2       | CCSD    | CCSD    | CCSD(T) | CCSD(T) | $E_{\text{FPA}}$ |
|-------------------|---------|---------|---------|---------|-----------|---------|---------|---------|---------|------------------|
|                   | cc-pVDZ | cc-pVTZ | cc-pVQZ | cc-pV5Z | CBS limit | cc-pVDZ | cc-pVTZ | cc-pVDZ | cc-pVTZ | (no ZPVE)        |
| pentane           | 1509.49 | 1578.29 | 1597.17 | 1603.50 | 1609.76   | 1485.20 | 1547.69 | 1496.67 | 1563.80 | 1598.60          |
| 1-pentene         | 1371.81 | 1436.37 | 1454.45 | 1460.54 | 1466.53   | 1342.60 | 1401.02 | 1355.02 | 1418.10 | 1451.56          |
| 1-pentyne         | 1227.08 | 1288.20 | 1305.46 | 1311.24 | 1316.91   | 1189.61 | 1245.03 | 1202.74 | 1262.82 | 1294.89          |
| 2-pentene         | 1374.29 | 1438.81 | 1456.87 | 1462.94 | 1468.91   | 1344.73 | 1403.10 | 1357.20 | 1420.22 | 1453.66          |
| 2-pentyne         | 1231.81 | 1292.75 | 1309.99 | 1315.70 | 1321.30   | 1194.00 | 1249.24 | 1207.08 | 1266.91 | 1298.89          |
| 1,4-pentadiene    | 1234.04 | 1294.19 | 1311.43 | 1317.28 | 1322.98   | 1199.92 | 1254.13 | 1213.32 | 1272.18 | 1304.22          |
| 1,4-pentadiyne    | 940.71  | 993.85  | 1009.40 | 1014.58 | 1019.64   | 890.18  | 938.21  | 904.99  | 957.68  | 986.83           |
| penta-1-ene-4-yne | 1088.12 | 1144.80 | 1161.21 | 1166.73 | 1172.11   | 1045.86 | 1097.01 | 1059.96 | 1115.77 | 1146.39          |
| 1,4-hexadiene     | 1516.40 | 1589.20 | 1610.05 | 1617.08 | 1623.97   | 1475.57 | 1541.22 | 1491.53 | 1562.78 | 1601.51          |
| 1,4-hexadiyne     | 1225.74 | 1291.47 | 1310.64 | 1316.97 | 1323.16   | 1168.50 | 1227.93 | 1185.75 | 1250.74 | 1286.56          |
| hexa-1-ene-4-yne  | 1372.86 | 1442.07 | 1462.11 | 1468.77 | 1475.29   | 1323.87 | 1386.37 | 1340.42 | 1408.47 | 1445.74          |
| hexa-1-yne-4-ene  | 1370.56 | 1439.90 | 1459.93 | 1466.65 | 1473.22   | 1321.59 | 1384.21 | 1338.25 | 1406.47 | 1443.81          |

---

|                      |         |         |         |         |         |         |         |         |         |         |
|----------------------|---------|---------|---------|---------|---------|---------|---------|---------|---------|---------|
| 1,5-hexadiene        | 1513.72 | 1586.68 | 1607.57 | 1614.64 | 1621.55 | 1473.28 | 1539.09 | 1489.19 | 1560.60 | 1599.39 |
| 1,5-hexadiyne        | 1223.70 | 1289.75 | 1308.96 | 1315.37 | 1321.65 | 1166.69 | 1226.47 | 1184.02 | 1249.41 | 1285.35 |
| hexa-1-ene-5-yne     | 1368.80 | 1438.30 | 1458.36 | 1465.10 | 1471.70 | 1320.09 | 1382.88 | 1336.71 | 1405.11 | 1442.48 |
| 2-ethyl-1-butene     | 1654.11 | 1731.74 | 1753.44 | 1760.72 | 1767.90 | 1617.65 | 1687.82 | 1632.92 | 1708.75 | 1748.92 |
| 2-methyl-1-pentene   | 1654.57 | 1732.12 | 1753.90 | 1761.19 | 1768.37 | 1618.39 | 1688.50 | 1633.56 | 1709.31 | 1749.59 |
| 2-methyl-2-pentene   | 1655.92 | 1733.46 | 1755.18 | 1762.46 | 1769.64 | 1619.22 | 1689.31 | 1634.49 | 1710.22 | 1750.45 |
| 2-methylpentane      | 1790.26 | 1871.86 | 1894.37 | 1901.89 | 1909.34 | 1759.08 | 1833.09 | 1773.33 | 1852.96 | 1894.46 |
| 3-methylpentane      | 1789.53 | 1871.27 | 1893.77 | 1901.30 | 1908.75 | 1758.24 | 1832.36 | 1772.56 | 1852.34 | 1893.84 |
| E-3-methyl-2-pentene | 1655.46 | 1733.06 | 1754.77 | 1762.04 | 1769.21 | 1618.68 | 1688.82 | 1634.01 | 1709.82 | 1750.01 |
| Z-3-methyl-2-pentene | 1655.48 | 1733.12 | 1754.81 | 1762.07 | 1769.23 | 1618.69 | 1688.84 | 1634.03 | 1709.86 | 1750.01 |

---

**Table S4.** Isogyric bond separation reaction energies (kcal mol<sup>-1</sup>) for conjugated species (Set A).

| Reaction         | 6-31G(d) | B3LYP   | 6-31G(d) | 6-31G(d) | 6-31G(d)  | HF      | HF      | HF      | HF      | HF               |
|------------------|----------|---------|----------|----------|-----------|---------|---------|---------|---------|------------------|
|                  | B3LYP    | ZPVE    | M05-2X   | M06      | M06-2X    | cc-pVDZ | cc-pVTZ | cc-pVQZ | cc-pV5Z | CBS limit        |
| 35+6(65) → 5(24) | -142.30  | -110.05 | -149.30  | -143.21  | -142.00   | -153.67 | -150.15 | -149.29 | -149.17 | -149.16          |
| 36+8(65) → 5(24) | -237.21  | -188.11 | -253.54  | -238.13  | -240.21   | -254.92 | -246.50 | -245.47 | -245.40 | -245.44          |
| 39+7(65) → 5(24) | -190.09  | -149.28 | -201.60  | -190.97  | -191.18   | -203.44 | -197.50 | -196.52 | -196.40 | -196.41          |
| 41+7(65) → 5(24) | -193.81  | -152.66 | -204.37  | -194.52  | -194.04   | -206.28 | -200.28 | -199.29 | -199.20 | -199.22          |
| 2+7(65) → 6(24)  | -160.75  | -124.60 | -166.89  | -160.35  | -158.55   | -174.29 | -170.71 | -169.80 | -169.68 | -169.69          |
| 3+9(65) → 6(24)  | -255.56  | -202.74 | -271.14  | -255.39  | -256.69   | -275.39 | -266.88 | -265.78 | -265.72 | -265.77          |
| 10+8(65) → 6(24) | -208.51  | -163.89 | -219.25  | -208.25  | -207.69   | -223.97 | -217.95 | -216.90 | -216.80 | -216.81          |
| 12+8(65) → 6(24) | -212.26  | -167.21 | -221.91  | -211.59  | -210.40   | -226.91 | -220.83 | -219.78 | -219.70 | -219.74          |
| 42+7(65) → 6(24) | -156.81  | -120.29 | -163.55  | -156.24  | -155.10   | -171.51 | -168.22 | -167.32 | -167.23 | -167.24          |
| 43+9(65) → 6(24) | -246.86  | -193.83 | -263.68  | -246.45  | -249.15   | -268.29 | -260.12 | -259.07 | -259.00 | -259.04          |
| 44+8(65) → 6(24) | -204.18  | -159.08 | -215.35  | -203.51  | -203.75   | -220.66 | -214.91 | -213.89 | -213.81 | -213.83          |
| 45+8(65) → 6(24) | -214.67  | -169.62 | -227.80  | -215.92  | -216.70   | -237.96 | -232.11 | -231.08 | -230.99 | -231.01          |
| 46+9(65) → 5(24) | -196.38  | -155.21 | -210.36  | -199.08  | -200.43   | -217.47 | -211.69 | -210.72 | -210.61 | -210.62          |
| 47+8(65) → 6(24) | -211.18  | -165.96 | -224.98  | -212.49  | -213.56   | -235.25 | -229.60 | -228.59 | -228.49 | -228.52          |
| Reaction         | MP2      | MP2     | MP2      | MP2      | MP2       | CCSD    | CCSD    | CCSD(T) | CCSD(T) | $E_{\text{FPA}}$ |
|                  | cc-pVDZ  | cc-pVTZ | cc-pVQZ  | cc-pV5Z  | CBS limit | cc-pVDZ | cc-pVTZ | cc-pVDZ | cc-pVTZ | (no ZPVE)        |
| 35+6(65) → 5(24) | -135.00  | -135.14 | -133.94  | -133.14  | -132.42   | -140.82 | -141.34 | -135.66 | -135.99 | -133.34          |
| 36+8(65) → 5(24) | -226.86  | -223.15 | -221.97  | -221.23  | -220.56   | -240.44 | -237.01 | -233.29 | -229.59 | -226.90          |
| 39+7(65) → 5(24) | -181.60  | -180.06 | -178.80  | -178.05  | -177.38   | -190.54 | -189.32 | -184.69 | -183.31 | -180.61          |
| 41+7(65) → 5(24) | -183.80  | -182.23 | -180.92  | -180.11  | -179.38   | -192.66 | -191.40 | -186.73 | -185.26 | -182.44          |
| 2+7(65) → 6(24)  | -150.18  | -150.76 | -149.41  | -148.48  | -147.62   | -157.73 | -158.67 | -151.74 | -152.45 | -149.40          |
| 3+9(65) → 6(24)  | -242.15  | -238.79 | -237.48  | -236.59  | -235.78   | -257.44 | -254.38 | -249.47 | -246.10 | -243.02          |
| 10+8(65) → 6(24) | -196.97  | -195.80 | -194.39  | -193.50  | -192.70   | -207.59 | -206.75 | -200.93 | -199.88 | -196.79          |
| 12+8(65) → 6(24) | -199.04  | -197.89 | -196.42  | -195.48  | -194.61   | -209.62 | -208.75 | -202.87 | -201.75 | -198.51          |
| 42+7(65) → 6(24) | -147.34  | -147.94 | -146.55  | -145.64  | -144.81   | -155.21 | -156.18 | -149.20 | -149.93 | -146.84          |
| 43+9(65) → 6(24) | -235.83  | -232.53 | -231.29  | -230.47  | -229.73   | -251.57 | -248.52 | -243.66 | -240.36 | -237.37          |
| 44+8(65) → 6(24) | -193.57  | -192.49 | -191.05  | -190.19  | -189.40   | -204.53 | -203.74 | -197.85 | -196.85 | -193.70          |
| 45+8(65) → 6(24) | -210.50  | -209.24 | -207.84  | -206.99  | -206.23   | -218.96 | -218.26 | -211.22 | -210.21 | -207.23          |
| 46+9(65) → 5(24) | -195.53  | -193.82 | -192.58  | -191.87  | -191.24   | -202.18 | -201.05 | -195.28 | -193.89 | -191.32          |
| 47+8(65) → 6(24) | -207.78  | -206.42 | -205.03  | -204.19  | -203.44   | -216.72 | -215.95 | -208.94 | -207.85 | -204.85          |



**Table S5.** Isogyric bond separation reaction energies (kcal mol<sup>-1</sup>) for non-conjugated species (Set B).

| Reaction         | 6-31G(d) | B3LYP   | 6-31G(d) | 6-31G(d) | 6-31G(d) | HF      | HF      | HF      | HF      | HF        |
|------------------|----------|---------|----------|----------|----------|---------|---------|---------|---------|-----------|
|                  | B3LYP    | ZPVE    | M05-2X   | M06      | M06-2X   | cc-pVDZ | cc-pVTZ | cc-pVQZ | cc-pV5Z | CBS limit |
| 29+4(65) → 5(24) | -74.17   | -59.14  | -71.00   | -67.94   | -65.97   | -82.40  | -82.55  | -82.29  | -82.31  | -82.34    |
| 33+5(65) → 5(24) | -112.65  | -89.02  | -113.71  | -110.11  | -107.89  | -121.13 | -119.24 | -118.63 | -118.56 | -118.57   |
| 34+6(65) → 5(24) | -161.90  | -129.47 | -166.52  | -158.94  | -157.46  | -170.80 | -166.31 | -165.51 | -165.46 | -165.50   |
| 8+5(65) → 5(24)  | -109.22  | -85.39  | -111.02  | -106.87  | -105.07  | -118.74 | -117.05 | -116.47 | -116.42 | -116.43   |
| 9+6(65) → 5(24)  | -154.67  | -122.42 | -160.94  | -151.98  | -151.68  | -165.21 | -160.96 | -160.19 | -160.12 | -160.15   |
| 37+6(65) → 5(24) | -151.39  | -119.18 | -156.65  | -152.29  | -149.69  | -160.06 | -156.22 | -155.31 | -155.17 | -155.15   |
| 38+8(65) → 5(24) | -254.25  | -204.30 | -266.83  | -254.24  | -253.58  | -263.96 | -255.02 | -253.78 | -253.68 | -253.72   |
| 40+7(65) → 5(24) | -201.96  | -160.87 | -210.81  | -202.46  | -200.71  | -211.05 | -204.63 | -203.54 | -203.43 | -203.44   |
| 5+7(65) → 6(24)  | -166.06  | -129.64 | -171.20  | -165.28  | -162.85  | -177.92 | -174.28 | -173.33 | -173.21 | -173.22   |
| 6+9(65) → 6(24)  | -264.54  | -210.68 | -277.75  | -263.06  | -263.23  | -278.04 | -269.29 | -267.98 | -267.87 | -267.91   |
| 11+8(65) → 6(24) | -212.61  | -167.62 | -222.13  | -211.67  | -210.86  | -225.53 | -219.34 | -218.20 | -218.07 | -218.09   |
| 13+8(65) → 6(24) | -216.52  | -171.21 | -225.21  | -215.30  | -213.59  | -228.75 | -222.51 | -221.37 | -221.27 | -221.30   |
| 49+7(65) → 6(24) | -169.51  | -133.24 | -173.78  | -168.76  | -165.64  | -180.41 | -176.51 | -175.52 | -175.38 | -175.37   |
| 50+9(65) → 6(24) | -268.48  | -214.73 | -279.97  | -267.07  | -265.59  | -280.43 | -271.42 | -270.07 | -269.97 | -270.02   |
| 51+8(65) → 6(24) | -218.93  | -173.91 | -226.83  | -217.75  | -215.43  | -230.29 | -223.83 | -222.65 | -222.53 | -222.55   |
| 53+6(65) → 6(24) | -128.97  | -101.35 | -128.25  | -123.26  | -120.98  | -141.20 | -139.39 | -138.76 | -138.73 | -138.77   |
| 54+6(65) → 6(24) | -128.07  | -100.29 | -127.64  | -122.15  | -120.00  | -140.01 | -138.25 | -137.59 | -137.55 | -137.59   |
| 55+6(65) → 6(24) | -125.81  | -97.75  | -126.25  | -120.89  | -118.93  | -139.15 | -137.51 | -136.87 | -136.85 | -136.88   |
| 56+5(65) → 6(24) | -92.95   | -73.66  | -87.56   | -83.52   | -81.22   | -103.83 | -104.05 | -103.73 | -103.77 | -103.83   |
| 57+5(65) → 6(24) | -93.90   | -74.67  | -88.21   | -83.98   | -81.77   | -105.12 | -105.39 | -105.08 | -105.11 | -105.17   |
| 58+6(65) → 6(24) | -126.51  | -98.45  | -126.74  | -121.07  | -119.33  | -140.10 | -138.51 | -137.89 | -137.87 | -137.91   |
| 59+6(65) → 6(24) | -126.63  | -98.62  | -126.78  | -120.98  | -119.12  | -140.13 | -138.54 | -137.92 | -137.90 | -137.94   |

  

| Reaction         | MP2     | MP2     | MP2     | MP2     | MP2       | CCSD    | CCSD    | CCSD(T) | CCSD(T) | $E_{\text{FPA}}$ |
|------------------|---------|---------|---------|---------|-----------|---------|---------|---------|---------|------------------|
|                  | cc-pVDZ | cc-pVTZ | cc-pVQZ | cc-pV5Z | CBS limit | cc-pVDZ | cc-pVTZ | cc-pVDZ | cc-pVTZ | (no ZPVE)        |
| 29+4(65) → 5(24) | -63.10  | -65.13  | -64.38  | -63.82  | -63.25    | -68.62  | -70.56  | -65.78  | -67.55  | -65.72           |
| 33+5(65) → 5(24) | -102.54 | -103.52 | -102.52 | -101.82 | -101.17   | -107.75 | -108.85 | -103.95 | -104.87 | -102.61          |
| 34+6(65) → 5(24) | -149.02 | -148.14 | -146.92 | -146.17 | -145.47   | -157.27 | -156.46 | -152.76 | -151.76 | -149.13          |
| 8+5(65) → 5(24)  | -100.06 | -101.08 | -100.10 | -99.42  | -98.79    | -105.62 | -106.77 | -101.77 | -102.75 | -100.51          |
| 9+6(65) → 5(24)  | -144.29 | -143.59 | -142.39 | -141.71 | -141.08   | -152.88 | -152.25 | -148.43 | -147.68 | -145.12          |
| 37+6(65) → 5(24) | -142.06 | -142.15 | -140.95 | -140.13 | -139.40   | -146.95 | -147.36 | -142.18 | -142.41 | -139.80          |
| 38+8(65) → 5(24) | -238.90 | -235.40 | -233.82 | -232.92 | -232.11   | -249.75 | -246.52 | -243.57 | -240.14 | -236.87          |
| 40+7(65) → 5(24) | -189.73 | -188.00 | -186.59 | -185.72 | -184.95   | -197.54 | -196.10 | -192.07 | -190.44 | -187.47          |
| 5+7(65) → 6(24)  | -154.57 | -155.12 | -153.73 | -152.80 | -151.95   | -161.37 | -162.25 | -155.76 | -156.40 | -153.34          |
| 6+9(65) → 6(24)  | -248.73 | -245.76 | -243.97 | -243.00 | -242.12   | -261.50 | -258.77 | -254.60 | -251.68 | -247.98          |
| 11+8(65) → 6(24) | -199.86 | -198.70 | -197.08 | -196.15 | -195.32   | -209.60 | -208.71 | -203.40 | -202.33 | -198.95          |
| 13+8(65) → 6(24) | -202.16 | -200.87 | -199.26 | -198.28 | -197.39   | -211.88 | -210.87 | -205.57 | -204.33 | -200.89          |

|                         |         |         |         |         |         |         |         |         |         |         |
|-------------------------|---------|---------|---------|---------|---------|---------|---------|---------|---------|---------|
| <b>49+7(65) → 6(24)</b> | -157.25 | -157.64 | -156.21 | -155.24 | -154.37 | -163.66 | -164.38 | -158.11 | -158.58 | -155.46 |
| <b>50+9(65) → 6(24)</b> | -250.78 | -247.48 | -245.65 | -244.60 | -243.64 | -263.30 | -260.24 | -256.33 | -253.01 | -249.18 |
| <b>51+8(65) → 6(24)</b> | -203.92 | -202.47 | -200.83 | -199.82 | -198.91 | -213.38 | -212.21 | -207.12 | -205.70 | -202.21 |
| <b>53+6(65) → 6(24)</b> | -115.11 | -116.12 | -114.92 | -114.12 | -113.34 | -122.76 | -124.03 | -117.85 | -118.81 | -116.09 |
| <b>54+6(65) → 6(24)</b> | -114.65 | -115.74 | -114.47 | -113.65 | -112.86 | -122.02 | -123.35 | -117.21 | -118.26 | -115.42 |
| <b>55+6(65) → 6(24)</b> | -113.30 | -114.40 | -113.18 | -112.37 | -111.60 | -121.20 | -122.54 | -116.28 | -117.34 | -114.56 |
| <b>56+5(65) → 6(24)</b> | -77.21  | -79.54  | -78.58  | -77.90  | -77.21  | -84.81  | -87.14  | -80.91  | -82.98  | -80.70  |
| <b>57+5(65) → 6(24)</b> | -77.93  | -80.14  | -79.18  | -78.50  | -77.80  | -85.65  | -87.87  | -81.68  | -83.61  | -81.32  |
| <b>58+6(65) → 6(24)</b> | -113.76 | -114.80 | -113.59 | -112.80 | -112.03 | -121.74 | -123.03 | -116.76 | -117.74 | -114.99 |
| <b>59+6(65) → 6(24)</b> | -113.74 | -114.74 | -113.55 | -112.77 | -112.01 | -121.73 | -123.00 | -116.74 | -117.71 | -115.00 |

---

**Table S6.** Isodesmic bond separation reaction energies (kcal mol<sup>-1</sup>) for conjugated species (Set A).

| Reaction               | 6-31G(d) | B3LYP | 6-31G(d) | 6-31G(d) | 6-31G(d) | HF      | HF      | HF      | HF      | HF        |
|------------------------|----------|-------|----------|----------|----------|---------|---------|---------|---------|-----------|
|                        | B3LYP    | ZPVE  | M05-2X   | M06      | M06-2X   | cc-pVDZ | cc-pVTZ | cc-pVQZ | cc-pV5Z | CBS limit |
| 35+3(24) → 2(17)+2(22) | 19.86    | 22.03 | 18.66    | 20.98    | 19.10    | 14.18   | 13.91   | 13.80   | 13.72   | 13.67     |
| 36+3(24) → 2(17)+2(26) | 33.30    | 34.18 | 27.70    | 33.40    | 28.06    | 20.38   | 19.96   | 19.73   | 19.68   | 19.67     |
| 39+3(24) → 2(17)+22+26 | 26.25    | 27.90 | 23.00    | 26.88    | 23.50    | 18.14   | 17.77   | 17.63   | 17.59   | 17.57     |
| 41+3(24) → 2(17)+22+26 | 22.52    | 24.53 | 20.23    | 23.33    | 20.64    | 15.30   | 14.99   | 14.86   | 14.79   | 14.75     |
| 2+4(24) → 3(17)+2(22)  | 20.77    | 23.67 | 20.16    | 22.23    | 20.45    | 14.76   | 14.62   | 14.49   | 14.40   | 14.34     |
| 3+4(24) → 3(17)+2(26)  | 34.32    | 35.75 | 29.18    | 34.53    | 29.49    | 21.11   | 20.86   | 20.62   | 20.56   | 20.54     |
| 10+4(24) → 3(17)+22+26 | 27.19    | 29.49 | 24.43    | 28.00    | 24.90    | 18.80   | 18.59   | 18.44   | 18.38   | 18.36     |
| 12+4(24) → 3(17)+22+26 | 23.44    | 26.17 | 21.77    | 24.66    | 22.19    | 15.87   | 15.71   | 15.56   | 15.48   | 15.43     |
| 42+4(24) → 3(17)+2(22) | 24.72    | 27.99 | 23.49    | 26.34    | 23.91    | 17.54   | 17.11   | 16.97   | 16.85   | 16.79     |
| 43+4(24) → 3(17)+2(26) | 43.01    | 44.66 | 36.65    | 43.47    | 37.02    | 28.22   | 27.61   | 27.33   | 27.28   | 27.27     |
| 44+4(24) → 3(17)+22+26 | 31.52    | 34.30 | 28.33    | 32.74    | 28.84    | 22.11   | 21.62   | 21.45   | 21.37   | 21.34     |
| 45+4(24) → 2(17)+3(22) | 9.20     | 12.30 | 5.06     | 11.97    | 7.04     | -7.39   | -7.27   | -7.64   | -7.85   | -7.96     |
| 46+3(24) → 17+3(22)    | 8.12     | 10.51 | 3.41     | 10.41    | 5.39     | -8.10   | -8.12   | -8.47   | -8.67   | -8.77     |
| 47+4(24) → 2(17)+3(22) | 12.69    | 15.96 | 7.87     | 15.40    | 10.17    | -4.68   | -4.76   | -5.14   | -5.36   | -5.47     |

  

| Reaction               | MP2     | MP2     | MP2     | MP2     | MP2       | CCSD    | CCSD    | CCSD(T) | CCSD(T) | <i>E</i> <sub>FPA</sub> |
|------------------------|---------|---------|---------|---------|-----------|---------|---------|---------|---------|-------------------------|
|                        | cc-pVDZ | cc-pVTZ | cc-pVQZ | cc-pV5Z | CBS limit | cc-pVDZ | cc-pVTZ | cc-pVDZ | cc-pVTZ | (no ZPVE)               |
| 35+3(24) → 2(17)+2(22) | 19.04   | 19.69   | 19.84   | 19.72   | 19.64     | 15.58   | 16.08   | 16.72   | 17.30   | 17.45                   |
| 36+3(24) → 2(17)+2(26) | 25.46   | 26.34   | 26.06   | 25.68   | 25.33     | 20.35   | 21.07   | 21.81   | 22.54   | 21.89                   |
| 39+3(24) → 2(17)+22+26 | 21.58   | 22.10   | 22.10   | 21.84   | 21.59     | 18.06   | 18.43   | 19.04   | 19.40   | 19.18                   |
| 41+3(24) → 2(17)+22+26 | 19.38   | 19.93   | 19.99   | 19.78   | 19.59     | 15.94   | 16.36   | 17.00   | 17.45   | 17.36                   |
| 2+4(24) → 3(17)+2(22)  | 21.25   | 22.11   | 22.27   | 22.13   | 22.02     | 17.12   | 17.77   | 18.52   | 19.28   | 19.42                   |
| 3+4(24) → 3(17)+2(26)  | 27.57   | 28.73   | 28.46   | 28.06   | 27.69     | 21.78   | 22.73   | 23.52   | 24.48   | 23.81                   |
| 10+4(24) → 3(17)+22+26 | 23.60   | 24.40   | 24.42   | 24.13   | 23.86     | 19.45   | 20.03   | 20.69   | 21.28   | 21.04                   |
| 12+4(24) → 3(17)+22+26 | 21.53   | 22.30   | 22.39   | 22.15   | 21.95     | 17.42   | 18.02   | 18.76   | 19.41   | 19.31                   |
| 42+4(24) → 3(17)+2(22) | 24.09   | 24.93   | 25.14   | 24.96   | 24.83     | 19.63   | 20.26   | 21.06   | 21.81   | 21.98                   |
| 43+4(24) → 3(17)+2(26) | 33.89   | 35.00   | 34.65   | 34.18   | 33.74     | 27.66   | 28.58   | 29.32   | 30.22   | 29.46                   |
| 44+4(24) → 3(17)+22+26 | 27.01   | 27.70   | 27.76   | 27.44   | 27.16     | 22.50   | 23.03   | 23.77   | 24.31   | 24.13                   |
| 45+4(24) → 2(17)+3(22) | 3.17    | 4.98    | 4.93    | 4.55    | 4.26      | -2.78   | -1.15   | -0.55   | 1.26    | 0.93                    |
| 46+3(24) → 17+3(22)    | 0.75    | 2.36    | 2.29    | 1.93    | 1.65      | -4.44   | -2.96   | -2.49   | -0.86   | -1.20                   |
| 47+4(24) → 2(17)+3(22) | 5.89    | 7.80    | 7.75    | 7.35    | 7.05      | -0.54   | 1.16    | 1.74    | 3.63    | 3.30                    |

**Table S7.** Isodesmic bond separation reaction energies (kcal mol<sup>-1</sup>) for non-conjugated species (Set B).

| Reaction               | 6-31G(d) | B3LYP | 6-31G(d) | 6-31G(d) | 6-31G(d) | HF      | HF      | HF      | HF      | HF        |
|------------------------|----------|-------|----------|----------|----------|---------|---------|---------|---------|-----------|
|                        | B3LYP    | ZPVE  | M05-2X   | M06      | M06-2X   | cc-pVDZ | cc-pVTZ | cc-pVQZ | cc-pV5Z | CBS limit |
| 29+3(24) → 4(17)       | 3.30     | 5.65  | 5.34     | 5.63     | 5.66     | 2.41    | 2.52    | 2.50    | 2.46    | 2.44      |
| 33+3(24) → 22+3(17)    | 7.16     | 9.42  | 8.44     | 8.77     | 8.48     | 5.19    | 5.33    | 5.30    | 5.27    | 5.24      |
| 34+3(24) → 26+3(17)    | 12.09    | 14.07 | 12.27    | 13.61    | 12.49    | 9.25    | 9.46    | 9.48    | 9.47    | 9.46      |
| 8+3(24) → 3(17)+22     | 10.59    | 13.04 | 11.13    | 12.01    | 11.29    | 7.59    | 7.52    | 7.47    | 7.41    | 7.37      |
| 9+3(24) → 3(17)+26     | 19.32    | 21.12 | 17.85    | 20.57    | 18.27    | 14.85   | 14.80   | 14.81   | 14.81   | 14.80     |
| 37+3(24) → 2(22)+2(17) | 10.77    | 12.89 | 11.31    | 11.89    | 11.41    | 7.79    | 7.85    | 7.78    | 7.72    | 7.68      |
| 38+3(24) → 2(26)+2(17) | 16.25    | 17.99 | 14.41    | 17.29    | 14.69    | 11.34   | 11.45   | 11.43   | 11.41   | 11.39     |
| 40+3(24) → 22+26+2(17) | 14.37    | 16.31 | 13.79    | 15.40    | 13.97    | 10.53   | 10.64   | 10.60   | 10.56   | 10.53     |
| 5+4(24) → 3(17)+2(22)  | 15.47    | 18.63 | 15.84    | 17.30    | 16.16    | 11.13   | 11.05   | 10.96   | 10.87   | 10.81     |
| 6+4(24) → 3(17)+2(26)  | 25.33    | 27.81 | 22.57    | 26.87    | 22.94    | 18.47   | 18.44   | 18.42   | 18.40   | 18.40     |
| 11+4(24) → 3(17)+22+26 | 23.09    | 25.77 | 21.55    | 24.58    | 21.73    | 17.25   | 17.19   | 17.15   | 17.11   | 17.08     |
| 13+4(24) → 3(17)+22+26 | 19.18    | 22.18 | 18.47    | 20.95    | 19.00    | 14.03   | 14.02   | 13.98   | 13.91   | 13.87     |
| 49+4(24) → 2(22)+3(17) | 12.02    | 15.03 | 13.26    | 13.82    | 13.36    | 8.64    | 8.82    | 8.77    | 8.70    | 8.66      |
| 50+4(24) → 2(26)+3(17) | 21.39    | 23.76 | 20.36    | 22.85    | 20.59    | 16.08   | 16.32   | 16.33   | 16.30   | 16.29     |
| 51+4(24) → 22+26+3(17) | 16.77    | 19.47 | 16.86    | 18.50    | 17.16    | 12.49   | 12.71   | 12.69   | 12.65   | 12.62     |
| 53+4(24) → 4(17)+22    | 10.21    | 13.28 | 12.99    | 14.01    | 13.29    | 6.33    | 6.44    | 6.38    | 6.29    | 6.24      |
| 54+4(24) → 4(17)+22    | 11.11    | 14.34 | 13.60    | 15.12    | 14.27    | 7.52    | 7.59    | 7.55    | 7.47    | 7.42      |
| 55+4(24) → 4(17)+22    | 13.37    | 16.88 | 14.99    | 16.38    | 15.34    | 8.37    | 8.33    | 8.26    | 8.18    | 8.12      |
| 56+4(24) → 5(17)       | 3.89     | 7.33  | 7.86     | 8.45     | 8.31     | 2.17    | 2.28    | 2.25    | 2.19    | 2.16      |
| 57+4(24) → 5(17)       | 2.95     | 6.32  | 7.22     | 7.99     | 7.77     | 0.88    | 0.95    | 0.91    | 0.85    | 0.81      |
| 58+4(24) → 4(17)+22    | 12.67    | 16.18 | 14.50    | 16.20    | 14.94    | 7.42    | 7.32    | 7.24    | 7.15    | 7.09      |
| 59+4(24) → 4(17)+22    | 12.55    | 16.01 | 14.45    | 16.29    | 15.15    | 7.39    | 7.29    | 7.21    | 7.12    | 7.07      |

  

| Reaction               | MP2     | MP2     | MP2     | MP2     | MP2       | CCSD    | CCSD    | CCSD(T) | CCSD(T) | $E_{\text{FPA}}$ |
|------------------------|---------|---------|---------|---------|-----------|---------|---------|---------|---------|------------------|
|                        | cc-pVDZ | cc-pVTZ | cc-pVQZ | cc-pV5Z | CBS limit | cc-pVDZ | cc-pVTZ | cc-pVDZ | cc-pVTZ | (no ZPVE)        |
| 29+3(24) → 4(17)       | 6.46    | 7.01    | 7.22    | 7.16    | 7.11      | 5.12    | 5.52    | 5.77    | 6.24    | 6.96             |
| 33+3(24) → 22+3(17)    | 9.26    | 9.97    | 10.17   | 10.10   | 10.04     | 7.33    | 7.90    | 8.01    | 8.67    | 9.42             |
| 34+3(24) → 26+3(17)    | 11.93   | 12.67   | 12.89   | 12.77   | 12.65     | 10.00   | 10.62   | 10.56   | 11.20   | 12.22            |
| 8+3(24) → 3(17)+22     | 11.75   | 12.41   | 12.59   | 12.50   | 12.42     | 9.46    | 9.98    | 10.19   | 10.79   | 11.62            |
| 9+3(24) → 3(17)+26     | 16.65   | 17.22   | 17.43   | 17.24   | 17.04     | 14.39   | 14.83   | 14.90   | 15.28   | 16.64            |
| 37+3(24) → 2(22)+2(17) | 11.98   | 12.69   | 12.83   | 12.73   | 12.65     | 9.46    | 10.06   | 10.20   | 10.88   | 11.65            |
| 38+3(24) → 2(26)+2(17) | 13.43   | 14.09   | 14.22   | 13.99   | 13.78     | 11.04   | 11.56   | 11.53   | 11.99   | 13.31            |
| 40+3(24) → 22+26+2(17) | 13.45   | 14.16   | 14.32   | 14.16   | 14.02     | 11.06   | 11.65   | 11.67   | 12.27   | 13.30            |
| 5+4(24) → 3(17)+2(22)  | 16.86   | 17.75   | 17.95   | 17.80   | 17.69     | 13.47   | 14.19   | 14.50   | 15.33   | 16.44            |
| 6+4(24) → 3(17)+2(26)  | 20.99   | 21.76   | 21.96   | 21.66   | 21.35     | 17.73   | 18.33   | 18.38   | 18.90   | 20.77            |
| 11+4(24) → 3(17)+22+26 | 20.72   | 21.50   | 21.73   | 21.48   | 21.24     | 17.44   | 18.06   | 18.22   | 18.82   | 20.48            |
| 13+4(24) → 3(17)+22+26 | 18.41   | 19.32   | 19.55   | 19.35   | 19.17     | 15.16   | 15.90   | 16.05   | 16.83   | 18.22            |

|                               |       |       |       |       |       |       |       |       |       |       |
|-------------------------------|-------|-------|-------|-------|-------|-------|-------|-------|-------|-------|
| <b>49+4(24) → 2(22)+3(17)</b> | 14.18 | 15.23 | 15.47 | 15.36 | 15.27 | 11.18 | 12.06 | 12.15 | 13.15 | 14.19 |
| <b>50+4(24) → 2(26)+3(17)</b> | 18.94 | 20.04 | 20.28 | 20.06 | 19.84 | 15.92 | 16.87 | 16.66 | 17.57 | 19.09 |
| <b>51+4(24) → 22+26+3(17)</b> | 16.65 | 17.72 | 17.98 | 17.81 | 17.65 | 13.66 | 14.57 | 14.50 | 15.46 | 16.75 |
| <b>53+4(24) → 4(17)+22</b>    | 14.09 | 15.41 | 15.67 | 15.55 | 15.45 | 10.75 | 11.75 | 12.00 | 13.17 | 14.43 |
| <b>54+4(24) → 4(17)+22</b>    | 14.55 | 15.78 | 16.13 | 16.02 | 15.93 | 11.49 | 12.43 | 12.64 | 13.73 | 15.01 |
| <b>55+4(24) → 4(17)+22</b>    | 15.89 | 17.12 | 17.41 | 17.29 | 17.19 | 12.31 | 13.23 | 13.56 | 14.65 | 16.02 |
| <b>56+4(24) → 5(17)</b>       | 9.75  | 10.63 | 10.93 | 10.82 | 10.74 | 7.37  | 7.96  | 8.52  | 9.26  | 10.45 |
| <b>57+4(24) → 5(17)</b>       | 9.02  | 10.04 | 10.33 | 10.23 | 10.15 | 6.53  | 7.23  | 7.75  | 8.63  | 9.86  |
| <b>58+4(24) → 4(17)+22</b>    | 15.43 | 16.73 | 17.00 | 16.87 | 16.77 | 11.77 | 12.74 | 13.09 | 14.24 | 15.62 |
| <b>59+4(24) → 4(17)+22</b>    | 15.45 | 16.78 | 17.04 | 16.90 | 16.79 | 11.78 | 12.77 | 13.10 | 14.28 | 15.70 |

---

**Table S8.** Hypohomodesmotic bond separation reaction energies (kcal mol<sup>-1</sup>) for conjugated species (Set A).

| Reaction                  | 6-31G(d) | B3LYP | 6-31G(d) | 6-31G(d) | 6-31G(d) | HF      | HF      | HF      | HF      | HF        |
|---------------------------|----------|-------|----------|----------|----------|---------|---------|---------|---------|-----------|
|                           | B3LYP    | ZPVE  | M05-2X   | M06      | M06-2X   | cc-pVDZ | cc-pVTZ | cc-pVQZ | cc-pV5Z | CBS limit |
| 35+17+22 → 3(15)          | 4.67     | 4.68  | 3.81     | 4.37     | 3.95     | 2.81    | 2.64    | 2.55    | 2.50    | 2.48      |
| 36+17+26 → 3(16)          | 3.95     | 3.07  | 1.27     | 2.53     | 1.36     | -2.57   | -2.97   | -3.30   | -3.39   | -3.41     |
| 39+17+26 → 15+2(16)       | 1.62     | 1.38  | 0.43     | 0.77     | 0.65     | -0.95   | -1.28   | -1.47   | -1.53   | -1.56     |
| 41+17+22 → 2(15)+16       | 2.62     | 2.59  | 1.52     | 1.97     | 1.64     | 0.07    | -0.17   | -0.32   | -0.38   | -0.41     |
| 2+2(17)+22 → 3(15)+14     | 4.46     | 4.49  | 3.50     | 3.90     | 3.55     | 2.54    | 2.44    | 2.34    | 2.29    | 2.26      |
| 3+2(17)+26 → 3(16)+14     | 3.84     | 2.80  | 0.94     | 1.94     | 1.04     | -2.68   | -2.99   | -3.32   | -3.41   | -3.43     |
| 10+2(17)+26 → 15+2(16)+14 | 1.44     | 1.13  | 0.05     | 0.16     | 0.30     | -1.13   | -1.37   | -1.57   | -1.63   | -1.66     |
| 12+2(17)+22 → 2(15)+16+14 | 2.40     | 2.40  | 1.25     | 1.57     | 1.43     | -0.20   | -0.37   | -0.52   | -0.59   | -0.62     |
| 42+17+2(22) → 4(15)       | 4.47     | 4.85  | 3.69     | 4.20     | 3.71     | 2.38    | 2.08    | 1.97    | 1.90    | 1.86      |
| 43+17+2(26) → 4(16)       | 3.88     | 3.17  | 1.41     | 2.31     | 1.43     | -2.38   | -2.97   | -3.39   | -3.49   | -3.51     |
| 44+17+22+26 → 2(15)+2(16) | 1.83     | 1.99  | 0.81     | 1.08     | 0.94     | -0.77   | -1.19   | -1.41   | -1.49   | -1.52     |
| 45+2(22)+17 → 2(20)+15+14 | 1.58     | 1.04  | -0.05    | 0.41     | 0.00     | -0.78   | -0.73   | -0.75   | -0.74   | -0.72     |
| 46+2(22) → 2(20)+15       | 1.63     | 1.09  | 0.11     | 0.58     | 0.12     | -0.65   | -0.66   | -0.68   | -0.66   | -0.65     |
| 47+3(22) → 2(20)+2(15)    | 1.14     | 0.75  | -0.37    | 0.03     | -0.15    | -1.02   | -1.06   | -1.10   | -1.09   | -1.08     |

  

| Reaction                  | MP2     | MP2     | MP2     | MP2     | MP2       | CCSD    | CCSD    | CCSD(T) | CCSD(T) | $E_{\text{FPA}}$ |
|---------------------------|---------|---------|---------|---------|-----------|---------|---------|---------|---------|------------------|
|                           | cc-pVDZ | cc-pVTZ | cc-pVQZ | cc-pV5Z | CBS limit | cc-pVDZ | cc-pVTZ | cc-pVDZ | cc-pVTZ | (no ZPVE)        |
| 35+17+22 → 3(15)          | 4.32    | 4.07    | 3.91    | 3.86    | 3.83      | 3.31    | 3.02    | 3.84    | 3.53    | 3.30             |
| 36+17+26 → 3(16)          | 2.37    | 2.53    | 1.90    | 1.73    | 1.63      | -0.29   | -0.21   | 0.86    | 1.06    | 0.14             |
| 39+17+26 → 15+2(16)       | 1.28    | 1.02    | 0.69    | 0.59    | 0.52      | 0.20    | -0.12   | 0.78    | 0.49    | -0.04            |
| 41+17+22 → 2(15)+16       | 1.87    | 1.58    | 1.32    | 1.22    | 1.15      | 0.87    | 0.55    | 1.44    | 1.11    | 0.67             |
| 2+2(17)+22 → 3(15)+14     | 4.42    | 4.19    | 3.99    | 3.93    | 3.89      | 3.16    | 2.90    | 3.78    | 3.49    | 3.18             |
| 3+2(17)+26 → 3(16)+14     | 2.36    | 2.64    | 1.94    | 1.77    | 1.66      | -0.54   | -0.37   | 0.69    | 0.97    | -0.03            |
| 10+2(17)+26 → 15+2(16)+14 | 1.19    | 1.03    | 0.64    | 0.53    | 0.46      | -0.09   | -0.33   | 0.57    | 0.34    | -0.27            |
| 12+2(17)+22 → 2(15)+16+14 | 1.91    | 1.67    | 1.36    | 1.25    | 1.18      | 0.67    | 0.40    | 1.32    | 1.04    | 0.54             |
| 42+17+2(22) → 4(15)       | 4.46    | 4.10    | 3.90    | 3.81    | 3.76      | 3.26    | 2.85    | 3.89    | 3.45    | 3.11             |
| 43+17+2(26) → 4(16)       | 3.10    | 3.26    | 2.43    | 2.25    | 2.14      | 0.13    | 0.20    | 1.38    | 1.57    | 0.45             |
| 44+17+22+26 → 2(15)+2(16) | 1.79    | 1.42    | 1.03    | 0.90    | 0.82      | 0.56    | 0.13    | 1.22    | 0.81    | 0.19             |
| 45+2(22)+17 → 2(20)+15+14 | 3.09    | 2.95    | 2.72    | 2.69    | 2.67      | 1.05    | 0.77    | 2.35    | 2.09    | 1.75             |
| 46+2(22) → 2(20)+15       | 2.78    | 2.62    | 2.43    | 2.41    | 2.39      | 1.07    | 0.77    | 2.27    | 2.00    | 1.71             |
| 47+3(22) → 2(20)+2(15)    | 3.01    | 2.85    | 2.58    | 2.55    | 2.52      | 0.87    | 0.54    | 2.21    | 1.90    | 1.50             |

**Table S9.** Homodesmotic bond separation reaction energies (kcal mol<sup>-1</sup>) for conjugated species (Set A).

| Reaction            | 6-31G(d) | B3LYP   | 6-31G(d) | 6-31G(d) | 6-31G(d)  | HF      | HF      | HF      | HF      | HF                      |
|---------------------|----------|---------|----------|----------|-----------|---------|---------|---------|---------|-------------------------|
|                     | B3LYP    | ZPVE    | M05-2X   | M06      | M06-2X    | cc-pVDZ | cc-pVTZ | cc-pVQZ | cc-pV5Z | CBS limit               |
| 35+22 → 18+15       | 0.01     | 0.34    | -0.04    | 0.33     | 0.25      | -0.19   | -0.27   | -0.28   | -0.30   | -0.30                   |
| 36+26 → 19+16       | 0.48     | 0.80    | 0.57     | 0.50     | 0.56      | 0.73    | 0.63    | 0.55    | 0.55    | 0.55                    |
| 39+26 → 23+16       | -0.51    | -0.37   | -0.52    | -0.41    | -0.27     | -0.55   | -0.68   | -0.74   | -0.75   | -0.75                   |
| 41+22 → 23+15       | 0.49     | 0.84    | 0.56     | 0.79     | 0.72      | 0.48    | 0.42    | 0.42    | 0.41    | 0.40                    |
| 2+22+17 → 18+14+15  | -0.21    | 0.15    | -0.35    | -0.15    | -0.16     | -0.45   | -0.48   | -0.49   | -0.51   | -0.52                   |
| 3+26+17 → 19+14+16  | 0.38     | 0.53    | 0.24     | -0.09    | 0.24      | 0.62    | 0.61    | 0.53    | 0.53    | 0.53                    |
| 10+26+17 → 23+14+16 | -0.69    | -0.62   | -0.91    | -1.02    | -0.63     | -0.72   | -0.78   | -0.83   | -0.85   | -0.85                   |
| 12+22+17 → 23+14+15 | 0.28     | 0.65    | 0.29     | 0.39     | 0.51      | 0.21    | 0.23    | 0.22    | 0.20    | 0.19                    |
| 42+2(22) → 2(15)+18 | -0.20    | 0.52    | -0.15    | 0.15     | 0.00      | -0.62   | -0.83   | -0.87   | -0.90   | -0.92                   |
| 43+2(26) → 2(16)+19 | 0.41     | 0.90    | 0.71     | 0.28     | 0.63      | 0.92    | 0.63    | 0.47    | 0.45    | 0.45                    |
| 44+22+26 → 15+16+23 | -0.30    | 0.24    | -0.14    | -0.09    | 0.02      | -0.36   | -0.59   | -0.67   | -0.70   | -0.71                   |
| 45+22+17 → 21+15+14 | -0.21    | -0.20   | -0.26    | -0.55    | -0.26     | -0.15   | -0.07   | -0.08   | -0.08   | -0.08                   |
| 46+22 → 21+15       | -0.17    | -0.15   | -0.10    | -0.38    | -0.15     | -0.03   | -0.01   | -0.01   | -0.01   | -0.01                   |
| 47+2(22) → 21+2(15) | -0.66    | -0.49   | -0.59    | -0.92    | -0.42     | -0.39   | -0.41   | -0.43   | -0.44   | -0.44                   |
| Reaction            | MP2      | MP2     | MP2      | MP2      | MP2       | CCSD    | CCSD    | CCSD(T) | CCSD(T) | <i>E</i> <sub>FPA</sub> |
|                     | cc-pVDZ  | cc-pVTZ | cc-pVQZ  | cc-pV5Z  | CBS limit | cc-pVDZ | cc-pVTZ | cc-pVDZ | cc-pVTZ | (no ZPVE)               |
| 35+22 → 18+15       | 0.28     | 0.21    | 0.18     | 0.15     | 0.14      | 0.07    | -0.01   | 0.28    | 0.21    | 0.35                    |
| 36+26 → 19+16       | 1.14     | 1.28    | 1.09     | 1.06     | 1.05      | 0.80    | 0.94    | 1.14    | 1.28    | 1.14                    |
| 39+26 → 23+16       | 0.10     | 0.05    | -0.04    | -0.06    | -0.07     | -0.15   | -0.22   | 0.10    | 0.05    | -0.09                   |
| 41+22 → 23+15       | 0.69     | 0.61    | 0.59     | 0.57     | 0.56      | 0.52    | 0.45    | 0.69    | 0.61    | 0.83                    |
| 2+22+17 → 18+14+15  | 0.38     | 0.33    | 0.25     | 0.22     | 0.19      | -0.08   | -0.13   | 0.38    | 0.33    | 0.25                    |
| 3+26+17 → 19+14+16  | 1.13     | 1.39    | 1.13     | 1.10     | 1.08      | 0.55    | 0.78    | 1.13    | 1.39    | 0.80                    |
| 10+26+17 → 23+14+16 | 0.01     | 0.06    | -0.08    | -0.11    | -0.13     | -0.44   | -0.43   | 0.01    | 0.06    | -0.40                   |
| 12+22+17 → 23+14+15 | 0.73     | 0.70    | 0.63     | 0.61     | 0.59      | 0.32    | 0.30    | 0.73    | 0.70    | 0.71                    |
| 42+2(22) → 2(15)+18 | 0.42     | 0.24    | 0.16     | 0.11     | 0.06      | 0.03    | -0.18   | 0.42    | 0.24    | 0.54                    |
| 43+2(26) → 2(16)+19 | 1.86     | 2.01    | 1.62     | 1.58     | 1.56      | 1.22    | 1.35    | 1.86    | 2.01    | 1.62                    |
| 44+22+26 → 15+16+23 | 0.61     | 0.45    | 0.30     | 0.26     | 0.23      | 0.21    | 0.03    | 0.61    | 0.45    | 0.54                    |
| 45+22+17 → 21+15+14 | 0.74     | 0.82    | 0.71     | 0.71     | 0.71      | -0.05   | 0.00    | 0.74    | 0.82    | 0.10                    |
| 46+22 → 21+15       | 0.43     | 0.49    | 0.43     | 0.43     | 0.43      | -0.03   | 0.00    | 0.43    | 0.49    | 0.07                    |
| 47+2(22) → 21+2(15) | 0.66     | 0.71    | 0.57     | 0.56     | 0.55      | -0.22   | -0.23   | 0.66    | 0.71    | 0.01                    |

**Table S10.** Homodesmotic bond separation reaction energies (kcal mol<sup>-1</sup>) for non-conjugated species (Set B).

| Reaction                  | 6-31G(d) | B3LYP | 6-31G(d) | 6-31G(d) | 6-31G(d) | HF      | HF      | HF      | HF      | HF        |
|---------------------------|----------|-------|----------|----------|----------|---------|---------|---------|---------|-----------|
|                           | B3LYP    | ZPVE  | M05-2X   | M06      | M06-2X   | cc-pVDZ | cc-pVTZ | cc-pVQZ | cc-pV5Z | CBS limit |
| 29+2(17) → 3(14)          | -0.08    | 0.14  | -0.10    | 0.45     | 0.39     | -0.12   | -0.22   | -0.21   | -0.22   | -0.22     |
| 33+2(17) → 15+2(14)       | -0.15    | -0.04 | -0.13    | -0.22    | -0.08    | -0.28   | -0.25   | -0.25   | -0.26   | -0.27     |
| 34+2(17) → 16+2(14)       | 0.05     | 0.03  | -0.16    | -0.13    | 0.08     | -0.08   | -0.01   | 0.00    | -0.01   | -0.02     |
| 8+17+22 → 2(15)+14        | -0.66    | -0.36 | -0.58    | -0.79    | -0.56    | -0.84   | -0.91   | -0.94   | -0.96   | -0.98     |
| 9+26+17 → 2(16)+14        | -1.37    | -1.45 | -1.58    | -1.74    | -1.28    | -1.30   | -1.40   | -1.45   | -1.47   | -1.48     |
| 37+2(17) → 2(15)+14       | -0.48    | -0.51 | -0.40    | -0.91    | -0.44    | -0.63   | -0.58   | -0.63   | -0.66   | -0.68     |
| 38+2(17) → 2(16)+14       | -4.44    | -4.58 | -5.02    | -5.02    | -4.87    | -4.80   | -4.76   | -4.83   | -4.87   | -4.89     |
| 40+2(17) → 15+16+14       | -1.60    | -1.68 | -1.78    | -2.16    | -1.73    | -1.76   | -1.68   | -1.73   | -1.76   | -1.78     |
| 5+2(17)+22 → 3(15)+14     | -0.85    | -0.55 | -0.82    | -1.04    | -0.74    | -1.08   | -1.14   | -1.20   | -1.25   | -1.27     |
| 6+2(17)+26 → 3(16)+14     | -5.14    | -5.13 | -5.67    | -5.73    | -5.51    | -5.33   | -5.41   | -5.52   | -5.56   | -5.58     |
| 11+2(17)+26 → 2(16)+15+14 | -2.66    | -2.59 | -2.83    | -3.26    | -2.87    | -2.69   | -2.77   | -2.86   | -2.91   | -2.93     |
| 13+2(17)+22 → 16+2(15)+14 | -1.86    | -1.60 | -2.05    | -2.14    | -1.75    | -2.05   | -2.05   | -2.11   | -2.15   | -2.18     |
| 49+3(17) → 2(15)+2(14)    | -0.36    | -0.21 | -0.26    | -0.71    | -0.24    | -0.63   | -0.51   | -0.54   | -0.57   | -0.58     |
| 50+3(17) → 2(16)+2(14)    | -0.43    | -0.65 | -0.89    | -1.18    | -0.72    | -0.91   | -0.80   | -0.84   | -0.87   | -0.88     |
| 51+3(17) → 15+16+2(14)    | -0.33    | -0.35 | -0.52    | -0.78    | -0.30    | -0.64   | -0.52   | -0.54   | -0.57   | -0.59     |
| 53+2(17) → 2(14)+60       | -1.93    | -2.01 | -1.16    | -1.02    | -0.89    | -2.58   | -2.64   | -2.69   | -2.72   | -2.74     |
| 54+2(17) → 2(14)+60       | -1.03    | -0.96 | -0.55    | 0.09     | 0.08     | -1.40   | -1.50   | -1.52   | -1.54   | -1.56     |
| 55+17+22 → 14+15+60       | -2.71    | -2.36 | -2.30    | -2.46    | -2.14    | -3.49   | -3.60   | -3.65   | -3.68   | -3.70     |
| 56+2(17) → 63+2(14)       | -1.07    | -0.91 | -0.75    | 0.05     | -0.10    | -1.46   | -1.59   | -1.60   | -1.61   | -1.61     |
| 57+2(17) → 63+2(14)       | -2.02    | -1.92 | -1.40    | -0.41    | -0.65    | -2.75   | -2.93   | -2.94   | -2.95   | -2.96     |
| 58+17+22 → 14+15+60       | -3.41    | -3.06 | -2.79    | -2.64    | -2.54    | -4.44   | -4.61   | -4.67   | -4.71   | -4.72     |
| 59+17+22 → 14+15+60       | -3.53    | -3.23 | -2.84    | -2.55    | -2.32    | -4.47   | -4.64   | -4.70   | -4.73   | -4.75     |

  

| Reaction                  | MP2     | MP2     | MP2     | MP2     | MP2       | CCSD    | CCSD    | CCSD(T) | CCSD(T) | <i>E</i> <sub>FPA</sub> |
|---------------------------|---------|---------|---------|---------|-----------|---------|---------|---------|---------|-------------------------|
|                           | cc-pVDZ | cc-pVTZ | cc-pVQZ | cc-pV5Z | CBS limit | cc-pVDZ | cc-pVTZ | cc-pVDZ | cc-pVTZ | (no ZPVE)               |
| 29+2(17) → 3(14)          | 0.14    | 0.15    | 0.15    | 0.14    | 0.12      | 0.08    | 0.08    | 0.16    | 0.16    | 0.13                    |
| 33+2(17) → 15+2(14)       | 0.14    | 0.19    | 0.15    | 0.13    | 0.11      | -0.13   | -0.08   | -0.02   | 0.03    | -0.05                   |
| 34+2(17) → 16+2(14)       | 0.01    | 0.17    | 0.13    | 0.11    | 0.09      | -0.25   | -0.10   | -0.16   | -0.02   | -0.10                   |
| 8+17+22 → 2(15)+14        | -0.18   | -0.29   | -0.38   | -0.42   | -0.45     | -0.41   | -0.54   | -0.27   | -0.41   | -0.58                   |
| 9+26+17 → 2(16)+14        | -0.85   | -0.93   | -1.04   | -1.07   | -1.09     | -1.05   | -1.17   | -0.94   | -1.07   | -1.25                   |
| 37+2(17) → 2(15)+14       | 0.05    | -0.02   | -0.15   | -0.19   | -0.21     | -0.41   | -0.46   | -0.26   | -0.33   | -0.53                   |
| 38+2(17) → 2(16)+14       | -4.08   | -4.07   | -4.25   | -4.31   | -4.35     | -4.40   | -4.44   | -4.31   | -4.36   | -4.67                   |
| 40+2(17) → 15+16+14       | -1.26   | -1.27   | -1.40   | -1.45   | -1.48     | -1.60   | -1.62   | -1.47   | -1.51   | -1.74                   |
| 5+2(17)+22 → 3(15)+14     | 0.03    | -0.16   | -0.33   | -0.40   | -0.45     | -0.49   | -0.68   | -0.25   | -0.46   | -0.76                   |
| 6+2(17)+26 → 3(16)+14     | -4.22   | -4.33   | -4.56   | -4.63   | -4.68     | -4.60   | -4.77   | -4.44   | -4.62   | -5.00                   |
| 11+2(17)+26 → 2(16)+15+14 | -1.70   | -1.87   | -2.05   | -2.11   | -2.16     | -2.10   | -2.30   | -1.91   | -2.12   | -2.43                   |
| 13+2(17)+22 → 16+2(15)+14 | -1.21   | -1.32   | -1.48   | -1.55   | -1.59     | -1.59   | -1.72   | -1.38   | -1.54   | -1.84                   |



|                               |       |       |       |       |       |       |       |       |       |       |
|-------------------------------|-------|-------|-------|-------|-------|-------|-------|-------|-------|-------|
| <b>49+3(17) → 2(15)+2(14)</b> | 0.15  | 0.24  | 0.14  | 0.11  | 0.08  | -0.37 | -0.28 | -0.17 | -0.08 | -0.26 |
| <b>50+3(17) → 2(16)+2(14)</b> | -0.67 | -0.40 | -0.54 | -0.59 | -0.62 | -1.20 | -0.95 | -1.05 | -0.81 | -1.04 |
| <b>51+3(17) → 15+16+2(14)</b> | -0.17 | 0.01  | -0.10 | -0.14 | -0.17 | -0.68 | -0.51 | -0.51 | -0.35 | -0.54 |
| <b>53+2(17) → 2(14)+60</b>    | -0.76 | -0.53 | -0.63 | -0.67 | -0.70 | -1.32 | -1.17 | -1.02 | -0.82 | -0.99 |
| <b>54+2(17) → 2(14)+60</b>    | -0.30 | -0.15 | -0.17 | -0.20 | -0.22 | -0.57 | -0.49 | -0.38 | -0.26 | -0.32 |
| <b>55+17+22 → 14+15+60</b>    | -1.75 | -1.74 | -1.84 | -1.88 | -1.90 | -2.16 | -2.22 | -1.88 | -1.90 | -2.08 |
| <b>56+2(17) → 63+2(14)</b>    | -0.42 | -0.31 | -0.34 | -0.36 | -0.38 | -0.63 | -0.57 | -0.44 | -0.35 | -0.41 |
| <b>57+2(17) → 63+2(14)</b>    | -1.15 | -0.90 | -0.94 | -0.96 | -0.97 | -1.47 | -1.30 | -1.21 | -0.97 | -1.04 |
| <b>58+17+22 → 14+15+60</b>    | -2.21 | -2.13 | -2.25 | -2.30 | -2.33 | -2.70 | -2.71 | -2.35 | -2.31 | -2.52 |
| <b>59+17+22 → 14+15+60</b>    | -2.19 | -2.08 | -2.21 | -2.27 | -2.31 | -2.69 | -2.68 | -2.34 | -2.27 | -2.52 |

---

**Table S11.** Hyperhomodesmotic bond separation reaction energies (kcal mol<sup>-1</sup>) for conjugated species (Set A).

| Reaction            | 6-31G(d) | B3LYP | 6-31G(d) | 6-31G(d) | 6-31G(d) | HF      | HF      | HF      | HF      | HF        |
|---------------------|----------|-------|----------|----------|----------|---------|---------|---------|---------|-----------|
|                     | B3LYP    | ZPVE  | M05-2X   | M06      | M06-2X   | cc-pVDZ | cc-pVTZ | cc-pVQZ | cc-pV5Z | CBS limit |
| 35+15 → 18+7        | 0.48     | 0.54  | 0.28     | 0.74     | 0.56     | 0.40    | 0.43    | 0.44    | 0.45    | 0.45      |
| 36+16 → 19+30       | 1.70     | 1.88  | 1.71     | 1.77     | 1.60     | 1.85    | 1.93    | 1.90    | 1.91    | 1.91      |
| 39+16 → 23+30       | 0.71     | 0.72  | 0.62     | 0.86     | 0.77     | 0.57    | 0.61    | 0.61    | 0.61    | 0.62      |
| 41+15 → 23+7        | 0.96     | 1.04  | 0.88     | 1.21     | 1.03     | 1.07    | 1.13    | 1.15    | 1.15    | 1.16      |
| 2+2(15) → 18+7+32   | 0.47     | 0.57  | 0.16     | 0.70     | 0.38     | 0.41    | 0.45    | 0.45    | 0.46    | 0.47      |
| 3+2(16) → 19+30+31  | 1.73     | 1.96  | 1.73     | 1.83     | 1.66     | 1.92    | 2.00    | 1.97    | 1.98    | 1.99      |
| 10+2(16) → 23+30+31 | 0.66     | 0.82  | 0.59     | 0.90     | 0.80     | 0.58    | 0.61    | 0.60    | 0.61    | 0.61      |
| 12+2(15) → 23+7+32  | 0.96     | 1.07  | 0.80     | 1.24     | 1.04     | 1.07    | 1.15    | 1.17    | 1.17    | 1.18      |
| 42+2(15) → 2(7)+18  | 0.75     | 0.91  | 0.48     | 0.99     | 0.63     | 0.56    | 0.58    | 0.59    | 0.59    | 0.59      |
| 43+2(16) → 2(30)+19 | 2.84     | 3.07  | 2.99     | 2.82     | 2.70     | 3.16    | 3.22    | 3.16    | 3.17    | 3.18      |
| 44+15+16 → 7+30+23  | 1.39     | 1.53  | 1.32     | 1.59     | 1.37     | 1.35    | 1.41    | 1.40    | 1.41    | 1.41      |
| 45+15+14 → 21+7+25  | 0.27     | -0.09 | 0.00     | -0.26    | -0.07    | 0.47    | 0.72    | 0.73    | 0.75    | 0.76      |
| 46+15 → 21+7        | 0.30     | 0.05  | 0.21     | 0.04     | 0.16     | 0.56    | 0.70    | 0.72    | 0.74    | 0.75      |
| 47+2(15) → 21+2(7)  | 0.28     | -0.09 | 0.05     | -0.09    | 0.21     | 0.79    | 1.01    | 1.02    | 1.06    | 1.08      |

  

| Reaction            | MP2     | MP2     | MP2     | MP2     | MP2       | CCSD    | CCSD    | CCSD(T) | CCSD(T) | <i>E</i> <sub>FPA</sub> |
|---------------------|---------|---------|---------|---------|-----------|---------|---------|---------|---------|-------------------------|
|                     | cc-pVDZ | cc-pVTZ | cc-pVQZ | cc-pV5Z | CBS limit | cc-pVDZ | cc-pVTZ | cc-pVDZ | cc-pVTZ | (no ZPVE)               |
| 35+15 → 18+7        | 0.51    | 0.57    | 0.58    | 0.59    | 0.59      | 0.33    | 0.40    | 0.48    | 0.42    | 0.45                    |
| 36+16 → 19+30       | 1.87    | 2.18    | 2.03    | 1.97    | 1.90      | 1.56    | 1.88    | 1.62    | 1.94    | 1.69                    |
| 39+16 → 23+30       | 0.83    | 0.95    | 0.91    | 0.85    | 0.78      | 0.61    | 0.72    | 0.67    | 0.79    | 0.63                    |
| 41+15 → 23+7        | 0.93    | 0.98    | 0.99    | 1.00    | 1.01      | 0.78    | 0.86    | 0.92    | 0.86    | 0.91                    |
| 2+2(15) → 18+7+32   | 0.66    | 0.72    | 0.72    | 0.63    | 0.54      | 0.41    | 0.48    | 0.59    | 0.53    | 0.37                    |
| 3+2(16) → 19+30+31  | 2.10    | 2.42    | 2.25    | 2.18    | 2.11      | 1.69    | 2.02    | 1.79    | 2.13    | 1.84                    |
| 10+2(16) → 23+30+31 | 0.97    | 1.10    | 1.04    | 0.97    | 0.89      | 0.71    | 0.81    | 0.78    | 0.91    | 0.72                    |
| 12+2(15) → 23+7+32  | 1.01    | 1.08    | 1.09    | 1.02    | 0.94      | 0.81    | 0.92    | 0.97    | 0.94    | 0.82                    |
| 42+2(15) → 2(7)+18  | 0.90    | 0.97    | 0.97    | 0.97    | 0.97      | 0.54    | 0.63    | 0.85    | 0.69    | 0.70                    |
| 43+2(16) → 2(30)+19 | 3.33    | 3.80    | 3.51    | 3.40    | 3.28      | 2.74    | 3.23    | 2.87    | 3.35    | 2.86                    |
| 44+15+16 → 7+30+23  | 1.59    | 1.72    | 1.65    | 1.60    | 1.54      | 1.22    | 1.37    | 1.42    | 1.45    | 1.29                    |
| 45+15+14 → 21+7+25  | 0.90    | 1.10    | 1.03    | 1.06    | 1.09      | 0.15    | 0.36    | 0.40    | 0.47    | 0.45                    |
| 46+15 → 21+7        | 0.67    | 0.85    | 0.83    | 0.86    | 0.88      | 0.23    | 0.40    | 0.42    | 0.46    | 0.49                    |
| 47+2(15) → 21+2(7)  | 1.14    | 1.45    | 1.38    | 1.43    | 1.46      | 0.29    | 0.58    | 0.67    | 0.71    | 0.71                    |

**Table S12.** Hyperhomodesmotic bond separation reaction energies (kcal mol<sup>-1</sup>) for non-conjugated species (Set B).

| Reaction            | 6-31G(d) | B3LYP | 6-31G(d) | 6-31G(d) | 6-31G(d) | HF      | HF      | HF      | HF      | HF        |
|---------------------|----------|-------|----------|----------|----------|---------|---------|---------|---------|-----------|
|                     | B3LYP    | ZPVE  | M05-2X   | M06      | M06-2X   | cc-pVDZ | cc-pVTZ | cc-pVQZ | cc-pV5Z | CBS limit |
| 29+14 → 2(25)       | -0.05    | -0.03 | -0.20    | 0.20     | 0.16     | -0.06   | -0.05   | -0.05   | -0.05   | -0.05     |
| 33+14 → 32+25       | 0.07     | 0.09  | 0.01     | 0.08     | 0.03     | 0.02    | 0.05    | 0.05    | 0.05    | 0.05      |
| 34+14 → 31+25       | 0.20     | 0.29  | 0.14     | 0.39     | 0.35     | 0.13    | 0.16    | 0.17    | 0.16    | 0.16      |
| 8+15 → 7+32         | 0.01     | 0.05  | -0.07    | 0.06     | -0.03    | 0.02    | 0.02    | 0.01    | 0.01    | 0.01      |
| 9+16 → 30+31        | -0.02    | -0.02 | -0.09    | 0.19     | 0.14     | 0.00    | -0.01   | -0.02   | -0.02   | -0.02     |
| 37+14 → 2(32)       | -0.07    | -0.07 | -0.01    | -0.04    | 0.00     | -0.09   | -0.15   | -0.18   | -0.20   | -0.21     |
| 38+14 → 2(31)       | -4.17    | -3.89 | -4.32    | -3.71    | -4.10    | -4.44   | -4.58   | -4.66   | -4.69   | -4.69     |
| 40+14 → 32+31       | -1.26    | -1.11 | -1.24    | -1.07    | -1.13    | -1.31   | -1.37   | -1.42   | -1.45   | -1.46     |
| 5+14+15 → 2(32)+7   | 0.03     | 0.08  | -0.11    | 0.24     | 0.01     | 0.05    | 0.00    | -0.03   | -0.05   | -0.05     |
| 6+14+16 → 2(31)+30  | -3.66    | -3.35 | -3.83    | -3.15    | -3.70    | -3.85   | -3.93   | -4.00   | -4.02   | -4.02     |
| 11+14+16 → 31+32+30 | -1.11    | -0.94 | -1.14    | -0.91    | -1.23    | -1.12   | -1.17   | -1.21   | -1.23   | -1.24     |
| 13+14+15 → 31+32+7  | -1.05    | -0.83 | -1.19    | -0.64    | -0.83    | -1.01   | -1.04   | -1.07   | -1.09   | -1.10     |
| 49+2(14) → 2(32)+25 | 0.06     | 0.15  | 0.08     | 0.03     | 0.08     | -0.05   | 0.00    | -0.02   | -0.03   | -0.03     |
| 50+2(14) → 2(31)+25 | -0.14    | -0.04 | -0.24    | 0.00     | -0.06    | -0.52   | -0.53   | -0.58   | -0.60   | -0.60     |
| 51+2(14) → 31+32+25 | 0.03     | 0.13  | -0.03    | 0.18     | 0.20     | -0.15   | -0.13   | -0.15   | -0.17   | -0.17     |
| 53+60 → 2(61)       | -0.23    | -0.18 | -0.55    | -0.59    | -0.67    | -0.31   | -0.30   | -0.29   | -0.29   | -0.29     |
| 54+14 → 61+25       | -0.16    | -0.12 | -0.30    | 0.18     | 0.08     | -0.23   | -0.24   | -0.24   | -0.24   | -0.25     |
| 55+15 → 62+32       | -0.12    | -0.04 | -0.06    | -0.10    | -0.02    | -0.10   | -0.12   | -0.12   | -0.12   | -0.12     |
| 56+14 → 64+25       | -0.10    | -0.11 | -0.28    | 0.21     | 0.16     | -0.16   | -0.15   | -0.15   | -0.15   | -0.16     |
| 57+63 → 2(64)       | -0.11    | -0.15 | -0.35    | 0.16     | 0.11     | -0.21   | -0.22   | -0.22   | -0.22   | -0.22     |
| 58+60 → 62+61       | -0.17    | -0.05 | -0.44    | -0.50    | -0.53    | -0.19   | -0.16   | -0.17   | -0.16   | -0.16     |
| 59+60 → 62+61       | -0.29    | -0.22 | -0.48    | -0.41    | -0.32    | -0.22   | -0.20   | -0.20   | -0.19   | -0.19     |

  

| Reaction            | MP2     | MP2     | MP2     | MP2     | MP2       | CCSD    | CCSD    | CCSD(T) | CCSD(T) | <i>E</i> <sub>FPA</sub> |
|---------------------|---------|---------|---------|---------|-----------|---------|---------|---------|---------|-------------------------|
|                     | cc-pVDZ | cc-pVTZ | cc-pVQZ | cc-pV5Z | CBS limit | cc-pVDZ | cc-pVTZ | cc-pVDZ | cc-pVTZ | (no ZPVE)               |
| 29+14 → 2(25)       | -0.03   | -0.02   | -0.02   | -0.02   | -0.03     | -0.03   | -0.02   | -0.02   | -0.01   | -0.03                   |
| 33+14 → 32+25       | 0.09    | 0.12    | 0.12    | 0.03    | -0.06     | 0.04    | 0.08    | 0.06    | 0.10    | 0.09                    |
| 34+14 → 31+25       | 0.16    | 0.21    | 0.22    | 0.20    | 0.19      | 0.09    | 0.16    | 0.09    | 0.17    | 0.16                    |
| 8+15 → 7+32         | 0.10    | 0.09    | 0.08    | 0.00    | -0.09     | 0.08    | 0.07    | 0.22    | 0.09    | 0.10                    |
| 9+16 → 30+31        | 0.11    | 0.10    | 0.09    | 0.01    | -0.06     | 0.09    | 0.07    | 0.11    | 0.10    | 0.11                    |
| 37+14 → 2(32)       | 0.13    | 0.02    | -0.03   | -0.22   | -0.41     | 0.05    | -0.05   | 0.08    | -0.02   | 0.13                    |
| 38+14 → 2(31)       | -3.62   | -3.80   | -3.90   | -3.96   | -4.01     | -3.63   | -3.83   | -3.64   | -3.81   | -3.62                   |
| 40+14 → 32+31       | -0.99   | -1.12   | -1.16   | -1.29   | -1.41     | -0.98   | -1.10   | -0.97   | -1.08   | -0.99                   |
| 5+14+15 → 2(32)+7   | 0.35    | 0.24    | 0.19    | 0.00    | -0.19     | 0.22    | 0.14    | 0.41    | 0.19    | 0.35                    |
| 6+14+16 → 2(31)+30  | -3.02   | -3.17   | -3.26   | -3.37   | -3.48     | -3.07   | -3.22   | -3.05   | -3.18   | -3.02                   |
| 11+14+16 → 31+32+30 | -0.69   | -0.82   | -0.87   | -1.05   | -1.23     | -0.72   | -0.84   | -0.68   | -0.80   | -0.69                   |
| 13+14+15 → 31+32+7  | -0.70   | -0.80   | -0.84   | -0.96   | -1.07     | -0.72   | -0.80   | -0.56   | -0.77   | -0.70                   |

|                            |       |       |       |       |       |       |       |       |       |       |
|----------------------------|-------|-------|-------|-------|-------|-------|-------|-------|-------|-------|
| <b>49+2(14) → 2(32)+25</b> | 0.15  | 0.19  | 0.17  | -0.01 | -0.20 | 0.03  | 0.09  | 0.08  | 0.14  | 0.15  |
| <b>50+2(14) → 2(31)+25</b> | -0.30 | -0.22 | -0.27 | -0.32 | -0.35 | -0.48 | -0.38 | -0.47 | -0.34 | -0.30 |
| <b>51+2(14) → 31+32+25</b> | 0.02  | 0.07  | 0.05  | -0.07 | -0.18 | -0.12 | -0.04 | -0.09 | 0.00  | 0.02  |
| <b>53+60 → 2(61)</b>       | -0.16 | -0.27 | -0.33 | -0.34 | -0.35 | -0.26 | -0.35 | -0.22 | -0.32 | -0.16 |
| <b>54+14 → 61+25</b>       | -0.08 | -0.11 | -0.11 | -0.12 | -0.12 | -0.11 | -0.13 | -0.07 | -0.09 | -0.08 |
| <b>55+15 → 62+32</b>       | 0.16  | 0.13  | 0.12  | 0.03  | -0.07 | 0.09  | 0.06  | 0.14  | 0.11  | 0.16  |
| <b>56+14 → 64+25</b>       | 0.00  | 0.00  | -0.02 | -0.02 | -0.03 | -0.02 | -0.03 | 0.01  | 0.00  | 0.00  |
| <b>57+63 → 2(64)</b>       | -0.13 | -0.11 | -0.12 | -0.12 | -0.12 | -0.14 | -0.13 | -0.12 | -0.11 | -0.13 |
| <b>58+60 → 62+61</b>       | -0.04 | -0.15 | -0.21 | -0.21 | -0.22 | -0.15 | -0.23 | -0.10 | -0.20 | -0.04 |
| <b>59+60 → 62+61</b>       | -0.02 | -0.09 | -0.17 | -0.18 | -0.20 | -0.14 | -0.21 | -0.09 | -0.17 | -0.02 |

---

**Table S13.** Atomization energies and isogyric, isodesmic, hypohomodesmotic, homodesmotic, and hyperhomodesmotic bond separation reaction energies (kcal mol<sup>-1</sup>) for cyclopentadiene and 1,3-cyclohexadiene.

|                                    | 6-31G(d)<br>B3LYP | B3LYP<br>ZPVE  | 6-31G(d)<br>M05-2X | 6-31G(d)<br>M06 | 6-31G(d)<br>M06-2X | HF<br>cc-pVDZ   | HF<br>cc-pVTZ   | HF<br>cc-pVQZ      | HF<br>cc-pV5Z      | HF<br>CBS limit                      |
|------------------------------------|-------------------|----------------|--------------------|-----------------|--------------------|-----------------|-----------------|--------------------|--------------------|--------------------------------------|
| <b>Atomization</b>                 |                   |                |                    |                 |                    |                 |                 |                    |                    |                                      |
| cyclopentadiene                    | 1172.20           | 1113.91        | 1176.17            | 1178.67         | 1179.70            | 878.79          | 894.07          | 896.16             | 896.73             | 896.91                               |
| 1,3-cyclohexadiene                 | 1467.79           | 1390.71        | 1472.53            | 1476.12         | 1477.40            | 1105.26         | 1123.48         | 1125.89            | 1126.53            | 1126.72                              |
| <b>Isogyric Reactions</b>          |                   |                |                    |                 |                    |                 |                 |                    |                    |                                      |
| 52+7(65) → 5(24)                   | -164.71           | -125.69        | -170.44            | -164.37         | -162.95            | -178.33         | -174.38         | -173.39            | -173.22            | -173.18                              |
| 1+8(65) → 6(24)                    | -180.41           | -138.17        | -185.54            | -178.48         | -176.55            | -195.96         | -192.13         | -191.10            | -190.94            | -190.92                              |
| <b>Isodesmic Reactions</b>         |                   |                |                    |                 |                    |                 |                 |                    |                    |                                      |
| 52+5(24) → 3(17)+2(22)             | 16.82             | 22.58          | 16.60              | 18.21           | 16.05              | 10.72           | 10.95           | 10.90              | 10.86              | 10.85                                |
| 1+6(24) → 4(17)+2(22)              | 20.49             | 26.30          | 20.59              | 22.49           | 20.36              | 14.29           | 14.48           | 14.39              | 14.33              | 14.30                                |
| <b>Hypohomodesmotic Reactions</b>  |                   |                |                    |                 |                    |                 |                 |                    |                    |                                      |
| 52+3(17)+2(22) → 4(15)+14          | -4.56             | -2.39          | -5.01              | -5.66           | -5.90              | -5.28           | -4.99           | -5.01              | -4.99              | -4.97                                |
| 1+4(17)+2(22) → 4(15)+2(14)        | -2.02             | -0.51          | -2.83              | -3.11           | -3.34              | -2.55           | -2.38           | -2.42              | -2.42              | -2.41                                |
| <b>Homodesmotic Reactions</b>      |                   |                |                    |                 |                    |                 |                 |                    |                    |                                      |
| 52+2(17)+2(22) → 2(15)+14+18       | -9.22             | -6.73          | -8.85              | -9.71           | -9.61              | -8.28           | -7.90           | -7.84              | -7.79              | -7.75                                |
| 1+3(17)+2(22) → 2(15)+2(14)+18     | -6.68             | -4.84          | -6.68              | -7.15           | -7.05              | -5.55           | -5.29           | -5.25              | -5.21              | -5.18                                |
| <b>Hyperhomodesmotic Reactions</b> |                   |                |                    |                 |                    |                 |                 |                    |                    |                                      |
| 52+2(15)+3(14) → 2(7)+2(25)+18     | -8.25             | -6.50          | -8.33              | -9.13           | -9.21              | -7.03           | -6.32           | -6.22              | -6.12              | -6.06                                |
| 1+2(15)+4(14) → 18+2(7)+3(25)      | -5.70             | -4.71          | -6.20              | -6.70           | -6.77              | -4.27           | -3.63           | -3.55              | -3.47              | -3.41                                |
|                                    | MP2<br>cc-pVDZ    | MP2<br>cc-pVTZ | MP2<br>cc-pVQZ     | MP2<br>cc-pV5Z  | MP2<br>CBS limit   | CCSD<br>cc-pVDZ | CCSD<br>cc-pVTZ | CCSD(T)<br>cc-pVDZ | CCSD(T)<br>cc-pVTZ | <i>E</i> <sub>FPA</sub><br>(no ZPVE) |
| <b>Atomization</b>                 |                   |                |                    |                 |                    |                 |                 |                    |                    |                                      |
| cyclopentadiene                    | 1125.91           | 1180.85        | 1197.42            | 1203.14         | 1208.72            | 1081.78         | 1131.03         | 1096.60            | 1150.63            | 1181.88                              |
| 1,3-cyclohexadiene                 | 1406.56           | 1474.00        | 1494.08            | 1500.95         | 1507.68            | 1357.44         | 1418.03         | 1374.59            | 1440.86            | 1478.57                              |
| <b>Isogyric Reactions</b>          |                   |                |                    |                 |                    |                 |                 |                    |                    |                                      |
| 52+7(65) → 5(24)                   | -151.95           | -151.95        | -150.38            | -149.31         | -148.34            | -161.62         | -162.08         | -155.43            | -155.58            | -151.98                              |
| 1+8(65) → 6(24)                    | -166.16           | -166.77        | -165.11            | -163.98         | -162.93            | -176.03         | -177.05         | -169.23            | -169.94            | -166.13                              |
| <b>Isodesmic Reactions</b>         |                   |                |                    |                 |                    |                 |                 |                    |                    |                                      |
| 52+5(24) → 3(17)+2(22)             | 19.49             | 20.92          | 21.31              | 21.29           | 21.30              | 13.22           | 14.36           | 14.83              | 16.15              | 16.84                                |
| 1+6(24) → 4(17)+2(22)              | 22.66             | 24.13          | 24.47              | 24.37           | 24.30              | 17.25           | 18.41           | 18.91              | 20.24              | 20.73                                |
| <b>Hypohomodesmotic Reactions</b>  |                   |                |                    |                 |                    |                 |                 |                    |                    |                                      |
| 52+3(17)+2(22) → 4(15)+14          | -2.26             | -2.20          | -2.29              | -2.20           | -2.10              | -4.82           | -4.86           | -4.21              | -4.23              | -4.12                                |
| 1+4(17)+2(22) → 4(15)+2(14)        | -1.19             | -1.27          | -1.48              | -1.46           | -1.43              | -2.48           | -2.63           | -1.99              | -2.17              | -2.32                                |
| <b>Homodesmotic Reactions</b>      |                   |                |                    |                 |                    |                 |                 |                    |                    |                                      |
| 52+2(17)+2(22) → 2(15)+14+18       | -6.30             | -6.07          | -6.02              | -5.90           | -5.80              | -8.06           | -7.89           | -7.89              | -7.68              | -7.40                                |
| 1+3(17)+2(22) → 2(15)+2(14)+18     | -5.23             | -5.14          | -5.22              | -5.16           | -5.12              | -5.71           | -5.66           | -5.67              | -5.63              | -5.61                                |
| <b>Hyperhomodesmotic Reactions</b> |                   |                |                    |                 |                    |                 |                 |                    |                    |                                      |

|                                       |       |       |       |       |       |       |       |       |       |       |
|---------------------------------------|-------|-------|-------|-------|-------|-------|-------|-------|-------|-------|
| <b>52+2(15)+3(14) → 2(7)+2(25)+18</b> | -5.99 | -5.50 | -5.39 | -5.20 | -5.04 | -7.66 | -7.18 | -7.43 | -7.16 | -6.68 |
| <b>1+2(15)+4(14) → 18+2(7)+3(25)</b>  | -5.00 | -4.65 | -4.67 | -4.54 | -4.43 | -5.37 | -5.00 | -5.31 | -5.19 | -4.96 |

---

**Table S14.** Comparison of reaction energies (kcal mol<sup>-1</sup>) for prototype hypohomodesmotic reactions.

| Reaction                    |      | E <sub>FPA</sub> | G3    | CBS-QB3 |
|-----------------------------|------|------------------|-------|---------|
| <b>18+17</b> → <b>2(15)</b> | (17) | 2.96             | 3.18  | 3.20    |
| <b>19+17</b> → <b>2(16)</b> | (18) | -1.88            | -1.29 | -1.11   |
| <b>23+17</b> → <b>15+16</b> | (19) | -0.18            | 0.19  | 0.08    |
| <b>18+16</b> → <b>23+15</b> | (20) | 3.14             | 3.00  | 3.12    |
| <b>21+22</b> → <b>2(20)</b> | (21) | -1.70            | -1.47 | -1.20   |
| <b>18+19</b> → <b>2(23)</b> | (22) | 1.44             | 1.53  | 1.92    |
| <b>19+15</b> → <b>23+16</b> | (23) | 1.10             | 1.29  | 1.23    |

**Table S15.** Comparison of atomization energies (kcal mol<sup>-1</sup>) for conjugated hydrocarbons (Set A).

| Molecule           | E <sub>FPA</sub> | G3      | CBS-QB3 |
|--------------------|------------------|---------|---------|
| 1,3-pentadiene     | 1239.70          | 1258.54 | 1237.34 |
| 1,3-pentadiyne     | 955.41           | 969.40  | 954.29  |
| penta-1-ene-3-yne  | 1097.19          | 1113.86 | 1095.40 |
| penta-1-yne-3-ene  | 1095.72          | 1111.88 | 1093.56 |
| 1,3-hexadiene      | 1516.45          | 1539.62 | 1513.63 |
| 1,3-hexadiyne      | 1231.93          | 1250.26 | 1230.33 |
| hexa-1-ene-3-yne   | 1373.75          | 1394.70 | 1371.62 |
| hexa-1-yne-3-ene   | 1372.46          | 1392.92 | 1369.80 |
| 2,4-hexadiene      | 1519.38          | 1542.54 | 1516.65 |
| 2,4-hexadiyne      | 1237.78          | 1256.41 | 1236.70 |
| hexa-2-ene-4-yne   | 1377.32          | 1398.21 | 1375.19 |
| 1,2,3-hexatriene   | 1363.73          | 1385.30 | 1362.04 |
| 1,2,3-pentatriene  | 1086.85          | 1104.11 | 1085.66 |
| E-2,3,4-hexatriene | 1366.28          | 1387.83 | 1364.69 |

**Table S16.** Comparison of atomization energies (kcal mol<sup>-1</sup>) for non-conjugated hydrocarbons (Set B).

| Molecule             | E <sub>FPA</sub> | G3      | CBS-QB3 |
|----------------------|------------------|---------|---------|
| pentane              | 1497.68          | 1521.89 | 1495.05 |
| 1-pentene            | 1365.60          | 1387.06 | 1362.98 |
| 1-pentyne            | 1224.10          | 1242.75 | 1221.61 |
| 2-pentene            | 1367.90          | 1389.43 | 1365.43 |
| 2-pentyne            | 1227.92          | 1247.15 | 1226.05 |
| 1,4-pentadiene       | 1233.20          | 1251.96 | 1230.64 |
| 1,4-pentadiyne       | 946.29           | 959.44  | 944.10  |
| penta-1-ene-4-yne    | 1090.62          | 1106.56 | 1088.19 |
| 1,4-hexadiene        | 1512.79          | 1535.91 | 1509.85 |
| 1,4-hexadiyne        | 1228.02          | 1245.86 | 1225.86 |
| hexa-1-ene-4-yne     | 1371.96          | 1392.65 | 1369.65 |
| hexa-1-yne-4-ene     | 1370.35          | 1390.61 | 1367.54 |
| 1,5-hexadiene        | 1510.51          | 1533.50 | 1507.40 |
| 1,5-hexadiyne        | 1226.70          | 1244.21 | 1223.91 |
| hexa-1-ene-5-yne     | 1368.72          | 1388.96 | 1365.77 |
| 2-ethyl-1-butene     | 1645.03          | 1671.03 | 1642.22 |
| 2-methyl-1-pentene   | 1645.85          | 1671.75 | 1642.95 |
| 2-methyl-2-pentene   | 1647.00          | 1672.95 | 1644.31 |
| 2-methylpentane      | 1775.88          | 1804.64 | 1772.97 |
| 3-methylpentane      | 1775.19          | 1804.01 | 1772.34 |
| E-3-methyl-2-pentene | 1646.56          | 1672.58 | 1643.92 |
| Z-3-methyl-2-pentene | 1646.51          | 1672.65 | 1643.91 |

**Table S17.** Comparison of Isogyric bond separation reaction energies (kcal mol<sup>-1</sup>) for conjugated species (Set A).

|                         | E <sub>FPA</sub> | G3      | CBS-QB3 |
|-------------------------|------------------|---------|---------|
| <b>35+6(65) → 5(24)</b> | -101.09          | -101.85 | -98.07  |
| <b>36+8(65) → 5(24)</b> | -177.80          | -177.51 | -172.22 |
| <b>39+7(65) → 5(24)</b> | -139.81          | -139.79 | -135.56 |
| <b>41+7(65) → 5(24)</b> | -141.29          | -141.77 | -137.40 |
| <b>2+7(65) → 6(24)</b>  | -113.25          | -114.19 | -109.74 |
| <b>3+9(65) → 6(24)</b>  | -190.20          | -190.07 | -184.15 |
| <b>10+8(65) → 6(24)</b> | -152.17          | -152.38 | -147.31 |
| <b>12+8(65) → 6(24)</b> | -153.46          | -154.15 | -149.13 |
| <b>42+7(65) → 6(24)</b> | -110.32          | -111.27 | -106.73 |
| <b>43+9(65) → 6(24)</b> | -184.34          | -183.93 | -177.78 |
| <b>44+8(65) → 6(24)</b> | -148.60          | -148.86 | -143.74 |
| <b>45+8(65) → 6(24)</b> | -162.18          | -161.77 | -156.89 |
| <b>46+9(65) → 5(24)</b> | -150.15          | -149.54 | -145.30 |
| <b>47+8(65) → 6(24)</b> | -159.64          | -159.24 | -154.24 |



**Table S18.** Comparison of isogyric bond separation reaction energies (kcal mol<sup>-1</sup>) for non-conjugated species (Set B).

| Reaction         | E <sub>FPA</sub> | G3      | CBS-QB3 |
|------------------|------------------|---------|---------|
| 29+4(65) → 5(24) | -50.69           | -51.98  | -49.25  |
| 33+5(65) → 5(24) | -78.98           | -80.07  | -76.87  |
| 34+6(65) → 5(24) | -116.69          | -117.63 | -113.80 |
| 8+5(65) → 5(24)  | -76.68           | -77.70  | -74.43  |
| 9+6(65) → 5(24)  | -112.87          | -113.24 | -109.35 |
| 37+6(65) → 5(24) | -107.59          | -108.43 | -104.77 |
| 38+8(65) → 5(24) | -186.92          | -187.47 | -182.42 |
| 40+7(65) → 5(24) | -146.38          | -147.09 | -142.77 |
| 5+7(65) → 6(24)  | -116.92          | -117.90 | -113.52 |
| 6+9(65) → 6(24)  | -194.11          | -194.48 | -188.62 |
| 11+8(65) → 6(24) | -153.96          | -154.42 | -149.28 |
| 13+8(65) → 6(24) | -155.57          | -156.46 | -151.39 |
| 49+7(65) → 6(24) | -119.19          | -120.32 | -115.98 |
| 50+9(65) → 6(24) | -195.43          | -196.13 | -190.57 |
| 51+8(65) → 6(24) | -157.19          | -158.12 | -153.16 |
| 53+6(65) → 6(24) | -88.46           | -89.53  | -85.60  |
| 54+6(65) → 6(24) | -87.64           | -88.80  | -84.88  |
| 55+6(65) → 6(24) | -86.49           | -87.60  | -83.52  |
| 56+5(65) → 6(24) | -61.41           | -62.65  | -59.30  |
| 57+5(65) → 6(24) | -62.09           | -63.28  | -59.93  |
| 58+6(65) → 6(24) | -86.94           | -87.97  | -83.91  |
| 59+6(65) → 6(24) | -86.99           | -87.90  | -83.91  |

**Table S19.** Comparison of isodesmic bond separation reaction energies (kcal mol<sup>-1</sup>) for conjugated species (Set A).

| Reaction               | E <sub>FPA</sub> | G3    | CBS-QB3 |
|------------------------|------------------|-------|---------|
| 35+3(24) → 2(17)+2(22) | 19.62            | 20.57 | 20.61   |
| 36+3(24) → 2(17)+2(26) | 22.78            | 25.31 | 25.69   |
| 39+3(24) → 2(17)+22+26 | 20.84            | 22.83 | 22.73   |
| 41+3(24) → 2(17)+22+26 | 19.36            | 20.86 | 20.90   |
| 2+4(24) → 3(17)+2(22)  | 22.32            | 23.59 | 23.60   |
| 3+4(24) → 3(17)+2(26)  | 25.25            | 28.10 | 28.41   |
| 10+4(24) → 3(17)+22+26 | 23.34            | 25.60 | 25.64   |
| 12+4(24) → 3(17)+22+26 | 22.05            | 23.83 | 23.83   |
| 42+4(24) → 3(17)+2(22) | 25.25            | 26.51 | 26.61   |
| 43+4(24) → 3(17)+2(26) | 31.10            | 34.25 | 34.78   |
| 44+4(24) → 3(17)+22+26 | 26.91            | 29.11 | 29.21   |
| 45+4(24) → 2(17)+3(22) | 4.02             | 6.50  | 6.47    |
| 46+3(24) → 17+3(22)    | 1.18             | 3.38  | 3.40    |
| 47+4(24) → 2(17)+3(22) | 6.56             | 9.03  | 9.12    |

**Table S20.** Comparison of isodesmic bond separation reaction energies (kcal mol<sup>-1</sup>) for non-conjugated species (Set B).

| Reaction               | E <sub>FPA</sub> | G3    | CBS-QB3 |
|------------------------|------------------|-------|---------|
| 29+3(24) → 4(17)       | 8.77             | 9.45  | 9.38    |
| 33+3(24) → 22+3(17)    | 11.11            | 11.86 | 11.78   |
| 34+3(24) → 26+3(17)    | 13.32            | 14.49 | 14.47   |
| 8+3(24) → 3(17)+22     | 13.40            | 14.23 | 14.23   |
| 9+3(24) → 3(17)+26     | 17.15            | 18.88 | 18.92   |
| 37+3(24) → 2(22)+2(17) | 13.11            | 13.99 | 13.91   |
| 38+3(24) → 2(26)+2(17) | 13.67            | 15.36 | 15.49   |
| 40+3(24) → 22+26+2(17) | 14.26            | 15.53 | 15.53   |
| 5+4(24) → 3(17)+2(22)  | 18.65            | 19.88 | 19.81   |
| 6+4(24) → 3(17)+2(26)  | 21.33            | 23.70 | 23.94   |
| 11+4(24) → 3(17)+22+26 | 21.55            | 23.56 | 23.67   |
| 13+4(24) → 3(17)+22+26 | 19.94            | 21.52 | 21.56   |
| 49+4(24) → 2(22)+3(17) | 16.38            | 17.46 | 17.36   |
| 50+4(24) → 2(26)+3(17) | 20.02            | 22.05 | 21.99   |
| 51+4(24) → 22+26+3(17) | 18.32            | 19.86 | 19.79   |
| 53+4(24) → 4(17)+22    | 16.48            | 17.75 | 17.71   |
| 54+4(24) → 4(17)+22    | 17.30            | 18.48 | 18.44   |
| 55+4(24) → 4(17)+22    | 18.45            | 19.68 | 19.80   |
| 56+4(24) → 5(17)       | 12.91            | 14.13 | 13.99   |
| 57+4(24) → 5(17)       | 12.22            | 13.50 | 13.36   |
| 58+4(24) → 4(17)+22    | 18.01            | 19.31 | 19.41   |
| 59+4(24) → 4(17)+22    | 17.96            | 19.37 | 19.40   |

**Table S21.** Comparison of hypohomodesmotic bond separation reaction energies (kcal mol<sup>-1</sup>) for conjugated species (Set A).

| Reaction                  | E <sub>FPA</sub> | G3    | CBS-QB3 |
|---------------------------|------------------|-------|---------|
| 35+17+22 → 3(15)          | 3.30             | 3.62  | 3.66    |
| 36+17+26 → 3(16)          | -0.74            | -0.32 | -0.18   |
| 39+17+26 → 15+2(16)       | -0.28            | 0.09  | -0.17   |
| 41+17+22 → 2(15)+16       | 0.65             | 1.01  | 0.97    |
| 2+2(17)+22 → 3(15)+14     | 3.20             | 3.67  | 3.67    |
| 3+2(17)+26 → 3(16)+14     | -1.07            | -0.50 | -0.42   |
| 10+2(17)+26 → 15+2(16)+14 | -0.58            | -0.11 | -0.22   |
| 12+2(17)+22 → 2(15)+16+14 | 0.53             | 1.02  | 0.93    |
| 42+17+2(22) → 4(15)       | 3.50             | 3.91  | 4.00    |
| 43+17+2(26) → 4(16)       | -0.25            | 0.07  | 0.29    |
| 44+17+22+26 → 2(15)+2(16) | 0.36             | 0.73  | 0.66    |
| 45+2(22)+17 → 2(20)+15+14 | 1.20             | 1.58  | 1.51    |
| 46+2(22) → 2(20)+15       | 1.17             | 1.42  | 1.41    |
| 47+3(22) → 2(20)+2(15)    | 1.11             | 1.43  | 1.48    |

**Table S22.** Comparison of homodesmotic bond separation reaction energies (kcal mol<sup>-1</sup>) for conjugated species (Set A).

| Reaction            | E <sub>FPA</sub> | G3    | CBS-QB3 |
|---------------------|------------------|-------|---------|
| 35+22 → 18+15       | 0.35             | 0.44  | 0.46    |
| 36+26 → 19+16       | 1.14             | 0.96  | 0.93    |
| 39+26 → 23+16       | -0.09            | -0.09 | -0.25   |
| 41+22 → 23+15       | 0.83             | 0.83  | 0.89    |
| 2+22+17 → 18+14+15  | 0.25             | 0.49  | 0.47    |
| 3+26+17 → 19+14+16  | 0.80             | 0.79  | 0.69    |
| 10+26+17 → 23+14+16 | -0.40            | -0.29 | -0.30   |
| 12+22+17 → 23+14+15 | 0.71             | 0.83  | 0.85    |
| 42+2(22) → 2(15)+18 | 0.54             | 0.72  | 0.81    |
| 43+2(26) → 2(16)+19 | 1.62             | 1.36  | 1.41    |
| 44+22+26 → 15+16+23 | 0.54             | 0.54  | 0.58    |
| 45+22+17 → 21+15+14 | 0.10             | 0.29  | 0.29    |
| 46+22 → 21+15       | 0.07             | 0.14  | 0.18    |
| 47+2(22) → 21+2(15) | 0.01             | 0.14  | 0.25    |

**Table S23.** Comparison of homodesmotic bond separation reaction energies (kcal mol<sup>-1</sup>) for non-conjugated species (Set B).

| Reaction                  | E <sub>FPA</sub> | G3    | CBS-QB3 |
|---------------------------|------------------|-------|---------|
| 29+2(17) → 3(14)          | 0.36             | 0.55  | 0.47    |
| 33+2(17) → 15+2(14)       | 0.06             | 0.27  | 0.19    |
| 34+2(17) → 16+2(14)       | -0.12            | 0.01  | -0.09   |
| 8+17+22 → 2(15)+14        | -0.28            | -0.04 | -0.04   |
| 9+26+17 → 2(16)+14        | -1.33            | -1.17 | -1.30   |
| 37+2(17) → 2(15)+14       | -0.56            | -0.27 | -0.36   |
| 38+2(17) → 2(16)+14       | -4.81            | -4.70 | -4.72   |
| 40+2(17) → 15+16+14       | -1.82            | -1.63 | -1.72   |
| 5+2(17)+22 → 3(15)+14     | -0.46            | -0.04 | -0.11   |
| 6+2(17)+26 → 3(16)+14     | -4.99            | -4.90 | -4.90   |
| 11+2(17)+26 → 2(16)+15+14 | -2.37            | -2.15 | -2.20   |
| 13+2(17)+22 → 16+2(15)+14 | -1.58            | -1.29 | -1.33   |
| 49+3(17) → 2(15)+2(14)    | -0.10            | 0.23  | 0.12    |
| 50+3(17) → 2(16)+2(14)    | -1.27            | -0.97 | -1.19   |
| 51+3(17) → 15+16+2(14)    | -0.57            | -0.27 | -0.42   |
| 53+2(17) → 2(14)+60       | -1.06            | -0.70 | -0.83   |
| 54+2(17) → 2(14)+60       | -0.24            | 0.02  | -0.11   |
| 55+17+22 → 14+15+60       | -1.73            | -1.46 | -1.43   |
| 56+2(17) → 63+2(14)       | -0.25            | 0.13  | -0.04   |
| 57+2(17) → 63+2(14)       | -0.94            | -0.50 | -0.67   |
| 58+17+22 → 14+15+60       | -2.17            | -1.83 | -1.82   |
| 59+17+22 → 14+15+60       | -2.22            | -1.76 | -1.82   |

**Table S24.** Comparison of hyperhomodesmotic bond separation reaction energies (kcal mol<sup>-1</sup>) for conjugated species (Set A).

| Reaction            | E <sub>FFPA</sub> | G3   | CBS-QB3 |
|---------------------|-------------------|------|---------|
| 35+15 → 18+7        | 0.51              | 0.50 | 0.48    |
| 36+16 → 19+30       | 1.87              | 1.83 | 1.75    |
| 39+16 → 23+30       | 0.64              | 0.77 | 0.57    |
| 41+15 → 23+7        | 0.99              | 0.89 | 0.91    |
| 2+2(15) → 18+7+32   | 0.47              | 0.67 | 0.65    |
| 3+2(16) → 19+30+31  | 2.07              | 2.07 | 2.05    |
| 10+2(16) → 23+30+31 | 0.87              | 0.99 | 1.05    |
| 12+2(15) → 23+7+32  | 0.93              | 1.01 | 1.02    |
| 42+2(15) → 2(7)+18  | 0.87              | 0.84 | 0.86    |
| 43+2(16) → 2(30)+19 | 3.09              | 3.09 | 3.03    |
| 44+15+16 → 7+30+23  | 1.44              | 1.46 | 1.42    |
| 45+15+14 → 21+7+25  | 0.09              | 0.08 | 0.08    |
| 46+15 → 21+7        | 0.24              | 0.19 | 0.21    |
| 47+2(15) → 21+2(7)  | 0.34              | 0.25 | 0.30    |

**Table S25.** Comparison of hyperhomodesmotic bond separation reaction energies (kcal mol<sup>-1</sup>) for non-conjugated species (Set B).

| Reaction            | E <sub>FFPA</sub> | G3    | CBS-QB3 |
|---------------------|-------------------|-------|---------|
| 29+14 → 2(25)       | 0.00              | 0.00  | 0.02    |
| 33+14 → 32+25       | -0.06             | 0.12  | 0.11    |
| 34+14 → 31+25       | 0.24              | 0.15  | 0.22    |
| 8+15 → 7+32         | -0.06             | 0.14  | 0.13    |
| 9+16 → 30+31        | -0.06             | 0.11  | 0.06    |
| 37+14 → 2(32)       | -0.45             | -0.03 | -0.06   |
| 38+14 → 2(31)       | -3.74             | -3.87 | -3.64   |
| 40+14 → 32+31       | -1.22             | -1.09 | -1.03   |
| 5+14+15 → 2(32)+7   | -0.19             | 0.26  | 0.22    |
| 6+14+16 → 2(31)+30  | -3.18             | -3.20 | -3.00   |
| 11+14+16 → 31+32+30 | -1.04             | -0.75 | -0.69   |
| 13+14+15 → 31+32+7  | -0.82             | -0.70 | -0.62   |
| 49+2(14) → 2(32)+25 | -0.16             | 0.20  | 0.18    |
| 50+2(14) → 2(31)+25 | -0.38             | -0.41 | -0.33   |
| 51+2(14) → 31+32+25 | -0.15             | -0.01 | 0.04    |
| 53+60 → 2(61)       | -0.37             | -0.23 | -0.27   |
| 54+14 → 61+25       | -0.07             | -0.02 | -0.06   |
| 55+15 → 62+32       | -0.02             | 0.20  | 0.18    |
| 56+14 → 64+25       | -0.04             | 0.07  | 0.00    |
| 57+63 → 2(64)       | -0.15             | -0.07 | -0.13   |
| 58+60 → 62+61       | -0.17             | -0.06 | -0.08   |
| 59+60 → 62+61       | -0.22             | 0.01  | -0.08   |

**Table S26.** Comparison of atomization energies and isogyric, isodesmic, hypohomodesmotic, homodesmotic, and hyperhomodesmotic bond separation reaction energies (kcal mol<sup>-1</sup>) for cyclopentadiene and 1,3-cyclohexadiene.

| <b>Reaction</b>                       | <b>E<sub>FPA</sub></b> | <b>G3</b> | <b>CBS-QB3</b> |
|---------------------------------------|------------------------|-----------|----------------|
| <b>Atomization</b>                    |                        |           |                |
| cyclopentadiene                       | 1123.58                | 1139.02   | 1121.33        |
| 1,3-cyclohexadiene                    | 1401.49                | 1421.77   | 1398.99        |
| <b>Isogyric Reactions</b>             |                        |           |                |
| <b>52+7(65) → 5(24)</b>               | -112.97                | -114.63   | -109.63        |
| <b>1+8(65) → 6(24)</b>                | -123.89                | -125.30   | -119.94        |
| <b>Isodesmic Reactions</b>            |                        |           |                |
| <b>52+5(24) → 3(17)+2(22)</b>         | 22.61                  | 23.15     | 23.71          |
| <b>1+6(24) → 4(17)+2(22)</b>          | 26.55                  | 27.83     | 28.06          |
| <b>Hypohomodesmotic Reactions</b>     |                        |           |                |
| <b>52+3(17)+2(22) → 4(15)+14</b>      | -1.95                  | -2.42     | -1.86          |
| <b>1+4(17)+2(22) → 4(15)+2(14)</b>    | -0.81                  | -0.70     | -0.49          |
| <b>Homodesmotic Reactions</b>         |                        |           |                |
| <b>52+2(17)+2(22) → 2(15)+14+18</b>   | -4.90                  | -5.60     | -5.06          |
| <b>1+3(17)+2(22) → 2(15)+2(14)+18</b> | -3.77                  | -3.88     | -3.69          |
| <b>Hyperhomodesmotic Reactions</b>    |                        |           |                |
| <b>52+2(15)+3(14) → 2(7)+2(25)+18</b> | -4.93                  | -6.03     | -5.47          |
| <b>1+2(15)+4(14) → 18+2(7)+3(25)</b>  | -3.97                  | -4.59     | -4.32          |

**Table S27.** Incremental valence focal point table (kcal mol<sup>-1</sup>) for the isodesmic bond separation reactions of 1,3,5-hexatriyne and 1,3,5,7-octatetrayne.<sup>a</sup>

| Basis Set   | $\Delta E_c[\text{RHF}]$                                                                                                                                        | $+\delta[\text{MP2}]$ | $+\delta[\text{CCSD}]$ | $+\delta[\text{CCSD(T)}]$ | $+\delta[\text{CCSDT}]$ | $\Delta E(\text{V})$ |
|-------------|-----------------------------------------------------------------------------------------------------------------------------------------------------------------|-----------------------|------------------------|---------------------------|-------------------------|----------------------|
|             | $\equiv\equiv\equiv + 4 \text{ CH}_4 \longrightarrow 3 \equiv + 2 \text{ —}$                                                                                    |                       |                        |                           |                         |                      |
| cc-pVDZ     | 25.1                                                                                                                                                            | +10.29                | -9.01                  | +2.83                     | -0.46                   | [+28.75]             |
| cc-pVTZ     | 24.37                                                                                                                                                           | +12.24                | -9.32                  | +2.91                     | [-0.46]                 | [+29.74]             |
| cc-pVQZ     | 23.95                                                                                                                                                           | +12.05                | -9.28                  | +2.98                     | [-0.46]                 | [+29.23]             |
| cc-pV5Z     | 23.85                                                                                                                                                           | +11.57                | [-8.86]                | [+3.01]                   | [-0.46]                 | [+29.10]             |
| CBS Limit   | [+23.82]                                                                                                                                                        | [+11.07]              | [-8.42]                | [+3.03]                   | [-0.46]                 | [+29.03]             |
|             | $\Delta E^{\text{FPA}} = \Delta E(\text{V}) + \Delta E(\text{core}) + \Delta E(\text{ZPVE}) = 29.03 + 2.23 + 0.43 = 31.69 \text{ kcal mol}^{-1}$ ;              |                       |                        |                           |                         |                      |
|             | $\Delta H_f^{0K}(\text{C}_6\text{H}_2) = 163.4 \pm 2.1 \text{ kcal mol}^{-1}$ ; $\Delta H_f^{298K}(\text{C}_6\text{H}_2) = 164.9 \pm 2.1 \text{ kcal mol}^{-1}$ |                       |                        |                           |                         |                      |
|             | $\equiv\equiv\equiv\equiv + 6 \text{ CH}_4 \longrightarrow 4 \equiv + 3 \text{ —}$                                                                              |                       |                        |                           |                         |                      |
| cc-pVDZ     | 37.93                                                                                                                                                           | +17.10                | -14.8                  | +4.64                     | -0.78                   | [+44.08]             |
| cc-pVTZ     | 36.71                                                                                                                                                           | +20.13                | -15.28                 | +4.78                     | [-0.78]                 | [+45.56]             |
| cc-pVQZ     | 36.08                                                                                                                                                           | +19.82                | -15.22                 | +4.88                     | [-0.78]                 | [+44.78]             |
| cc-pV5Z     | 35.93                                                                                                                                                           | +19.09                | [-14.59]               | [+4.92]                   | [-0.78]                 | [+44.57]             |
| CBS Limit   | [+35.88]                                                                                                                                                        | [+18.32]              | [-13.92]               | [+4.96]                   | [-0.78]                 | [+44.46]             |
|             | $\Delta E^{\text{FPA}} = \Delta E(\text{V}) + \Delta E(\text{core}) + \Delta E(\text{ZPVE}) = 44.46 + 0.65 + 3.49 = 48.62 \text{ kcal mol}^{-1}$ ;              |                       |                        |                           |                         |                      |
|             | $\Delta H_f^{0K}(\text{C}_8\text{H}_2) = 216.6 \pm 4.0 \text{ kcal mol}^{-1}$ ; $\Delta H_f^{298K}(\text{C}_8\text{H}_2) = 219.4 \pm 4.0 \text{ kcal mol}^{-1}$ |                       |                        |                           |                         |                      |
| Fit         | $a + be^{-cX}$                                                                                                                                                  | $a + bX^{-3}$         | $a + bX^{-3}$          | $a + bX^{-3}$             | additive                |                      |
| Points (X=) | 3,4,5                                                                                                                                                           | 4,5                   | 3,4                    | 3,4                       |                         |                      |

<sup>a</sup> The symbol  $\delta$  denotes the increment in the energy difference ( $\Delta E$ ) with respect to the previous level of theory. Bracketed numbers are the result of basis set extrapolations (using the fits denoted in the table), while unbracketed numbers were explicitly computed. All energies evaluated at frozen-core CCSD(T)/TZ(2d1f,2p1d) optimized geometries.

<sup>b</sup> Reference enthalpies of formation (kcal mol<sup>-1</sup>, from Gurvich, L. V.; Veyts, I. V.; Alcock, C. B. *Thermodynamic Properties of Individual Substances*; Fourth ed.; Hemisphere Pub. Co.: New York, 1989.) were as follows:  $\Delta H_f^{0K}(\text{methane}) = -15.92$ ;  $\Delta H_f^{298K}(\text{methane}) = -17.83$ ;  $\Delta H_f^{0K}(\text{ethane}) = -16.34$ ;  $\Delta H_f^{298K}(\text{ethane}) = -20.08$ .

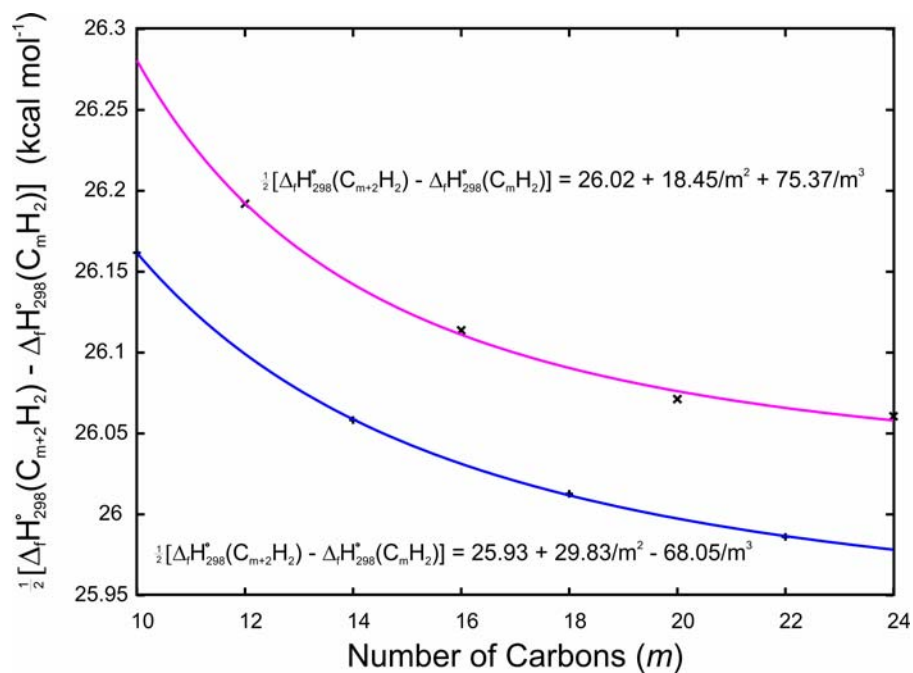

**Figure S1.** Extrapolation of differences in polyene enthalpies of formation.

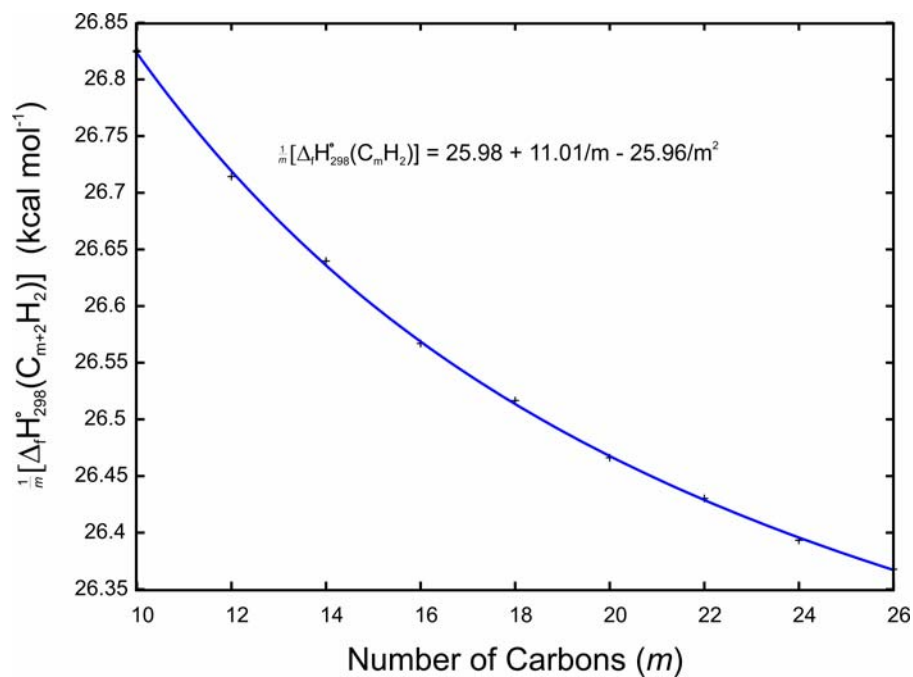

**Figure S2.** Extrapolation of polyene enthalpies of formation.

**Table S28.** Collection A of absolute energies (hartree). All energies computed at B3LYP/6-31G(d) optimized geometries.

|           |                    | <b>B3LYP</b>    | <b>B3LYP</b> | <b>M05-2X</b>   | <b>M06</b>      | <b>M06-2X</b>   | <b>HF</b>      | <b>HF</b>      | <b>HF</b>      |
|-----------|--------------------|-----------------|--------------|-----------------|-----------------|-----------------|----------------|----------------|----------------|
|           | <b>Molecule</b>    | <b>6-31G(d)</b> | <b>ZPVE</b>  | <b>6-31G(d)</b> | <b>6-31G(d)</b> | <b>6-31G(d)</b> | <b>cc-pVDZ</b> | <b>cc-pVTZ</b> | <b>cc-pVQZ</b> |
| <b>1</b>  | 1,3-cyclohexadiene | -233.418936     | 77.08        | -233.382209     | -233.223872     | -233.301303     | -231.850073    | -231.909103    | -231.923566    |
| <b>2</b>  | 1,3-hexadiene      | -234.625745     | 89.53        | -234.575626     | -234.419731     | -234.493673     | -233.013322    | -233.076169    | -233.090950    |
| <b>3</b>  | 1,3-hexadiyne      | -232.123700     | 60.13        | -232.082098     | -231.934348     | -232.009904     | -230.594759    | -230.657041    | -230.671111    |
| <b>5</b>  | 1,4-hexadiene      | -234.617288     | 89.26        | -234.568744     | -234.411866     | -234.486827     | -233.007549    | -233.070476    | -233.085312    |
| <b>6</b>  | 1,4-hexadiyne      | -232.109379     | 59.08        | -232.071561     | -231.922129     | -231.999471     | -230.590541    | -230.653189    | -230.667611    |
| <b>7</b>  | 2-butene           | -157.226916     | 68.11        | -157.187872     | -157.084994     | -157.132046     | -156.123479    | -156.167000    | -156.177045    |
| <b>8</b>  | 2-pentene          | -196.540443     | 86.21        | -196.494129     | -196.364874     | -196.424251     | -195.160610    | -195.214436    | -195.226870    |
| <b>9</b>  | 2-pentyne          | -195.292535     | 71.42        | -195.250893     | -195.126026     | -195.186290     | -193.957835    | -194.011510    | -194.023770    |
| <b>10</b> | hexa-1-ene-3-yne   | -233.374159     | 74.69        | -233.328479     | -233.176428     | -233.251670     | -231.805426    | -231.867958    | -231.882442    |
| <b>11</b> | hexa-1-ene-4-yne   | -233.367630     | 74.33        | -233.323893     | -233.170979     | -233.246623     | -231.802943    | -231.865730    | -231.880379    |
| <b>12</b> | hexa-1-yne-3-ene   | -233.368181     | 74.26        | -233.324242     | -233.171105     | -233.247348     | -231.800755    | -231.863363    | -231.877857    |
| <b>13</b> | hexa-1-yne-4-ene   | -233.361386     | 74.00        | -233.318981     | -233.165195     | -233.242277     | -231.797811    | -231.860683    | -231.875326    |
| <b>14</b> | propane            | -119.144248     | 65.34        | -119.108383     | -119.032201     | -119.064425     | -118.272401    | -118.307186    | -118.314807    |
| <b>15</b> | propene            | -117.907562     | 50.26        | -117.876690     | -117.799110     | -117.834699     | -117.082199    | -117.115839    | -117.123510    |
| <b>16</b> | propyne            | -116.653270     | 34.96        | -116.628888     | -116.554193     | -116.591749     | -115.874005    | -115.907501    | -115.914972    |
| <b>17</b> | ethane             | -79.830418      | 47.21        | -79.801700      | -79.751724      | -79.771828      | -79.234876     | -79.259434     | -79.264650     |
| <b>18</b> | 1,3-butadiene      | -155.992138     | 53.64        | -155.957812     | -155.852940     | -155.903477     | -154.934300    | -154.976885    | -154.986885    |
| <b>19</b> | 1,3-butadiyne      | -153.481644     | 23.91        | -153.457196     | -153.359891     | -153.412945     | -152.507875    | -152.549829    | -152.559149    |
| <b>20</b> | allene             | -116.657673     | 34.81        | -116.630792     | -116.554548     | -116.591860     | -115.872306    | -115.905027    | -115.912501    |
| <b>21</b> | butatriene         | -154.730753     | 38.04        | -154.696919     | -154.598058     | -154.647292     | -153.703637    | -153.745466    | -153.755123    |
| <b>22</b> | ethene             | -78.587458      | 32.15        | -78.565005      | -78.512563      | -78.536852      | -78.039978     | -78.063548     | -78.068817     |
| <b>23</b> | vinylacetylene     | -154.733801     | 38.39        | -154.705405     | -154.603457     | -154.656091     | -153.720680    | -153.762960    | -153.772660    |
| <b>24</b> | methane            | -40.518383      | 28.37        | -40.497902      | -40.473999      | -40.482027      | -40.198694     | -40.213133     | -40.215933     |
| <b>25</b> | butane             | -158.458056     | 83.36        | -158.415148     | -158.312880     | -158.357204     | -157.309876    | -157.354806    | -157.364833    |
| <b>26</b> | acetylene          | -77.325646      | 16.71        | -77.311050      | -77.260069      | -77.287767      | -76.825632     | -76.849016     | -76.854017     |
| <b>29</b> | pentane            | -197.771782     | 59.93        | -197.721597     | -197.593871     | -197.650245     | -196.347254    | -196.402347    | -196.414780    |
| <b>30</b> | 2-butyne           | -155.978959     | 44.23        | -155.944904     | -155.846292     | -155.894076     | -154.920590    | -154.963920    | -154.973780    |
| <b>31</b> | 1-butyne           | -155.966883     | 101.37       | -155.935014     | -155.833629     | -155.883732     | -154.911244    | -154.955110    | -154.964991    |
| <b>32</b> | 1-butene           | -157.221067     | 53.09        | -157.183062     | -157.078896     | -157.126944     | -156.119294    | -156.163249    | -156.173316    |
| <b>33</b> | 1-pentene          | -196.534980     | 53.30        | -196.489845     | -196.359706     | -196.419763     | -195.156798    | -195.210946    | -195.223422    |
| <b>34</b> | 1-pentyne          | -195.281016     | 68.41        | -195.241999     | -195.114934     | -195.177069     | -193.948924    | -194.002992    | -194.015281    |
| <b>35</b> | 1,3-pentadiene     | -195.312252     | 86.40        | -195.269434     | -195.140009     | -195.201715     | -193.976214    | -194.028737    | -194.041126    |
| <b>36</b> | 1,3-pentadiyne     | -192.810039     | 71.24        | -192.775944     | -192.654811     | -192.717825     | -191.557413    | -191.609315    | -191.620983    |
| <b>37</b> | 1,4-pentadiene     | -195.297771     | 71.42        | -195.257726     | -195.125526     | -195.189459     | -193.966041    | -194.019075    | -194.031532    |
| <b>38</b> | 1,4-pentadiyne     | -192.782878     | 41.84        | -192.754753     | -192.629142     | -192.696512     | -191.543007    | -191.595740    | -191.607750    |
| <b>39</b> | penta-1-ene-3-yne  | -194.060617     | 71.47        | -194.022410     | -193.896927     | -193.959644     | -192.768179    | -192.820353    | -192.832437    |



|    |                      |             |        |             |             |             |             |             |             |
|----|----------------------|-------------|--------|-------------|-------------|-------------|-------------|-------------|-------------|
| 40 | penta-1-ene-4-yne    | -194.041694 | 40.99  | -194.007717 | -193.878619 | -193.944456 | -192.756053 | -192.808984 | -192.821235 |
| 41 | penta-1-yne-3-ene    | -194.054687 | 56.50  | -194.017989 | -193.891270 | -193.955086 | -192.763658 | -192.815923 | -192.828021 |
| 42 | 2,4-hexadiene        | -234.632033 | 56.22  | -234.580936 | -234.426279 | -234.499175 | -233.017752 | -233.080139 | -233.094892 |
| 43 | 2,4-hexadiyne        | -232.137552 | 56.16  | -232.093999 | -231.948585 | -232.021907 | -230.606081 | -230.667804 | -230.681805 |
| 44 | hexa-2-ene-4-yne     | -233.381051 | 89.16  | -233.334700 | -233.183977 | -233.257950 | -231.810700 | -231.872788 | -231.887238 |
| 45 | 1,2,3-hexatriene     | -233.364347 | 59.92  | -233.314868 | -233.164212 | -233.237315 | -231.783139 | -231.845390 | -231.859845 |
| 46 | 1,2,3-pentatriene    | -194.050585 | 74.21  | -194.008442 | -193.884006 | -193.944898 | -192.745816 | -192.797741 | -192.809798 |
| 47 | E-2,3,4-hexatriene   | -233.369905 | 74.27  | -233.319357 | -233.169678 | -233.242316 | -231.787452 | -231.849393 | -231.863824 |
| 48 | Z-2,3,4-hexatriene   | -233.369901 | 56.14  | -233.319348 | -233.169515 | -233.241974 | -231.787448 | -231.849376 | -231.863803 |
| 49 | 1,5-hexadiene        | -234.611790 | 74.10  | -234.564637 | -234.406324 | -234.482374 | -233.003575 | -233.066927 | -233.081826 |
| 50 | 1,5-hexadiyne        | -232.103102 | 74.10  | -232.068033 | -231.915730 | -231.995715 | -230.586736 | -230.649804 | -230.664274 |
| 51 | Hexa-1-ene-5-yne     | -233.357551 | 89.42  | -233.316414 | -233.161285 | -233.239341 | -231.795365 | -231.858588 | -231.873282 |
| 52 | cyclopentadiene      | -194.101058 | 59.20  | -194.072055 | -193.939319 | -194.004633 | -192.808199 | -192.857189 | -192.869287 |
| 53 | 2-ethyl-1-butene     | -235.851868 | 74.29  | -235.800893 | -235.645789 | -235.717232 | -234.194792 | -234.259019 | -234.273851 |
| 54 | 2-methyl-1-pentene   | -235.853309 | 58.29  | -235.801864 | -235.647564 | -235.718790 | -234.196685 | -234.260846 | -234.275717 |
| 55 | 2-methyl-2-pentene   | -235.856908 | 104.42 | -235.804078 | -235.649566 | -235.720494 | -234.198050 | -234.262025 | -234.276851 |
| 56 | 2-methylpentane      | -237.084759 | 104.27 | -237.029426 | -236.876091 | -236.944281 | -235.383066 | -235.448276 | -235.463100 |
| 57 | 3-methylpentane      | -237.083253 | 103.98 | -237.028391 | -236.875354 | -236.943410 | -235.381009 | -235.446144 | -235.460960 |
| 58 | E-3-methyl-2-pentene | -235.855791 | 119.12 | -235.803298 | -235.649279 | -235.719857 | -234.196536 | -234.260423 | -234.275226 |
| 59 | Z-3-methyl-2-pentene | -235.855600 | 119.18 | -235.803222 | -235.649427 | -235.720201 | -234.196486 | -234.260371 | -234.275178 |
| 60 | 2-methylpropene      | -157.227288 | 103.99 | -157.189382 | -157.086461 | -157.133461 | -156.123860 | -156.167727 | -156.177822 |
| 61 | 2-methyl-1-butene    | -196.539764 | 104.04 | -196.495573 | -196.366597 | -196.425884 | -195.159573 | -195.213609 | -195.226072 |
| 62 | 2-methyl-2-butene    | -196.543587 | 68.09  | -196.497801 | -196.369941 | -196.428287 | -195.161122 | -195.214804 | -195.227241 |
| 63 | Isobutene            | -158.458808 | 86.29  | -158.417263 | -158.315056 | -158.359253 | -157.310346 | -157.355306 | -157.365329 |
| 64 | Isopentane           | -197.771116 | 85.91  | -197.723104 | -197.595082 | -197.651244 | -196.345847 | -196.400899 | -196.413317 |
| 65 | H <sub>2</sub>       | -1.175482   | 83.03  | -1.163691   | -1.166962   | -1.163690   | -1.128727   | -1.132940   | -1.133437   |
|    | H                    | -0.500273   | 101.08 | -0.497906   | -0.497919   | -0.496666   | -0.499278   | -0.499810   | -0.499946   |
|    | C                    | -37.846280  | 6.37   | -37.842055  | -37.814695  | -37.828932  | -37.682418  | -37.686708  | -37.688298  |

**Table S29.** Collection B of absolute energies (hartree). All energies computed at B3LYP/6-31G(d) optimized geometries.

|    | Molecule           | HF          | HF          | MP2         | MP2         | MP2         | MP2         | MP2         | CCSD        |
|----|--------------------|-------------|-------------|-------------|-------------|-------------|-------------|-------------|-------------|
|    |                    | cc-pV5Z     | CBS limit   | cc-pVDZ     | cc-pVTZ     | cc-pVQZ     | cc-pV5Z     | CBS limit   | cc-pVDZ     |
| 1  | 1,3-cyclohexadiene | -231.927048 | -231.928152 | -232.654670 | -232.886253 | -232.960965 | -232.987284 | -233.012349 | -232.713640 |
| 2  | 1,3-hexadiene      | -233.094514 | -233.095646 | -233.835261 | -234.076388 | -234.152549 | -234.179230 | -234.204617 | -233.906251 |
| 3  | 1,3-hexadiyne      | -230.674297 | -230.675230 | -231.378453 | -231.606852 | -231.679090 | -231.704312 | -231.728365 | -231.420442 |
| 5  | 1,4-hexadiene      | -233.088887 | -233.090021 | -233.828267 | -234.069447 | -234.145663 | -234.172340 | -234.197714 | -233.900443 |
| 6  | 1,4-hexadiyne      | -230.670864 | -230.671810 | -231.367964 | -231.595740 | -231.668737 | -231.694108 | -231.718261 | -231.413976 |
| 7  | 2-butene           | -156.179505 | -156.180303 | -156.684616 | -156.851418 | -156.903352 | -156.921479 | -156.938713 | -156.739334 |
| 8  | 2-pentene          | -195.229897 | -195.230871 | -195.865310 | -196.073315 | -196.138152 | -196.160800 | -196.182360 | -195.932570 |
| 9  | 2-pentyne          | -194.026664 | -194.027559 | -194.639694 | -194.840937 | -194.904198 | -194.926169 | -194.947079 | -194.693807 |
| 10 | hexa-1-ene-3-yne   | -231.885848 | -231.886895 | -232.605567 | -232.839991 | -232.914306 | -232.940230 | -232.964904 | -232.663343 |
| 11 | hexa-1-ene-4-yne   | -231.883813 | -231.884864 | -232.600971 | -232.835371 | -232.910019 | -232.936011 | -232.960731 | -232.660144 |
| 12 | hexa-1-yne-3-ene   | -231.881217 | -231.882232 | -232.602274 | -232.836658 | -232.911069 | -232.937081 | -232.961860 | -232.660114 |
| 13 | hexa-1-yne-4-ene   | -231.878720 | -231.879743 | -232.597298 | -232.831904 | -232.906550 | -232.932619 | -232.957433 | -232.656508 |
| 14 | propane            | -118.316720 | -118.317361 | -118.717911 | -118.851421 | -118.891861 | -118.905967 | -118.919400 | -118.767900 |
| 15 | propene            | -117.125423 | -117.126058 | -117.499938 | -117.625567 | -117.664530 | -117.678172 | -117.691113 | -117.542424 |
| 16 | propyne            | -115.916702 | -115.917224 | -116.270947 | -116.389861 | -116.427247 | -116.440281 | -116.452663 | -116.300246 |
| 17 | ethane             | -79.265982  | -79.266439  | -79.537313  | -79.629642  | -79.657100  | -79.666666  | -79.675763  | -79.574424  |
| 18 | 1,3-butadiene      | -154.989321 | -154.990105 | -155.469000 | -155.627643 | -155.677915 | -155.695584 | -155.712351 | -155.515579 |
| 19 | 1,3-butadiyne      | -152.561151 | -152.561698 | -153.006546 | -153.152075 | -153.198689 | -153.214965 | -153.230489 | -153.024331 |
| 20 | allene             | -115.914277 | -115.914831 | -116.264154 | -116.382395 | -116.419684 | -116.432658 | -116.444960 | -116.298935 |
| 21 | butatriene         | -153.757359 | -153.758033 | -154.217174 | -154.369058 | -154.417507 | -154.434305 | -154.450257 | -154.254509 |
| 22 | ethene             | -78.070152  | -78.070606  | -78.314878  | -78.399128  | -78.425061  | -78.434176  | -78.442791  | -78.345106  |
| 23 | vinylacetylene     | -153.774889 | -153.775555 | -154.235447 | -154.387329 | -154.435836 | -154.452819 | -154.468963 | -154.268805 |
| 24 | methane            | -40.216670  | -40.216934  | -40.360076  | -40.411505  | -40.426092  | -40.431096  | -40.435836  | -40.383627  |
| 25 | butane             | -157.367322 | -157.368144 | -157.898644 | -158.073336 | -158.126763 | -158.145396 | -158.163155 | -157.961468 |
| 26 | acetylene          | -76.855135  | -76.855456  | -77.081441  | -77.159080  | -77.183404  | -77.191990  | -77.200147  | -77.098481  |
| 29 | pentane            | -196.417845 | -196.418848 | -197.079325 | -197.295223 | -197.361629 | -197.384786 | -197.406869 | -197.154983 |
| 30 | 2-butyne           | -154.976101 | -154.976815 | -155.459284 | -155.619210 | -155.669580 | -155.687126 | -155.703814 | -155.500801 |
| 31 | 1-butyne           | -154.967294 | -154.967994 | -155.451176 | -155.611429 | -155.661729 | -155.679304 | -155.696027 | -155.493104 |
| 32 | 1-butene           | -156.175798 | -156.176610 | -156.680471 | -156.847319 | -156.899197 | -156.917500 | -156.934912 | -156.735537 |
| 33 | 1-pentene          | -195.226478 | -195.227470 | -195.861349 | -196.069427 | -196.134289 | -196.156977 | -196.178566 | -195.929171 |
| 34 | 1-pentyne          | -194.018159 | -194.019039 | -194.632161 | -194.833685 | -194.896976 | -194.919058 | -194.940087 | -194.686808 |
| 35 | 1,3-pentadiene     | -194.044120 | -194.045075 | -194.654499 | -194.854409 | -194.917667 | -194.939827 | -194.960890 | -194.713015 |
| 36 | 1,3-pentadiyne     | -191.623590 | -191.624341 | -192.197863 | -192.384901 | -192.444261 | -192.464951 | -192.484672 | -192.227364 |
| 37 | 1,4-pentadiene     | -194.034553 | -194.035519 | -194.643246 | -194.843242 | -194.906490 | -194.928682 | -194.949763 | -194.703252 |
| 38 | 1,4-pentadiyne     | -191.610398 | -191.611147 | -192.178681 | -192.365380 | -192.425386 | -192.446326 | -192.466268 | -192.212526 |
| 39 | penta-1-ene-3-yne  | -192.835267 | -192.836132 | -193.425115 | -193.618190 | -193.679612 | -193.701014 | -193.721364 | -193.470336 |
| 40 | penta-1-ene-4-yne  | -192.824070 | -192.824923 | -193.412160 | -193.605547 | -193.667209 | -193.688783 | -193.709297 | -193.459180 |

|    |                      |             |             |             |             |             |             |             |             |
|----|----------------------|-------------|-------------|-------------|-------------|-------------|-------------|-------------|-------------|
| 41 | penta-1-yne-3-ene    | -192.830810 | -192.831646 | -193.421608 | -193.614737 | -193.676242 | -193.697726 | -193.718176 | -193.466953 |
| 42 | 2,4-hexadiene        | -233.098428 | -233.099543 | -233.839787 | -234.080895 | -234.157112 | -234.183746 | -234.209095 | -233.910259 |
| 43 | 2,4-hexadiyne        | -230.685003 | -230.685949 | -231.388529 | -231.616835 | -231.688953 | -231.714068 | -231.738011 | -231.429810 |
| 44 | hexa-2-ene-4-yne     | -231.890614 | -231.891643 | -232.610993 | -232.845264 | -232.919627 | -232.945515 | -232.970163 | -232.668215 |
| 45 | 1,2,3-hexatriene     | -231.863235 | -231.864274 | -232.584013 | -232.818576 | -232.892874 | -232.918731 | -232.943342 | -232.645226 |
| 46 | 1,2,3-pentatriene    | -192.812614 | -192.813472 | -193.402923 | -193.596271 | -193.657657 | -193.678984 | -193.699265 | -193.451783 |
| 47 | E-2,3,4-hexatriene   | -231.867206 | -231.868241 | -232.588344 | -232.823074 | -232.897357 | -232.923193 | -232.947785 | -232.648792 |
| 48 | Z-2,3,4-hexatriene   | -231.867183 | -231.868216 | -232.588370 | -232.823074 | -232.897352 | -232.923194 | -232.947795 | -232.648813 |
| 49 | 1,5-hexadiene        | -233.085437 | -233.086592 | -233.823998 | -234.065437 | -234.141711 | -234.168446 | -234.193863 | -233.896794 |
| 50 | 1,5-hexadiyne        | -230.667517 | -230.668453 | -231.364702 | -231.592999 | -231.666061 | -231.691561 | -231.715849 | -231.411106 |
| 51 | Hexa-1-ene-5-yne     | -231.876708 | -231.877750 | -232.594496 | -232.829358 | -232.904044 | -232.930161 | -232.955010 | -232.654115 |
| 52 | cyclopentadiene      | -192.872211 | -192.873143 | -193.472370 | -193.662991 | -193.724915 | -193.746804 | -193.767633 | -193.516424 |
| 53 | 2-ethyl-1-butene     | -234.277430 | -234.278568 | -235.046278 | -235.296227 | -235.374069 | -235.401236 | -235.427122 | -235.125421 |
| 54 | 2-methyl-1-pentene   | -234.279307 | -234.280449 | -235.047012 | -235.296830 | -235.374792 | -235.401982 | -235.427886 | -235.126603 |
| 55 | 2-methyl-2-pentene   | -234.280429 | -234.281567 | -235.049155 | -235.298958 | -235.376843 | -235.404011 | -235.429899 | -235.127914 |
| 56 | 2-methylpentane      | -235.466722 | -235.467894 | -236.261799 | -236.519135 | -236.598544 | -236.626196 | -236.652579 | -236.349351 |
| 57 | 3-methylpentane      | -235.464581 | -235.465751 | -236.260644 | -236.518194 | -236.597587 | -236.625247 | -236.651639 | -236.348014 |
| 58 | E-3-methyl-2-pentene | -234.278796 | -234.279931 | -235.048423 | -235.298331 | -235.376183 | -235.403338 | -235.429218 | -235.127054 |
| 59 | Z-3-methyl-2-pentene | -234.278752 | -234.279889 | -235.048453 | -235.298419 | -235.376248 | -235.403387 | -235.429249 | -235.127072 |
| 60 | 2-methylpropene      | -156.180288 | -156.181085 | -156.686290 | -156.853513 | -156.905543 | -156.923703 | -156.940966 | -156.740566 |
| 61 | 2-methyl-1-butene    | -195.229091 | -195.230056 | -195.866414 | -196.075083 | -196.140072 | -196.162743 | -196.184326 | -195.933203 |
| 62 | 2-methyl-2-butene    | -195.230252 | -195.231213 | -195.868363 | -196.076995 | -196.141985 | -196.164638 | -196.186207 | -195.934651 |
| 63 | Isobutene            | -157.367806 | -157.368619 | -157.901279 | -158.076072 | -158.129562 | -158.148173 | -158.165915 | -157.963406 |
| 64 | Isopentane           | -196.416366 | -196.417358 | -197.081064 | -197.297224 | -197.363668 | -197.386804 | -197.408871 | -197.155823 |
| 65 | H <sub>2</sub>       | -1.133586   | -1.133649   | -1.155124   | -1.164627   | -1.166558   | -1.167247   | -1.167878   | -1.163450   |
|    | H                    | -0.499995   | -0.500022   |             |             |             |             |             |             |
|    | C                    | -37.688643  | -37.688738  | -37.736491  | -37.756467  | -37.763406  | -37.765903  | -37.768256  | -37.759365  |

**Table S30.** Collection C of absolute energies (hartree). All energies computed at B3LYP/6-31G(d) optimized geometries.

|    |                    | CCSD        | CCSD(T)     | CCSD(T)     | MP2(fc)     | MP2(all)   | Focal Point                | G3          | CBS-QB3     |
|----|--------------------|-------------|-------------|-------------|-------------|------------|----------------------------|-------------|-------------|
|    | Molecule           | cc-pVTZ     | cc-pVDZ     | cc-pVTZ     | cc-pCVTZ    | cc-pCVTZ   | $E_{\text{FPA}}$ (No ZPVE) |             |             |
| 1  | 1,3-cyclohexadiene | -232.929610 | -232.746817 | -232.978802 | -232.893942 | -233.17931 | -233.390271                | -233.324554 | -232.940235 |
| 2  | 1,3-hexadiene      | -234.131236 | -233.938145 | -234.179013 | -234.083923 | -234.36919 | -234.592508                | -234.528175 | -234.122568 |
| 3  | 1,3-hexadiyne      | -231.634048 | -231.455499 | -231.685101 | -231.614980 | -231.90051 | -232.092150                | -232.028596 | -231.671828 |
| 5  | 1,4-hexadiene      | -234.125537 | -233.931729 | -234.172712 | -234.077044 | -234.36230 | -234.586238                | -234.521961 | -234.116544 |
| 6  | 1,4-hexadiyne      | -231.627038 | -231.447323 | -231.676204 | -231.604487 | -231.89000 | -232.084241                | -232.020266 | -231.664703 |
| 7  | 2-butene           | -156.895108 | -156.758863 | -156.925398 | -156.856363 | -157.04658 | -157.202909                | -157.160161 | -156.875739 |
| 8  | 2-pentene          | -196.126873 | -195.957321 | -196.164838 | -196.079435 | -196.31720 | -196.511645                | -196.458128 | -196.101009 |
| 9  | 2-pentyne          | -194.882062 | -194.719523 | -194.920901 | -194.847731 | -195.08565 | -195.264967                | -195.211911 | -194.879267 |
| 10 | hexa-1-ene-3-yne   | -232.882286 | -232.696307 | -232.931096 | -232.848077 | -233.13348 | -233.341410                | -233.277725 | -232.896622 |
| 11 | hexa-1-ene-4-yne   | -232.879157 | -232.692366 | -232.927184 | -232.843634 | -233.12905 | -233.337965                | -233.274078 | -232.893477 |
| 12 | hexa-1-yne-3-ene   | -232.879092 | -232.693216 | -232.928110 | -232.844648 | -233.12999 | -233.338660                | -233.274472 | -232.893726 |
| 13 | hexa-1-yne-4-ene   | -232.875709 | -232.688908 | -232.923998 | -232.839997 | -233.12535 | -233.334879                | -233.270583 | -232.890115 |
| 14 | propane            | -118.892822 | -118.781126 | -118.913918 | -118.854863 | -118.99750 | -119.124538                | -119.092627 | -118.855864 |
| 15 | propene            | -117.659720 | -117.557131 | -117.682322 | -117.629315 | -117.77191 | -117.890461                | -117.858489 | -117.646210 |
| 16 | propyne            | -116.411546 | -116.316119 | -116.435324 | -116.394136 | -116.53683 | -116.640820                | -116.609017 | -116.421736 |
| 17 | ethane             | -79.660835  | -79.582749  | -79.674369  | -79.631913  | -79.72700  | -79.815578                 | -79.794610  | -79.630569  |
| 18 | 1,3-butadiene      | -155.663431 | -155.537374 | -155.695787 | -155.632798 | -155.82288 | -155.970577                | -155.927780 | -155.666948 |
| 19 | 1,3-butadiyne      | -153.160423 | -153.049415 | -153.196287 | -153.157959 | -153.34823 | -153.464968                | -153.422768 | -153.211127 |
| 20 | allene             | -116.409193 | -116.315222 | -116.433404 | -116.386539 | -116.52917 | -116.638600                | -116.607337 | -116.420359 |
| 21 | butatriene         | -154.395926 | -154.279010 | -154.431117 | -154.374706 | -154.56492 | -154.702525                | -154.661152 | -154.426033 |
| 22 | ethene             | -78.423690  | -78.354893  | -78.438695  | -78.401681  | -78.496642 | -78.577319                 | -78.556320  | -78.416640  |
| 23 | vinylacetylene     | -154.410590 | -154.291831 | -154.444226 | -154.392962 | -154.58312 | -154.716014                | -154.673509 | -154.437507 |
| 24 | methane            | -40.431742  | -40.387351  | -40.438052  | -40.412622  | -40.46019  | -40.509953                 | -40.500284  | -40.410005  |
| 25 | butane             | -158.124884 | -157.979646 | -158.153601 | -158.077955 | -158.26816 | -158.433621                | -158.390869 | -158.081525 |
| 26 | acetylene          | -77.171144  | -77.109592  | -77.187594  | -77.162013  | -77.25699  | -77.323640                 | -77.302255  | -77.187430  |
| 29 | pentane            | -197.356914 | -197.178132 | -197.393268 | -197.301015 | -197.53877 | -197.742672                | -197.689092 | -197.307210 |
| 30 | 2-butyne           | -155.650451 | -155.521502 | -155.681634 | -155.624858 | -155.81525 | -155.956627                | -155.914230 | -155.654745 |
| 31 | 1-butyne           | -155.643039 | -155.513961 | -155.674437 | -155.616861 | -155.80709 | -155.949266                | -155.906552 | -155.646166 |
| 32 | 1-butene           | -156.891375 | -156.755238 | -156.921625 | -156.852239 | -157.04238 | -157.199356                | -157.156310 | -156.871268 |
| 33 | 1-pentene          | -196.123563 | -195.953851 | -196.161464 | -196.075520 | -196.31322 | -196.508301                | -196.454717 | -196.097107 |
| 34 | 1-pentyne          | -194.875352 | -194.712621 | -194.914390 | -194.840288 | -195.07808 | -195.258586                | -195.204985 | -194.872182 |
| 35 | 1,3-pentadiene     | -194.899452 | -194.739871 | -194.939536 | -194.860759 | -195.09848 | -195.283739                | -195.230155 | -194.897249 |
| 36 | 1,3-pentadiyne     | -192.402317 | -192.257380 | -192.445691 | -192.391891 | -192.62989 | -192.783463                | -192.730733 | -192.446920 |
| 37 | 1,4-pentadiene     | -194.889853 | -194.729478 | -194.929303 | -194.849635 | -195.08727 | -195.273455                | -195.219921 | -194.886574 |
| 38 | 1,4-pentadiyne     | -192.387159 | -192.241001 | -192.428877 | -192.372764 | -192.61058 | -192.767581                | -192.714032 | -192.430672 |
| 39 | penta-1-ene-3-yne  | -193.650646 | -193.498275 | -193.691788 | -193.625125 | -193.86299 | -194.032827                | -193.979913 | -193.671417 |
| 40 | penta-1-ene-4-yne  | -193.639842 | -193.486527 | -193.680418 | -193.612444 | -193.85017 | -194.021891                | -193.968360 | -193.659936 |

|    |                      |             |             |             |             |            |             |             |             |
|----|----------------------|-------------|-------------|-------------|-------------|------------|-------------|-------------|-------------|
| 41 | penta-1-yne-3-ene    | -193.647342 | -193.495025 | -193.688676 | -193.621558 | -193.85936 | -194.029917 | -193.976501 | -193.668493 |
| 42 | 2,4-hexadiene        | -234.135204 | -233.942189 | -234.183035 | -234.088445 | -234.37380 | -234.596591 | -234.532245 | -234.127371 |
| 43 | 2,4-hexadiyne        | -231.643374 | -231.464751 | -231.694248 | -231.625003 | -231.91072 | -232.101142 | -232.037891 | -231.681980 |
| 44 | hexa-2-ene-4-yne     | -232.887071 | -232.701213 | -232.935926 | -232.853381 | -233.13889 | -233.346332 | -233.282564 | -232.902307 |
| 45 | 1,2,3-hexatriene     | -232.863945 | -232.679904 | -232.914628 | -232.826557 | -233.11194 | -233.324774 | -233.261800 | -232.881353 |
| 46 | 1,2,3-pentatriene    | -193.631956 | -193.481403 | -193.674928 | -193.603086 | -193.84092 | -194.015755 | -193.963560 | -193.655895 |
| 47 | E-2,3,4-hexatriene   | -232.867622 | -232.683542 | -232.918394 | -232.831047 | -233.11650 | -233.328554 | -233.265535 | -232.885574 |
| 48 | Z-2,3,4-hexatriene   | -232.867621 | -232.683570 | -232.918399 | -232.831056 | -233.11650 | -233.328569 | -233.265536 | -232.885544 |
| 49 | 1,5-hexadiene        | -234.122139 | -233.927992 | -234.169241 | -234.073003 | -234.35819 | -234.582859 | -234.518476 | -234.112627 |
| 50 | 1,5-hexadiyne        | -231.624710 | -231.444570 | -231.674090 | -231.601571 | -231.88695 | -232.082321 | -232.017916 | -231.661598 |
| 51 | Hexa-1-ene-5-yne     | -232.873588 | -232.686443 | -232.921823 | -232.837434 | -233.12272 | -233.332761 | -233.268366 | -232.887297 |
| 52 | cyclopentadiene      | -193.694066 | -193.544905 | -193.735977 | -193.669475 | -193.90730 | -194.078447 | -194.022818 | -193.712750 |
| 53 | 2-ethyl-1-butene     | -235.358784 | -235.155608 | -235.404955 | -235.303511 | -235.58885 | -235.821190 | -235.757124 | -235.327120 |
| 54 | 2-methyl-1-pentene   | -235.359865 | -235.156621 | -235.405842 | -235.304125 | -235.58948 | -235.822256 | -235.758010 | -235.328276 |
| 55 | 2-methyl-2-pentene   | -235.361150 | -235.158102 | -235.407300 | -235.306303 | -235.59169 | -235.823629 | -235.759510 | -235.330447 |
| 56 | 2-methylpentane      | -236.589897 | -236.377916 | -236.634386 | -236.526122 | -236.81146 | -237.053170 | -236.989298 | -236.535123 |
| 57 | 3-methylpentane      | -236.588736 | -236.376693 | -236.633392 | -236.525177 | -236.81052 | -237.052177 | -236.988361 | -236.534121 |
| 58 | E-3-methyl-2-pentene | -235.360370 | -235.157345 | -235.406657 | -235.305675 | -235.59106 | -235.822932 | -235.758885 | -235.329824 |
| 59 | Z-3-methyl-2-pentene | -235.360411 | -235.157366 | -235.406712 | -235.305749 | -235.59113 | -235.822926 | -235.759106 | -235.329814 |
| 60 | 2-methylpropene      | -156.896668 | -156.760478 | -156.927159 | -156.858479 | -157.04871 | -157.204841 | -157.162185 | -156.877856 |
| 61 | 2-methyl-1-butene    | -196.128004 | -195.958215 | -196.166310 | -196.081206 | -196.31900 | -196.513352 | -196.459891 | -196.102705 |
| 62 | 2-methyl-2-butene    | -196.129402 | -195.959771 | -196.167829 | -196.083169 | -196.32101 | -196.514885 | -196.461415 | -196.105099 |
| 63 | Isobutene            | -158.126830 | -157.981869 | -158.155845 | -158.080716 | -158.27094 | -158.435911 | -158.393483 | -158.084603 |
| 64 | Isopentane           | -197.357886 | -197.179377 | -197.394703 | -197.303039 | -197.54082 | -197.744133 | -197.691005 | -197.309468 |
| 65 | H <sub>2</sub>       | -1.172337   | -1.163450   | -1.172337   | -1.164627   | -1.16463   | -1.175588   | -1.176829   | -1.166082   |
|    | H                    |             |             |             |             | -0.49981   | -0.500022   | -0.498642   | -0.499818   |
|    | C                    | -37.778559  | -37.760340  | -37.780695  | -37.757799  | -37.80415  | -37.838975  | -37.825356  | -37.785377  |

**Table S31.** Polyynes absolute energies (hartree). All energies computed at B3LYP/6-31G(d) optimized geometries.

| <b>Molecule</b>                | <b>B3LYP</b> | <b>M05-2X</b> | <b>M06-2X</b> | <b>M06</b>  |
|--------------------------------|--------------|---------------|---------------|-------------|
| C <sub>6</sub> H <sub>2</sub>  | -229.640061  | -229.604597   | -229.539274   | -229.461376 |
| C <sub>8</sub> H <sub>2</sub>  | -305.799631  | -305.752236   | -305.665917   | -305.563400 |
| C <sub>10</sub> H <sub>2</sub> | -381.959661  | -381.899953   | -381.792635   | -381.665746 |
| C <sub>12</sub> H <sub>2</sub> | -458.119921  | -458.048131   | -457.919709   | -457.768577 |
| C <sub>14</sub> H <sub>2</sub> | -534.280297  | -534.195878   | -534.046433   | -533.871149 |
| C <sub>16</sub> H <sub>2</sub> | -610.440737  | -610.343935   | -610.173377   | -609.974007 |
| C <sub>18</sub> H <sub>2</sub> | -686.601212  | -686.491464   | -686.299864   | -686.076562 |
| C <sub>20</sub> H <sub>2</sub> | -762.761708  | -762.639442   | -762.426724   | -762.179405 |
| C <sub>22</sub> H <sub>2</sub> | -838.922215  | -838.787035   | -838.553276   | -838.282008 |
| C <sub>24</sub> H <sub>2</sub> | -915.082728  | -914.935178   | -914.680314   | -914.384912 |
| C <sub>26</sub> H <sub>2</sub> | -991.243246  | -991.082715   | -990.806805   | -990.487503 |

## Cartesian Coordinates

### B3LYP/6-31G(d) Optimized Structures

#### 1,3-cyclohexadiene (1)

|   |            |            |            |
|---|------------|------------|------------|
| C | 1.2602580  | 0.7262900  | 0.1038860  |
| C | 1.2603170  | -0.7261910 | -0.1038850 |
| C | 0.1138130  | -1.4250640 | -0.0643900 |
| C | -1.1953550 | -0.7319220 | 0.2392260  |
| C | -1.1954150 | 0.7318290  | -0.2392230 |
| C | 0.1137000  | 1.4250740  | 0.0643820  |
| H | 2.2110390  | 1.2273920  | 0.2715840  |
| H | 2.2111390  | -1.2272220 | -0.2715670 |
| H | 0.1161000  | -2.5063380 | -0.1842240 |
| H | -2.0367100 | -1.2722020 | -0.2104630 |
| H | -1.3622490 | -0.7637420 | 1.3297120  |
| H | -1.3623160 | 0.7636340  | -1.3297070 |
| H | -2.0368120 | 1.2720410  | 0.2104700  |
| H | 0.1159020  | 2.5063470  | 0.1842250  |

#### 1,3-hexadiene (2)

|   |            |            |            |
|---|------------|------------|------------|
| C | -3.1325550 | -0.1646500 | 0.2681550  |
| C | -1.9605260 | 0.4048360  | -0.0491400 |
| C | -0.6830920 | -0.2933920 | -0.0791350 |
| C | 0.4880470  | 0.2821480  | -0.3984960 |
| C | 1.8198740  | -0.4116370 | -0.4273890 |
| C | 2.8346260  | 0.2019020  | 0.5540900  |
| H | -4.0596300 | 0.4004960  | 0.2763660  |
| H | -3.2012390 | -1.2181590 | 0.5307830  |
| H | -1.9361480 | 1.4644900  | -0.3065460 |
| H | -0.7023360 | -1.3542930 | 0.1766280  |
| H | 0.4968410  | 1.3454860  | -0.6490760 |
| H | 1.6860750  | -1.4779660 | -0.2052740 |
| H | 2.2380140  | -0.3549420 | -1.4441110 |
| H | 3.8045360  | -0.3032130 | 0.4818890  |
| H | 2.9950450  | 1.2660860  | 0.3435160  |
| H | 2.4805990  | 0.1167740  | 1.5873190  |

#### 1,3-hexadiyne (3)

|   |            |            |            |
|---|------------|------------|------------|
| C | -3.3466050 | 0.2463760  | 0.0000700  |
| C | -2.1500690 | 0.0457610  | -0.0000400 |
| C | -0.8006310 | -0.1805240 | -0.0001340 |
| C | 0.3978910  | -0.3857900 | -0.0000360 |
| C | 1.8417070  | -0.6076240 | 0.0000650  |
| C | 2.6557540  | 0.7014170  | 0.0000040  |
| H | -4.3980130 | 0.4221300  | 0.0001930  |
| H | 2.1130620  | -1.2106430 | 0.8777780  |
| H | 2.1131760  | -1.2107960 | -0.8775070 |
| H | 3.7277440  | 0.4773600  | 0.0000900  |
| H | 2.4279310  | 1.3020480  | -0.8858530 |
| H | 2.4278160  | 1.3022050  | 0.8857250  |

#### 1,4-hexadiene (5)

|   |            |            |            |
|---|------------|------------|------------|
| C | -2.9909600 | -0.4286970 | -0.1142690 |
| C | -1.8255530 | -0.1307320 | 0.4607770  |
| C | -0.7574520 | 0.7487770  | -0.1456800 |
| C | 0.5392260  | 0.0061290  | -0.3673430 |
| C | 1.7063090  | 0.3102230  | 0.2063680  |
| C | 2.9957530  | -0.4304130 | -0.0062490 |
| H | -3.7199170 | -1.0746670 | 0.3679700  |
| H | -3.2634420 | -0.0332420 | -1.0911530 |
| H | -1.5861810 | -0.5524580 | 1.4378720  |
| H | -1.1277430 | 1.1519380  | -1.0993470 |
| H | -0.5690610 | 1.6091810  | 0.5126550  |
| H | 0.4838760  | -0.8503530 | -1.0418350 |
| H | 1.7497940  | 1.1648040  | 0.8850560  |
| H | 2.8664070  | -1.2732650 | -0.6936780 |
| H | 3.7711030  | 0.2288740  | -0.4198850 |
| H | 3.3912230  | -0.8225310 | 0.9407160  |

#### 1,4-hexadiyne (6)

|   |            |            |            |
|---|------------|------------|------------|
| C | -2.8141380 | -0.9007520 | 0.0000050  |
| C | -1.9546220 | -0.0543980 | -0.0000040 |
| C | -0.9199930 | 0.9902930  | 0.0000050  |
| C | 0.4519920  | 0.4628200  | -0.0000110 |
| C | 1.5820290  | 0.0355050  | -0.0000030 |
| C | 2.9458150  | -0.4880880 | 0.0000070  |
| H | -3.5658160 | -1.6569210 | -0.0000080 |
| H | -1.0653300 | 1.6401330  | 0.8758540  |
| H | -1.0653380 | 1.6401460  | -0.8758340 |
| H | 2.9475340  | -1.5848010 | -0.0001930 |
| H | 3.5012760  | -0.1552700 | -0.8852080 |
| H | 3.5011730  | -0.1555710 | 0.8853950  |

#### 2-butene (7)

|   |            |            |            |
|---|------------|------------|------------|
| C | 1.9635030  | 0.0792220  | 0.0001310  |
| C | 0.5381140  | -0.3953330 | -0.0002090 |
| C | -0.5381160 | 0.3953540  | -0.0002160 |
| C | -1.9634920 | -0.0792390 | 0.0001280  |
| H | 2.5074790  | -0.2886270 | 0.8809840  |
| H | 2.5081760  | -0.2895990 | -0.8798660 |
| H | 2.0228530  | 1.1731430  | -0.0004560 |
| H | 0.3924600  | -1.4777080 | -0.0001820 |
| H | -0.3925090 | 1.4777470  | -0.0001420 |
| H | -2.0227660 | -1.1731560 | -0.0015650 |
| H | -2.5072640 | 0.2876580  | 0.8815070  |
| H | -2.5084870 | 0.2905190  | -0.8792920 |

## 2-pentene (8)

|   |            |            |            |
|---|------------|------------|------------|
| C | -2.3403300 | -0.4626960 | 0.2712860  |
| C | -1.3021940 | 0.5617090  | -0.2178340 |
| C | 0.0653560  | -0.0372130 | -0.4088150 |
| C | 1.1718420  | 0.3365440  | 0.2392340  |
| C | 2.5342550  | -0.2691560 | 0.0542550  |
| H | -3.3315020 | -0.0049260 | 0.3688450  |
| H | -2.4277940 | -1.3022270 | -0.4291370 |
| H | -2.0557970 | -0.8728880 | 1.2466540  |
| H | -1.2424140 | 1.3969320  | 0.4918920  |
| H | -1.6517060 | 0.9879620  | -1.1704850 |
| H | 0.1307930  | -0.8527190 | -1.1337580 |
| H | 1.1033190  | 1.1491160  | 0.9657980  |
| H | 2.5189910  | -1.0737410 | -0.6889640 |
| H | 3.2645810  | 0.4824870  | -0.2756150 |
| H | 2.9179560  | -0.6851300 | 0.9960100  |

## 2-pentyne (9)

|   |            |            |            |
|---|------------|------------|------------|
| C | 2.6538890  | 0.2270990  | 0.0005910  |
| C | 1.2257510  | -0.0831520 | -0.0011500 |
| C | 0.0449580  | -0.3466880 | -0.0008790 |
| C | -1.3910800 | -0.6386280 | 0.0005240  |
| C | -2.2661360 | 0.6290790  | 0.0000320  |
| H | 2.8318590  | 1.2915090  | -0.1968620 |
| H | 3.1139800  | -0.0102030 | 0.9678720  |
| H | 3.1885490  | -0.3444400 | -0.7682470 |
| H | -1.6410160 | -1.2535470 | -0.8754060 |
| H | -1.6394050 | -1.2517810 | 0.8781650  |
| H | -3.3284330 | 0.3606350  | 0.0014670  |
| H | -2.0639300 | 1.2417230  | 0.8844140  |
| H | -2.0658890 | 1.2398380  | -0.8861070 |

## hexalene-3-yne (10)

|   |            |            |            |
|---|------------|------------|------------|
| C | 3.1190670  | -0.2625630 | 0.1034600  |
| C | 2.0503950  | 0.5311100  | -0.0655960 |
| C | 0.6973320  | 0.0877550  | -0.0611880 |
| C | -0.4673770 | -0.2538820 | -0.0669800 |
| C | -1.8724120 | -0.6625220 | -0.0662790 |
| C | -2.8485050 | 0.5163110  | 0.1056290  |
| H | 4.1246610  | 0.1464780  | 0.0873950  |
| H | 3.0180710  | -1.3323180 | 0.2604200  |
| H | 2.2040790  | 1.5996780  | -0.2200330 |
| H | -2.0972910 | -1.1902070 | -1.0041840 |
| H | -2.0369930 | -1.3956260 | 0.7359080  |
| H | -3.8833850 | 0.1571440  | 0.0991430  |
| H | -2.6697340 | 1.0356570  | 1.0524380  |
| H | -2.7304150 | 1.2419380  | -0.7053630 |

## hexalene-4-yne (11)

|   |            |            |            |
|---|------------|------------|------------|
| C | -2.8394310 | -0.5889790 | 0.2929030  |
| C | -1.7825610 | -0.2121030 | -0.4244600 |
| C | -0.8211780 | 0.8874010  | -0.0231290 |
| C | 0.5751560  | 0.4354890  | 0.0154380  |
| C | 1.7196150  | 0.0447350  | 0.0330080  |
| C | 3.1031250  | -0.4245420 | 0.0625020  |
| H | -3.5069100 | -1.3769300 | -0.0453470 |
| H | -3.0795480 | -0.1248380 | 1.2475060  |
| H | -1.5628720 | -0.7040910 | -1.3713960 |
| H | -0.9071530 | 1.7216160  | -0.7373770 |
| H | -1.1150240 | 1.2923440  | 0.9546480  |
| H | 3.1554470  | -1.5162480 | -0.0314320 |
| H | 3.6908920  | 0.0067290  | -0.7572110 |
| H | 3.5968160  | -0.1505880 | 1.0030320  |

## hexa-1-yne-3-ene (12)

|   |            |            |            |
|---|------------|------------|------------|
| C | 3.2230130  | -0.3686990 | -0.0061580 |
| C | 2.0801110  | 0.0215970  | -0.0971880 |
| C | 0.7503300  | 0.5115000  | -0.2324010 |
| C | -0.3176000 | -0.0053280 | 0.4001790  |
| C | -1.7232900 | 0.5003760  | 0.2549020  |
| C | -2.6868470 | -0.5703980 | -0.2878190 |
| H | 4.2235550  | -0.7243390 | 0.0874920  |
| H | 0.6143740  | 1.3653620  | -0.8974820 |
| H | -0.1722300 | -0.8607960 | 1.0602370  |
| H | -2.0882920 | 0.8365730  | 1.2371750  |
| H | -1.7342210 | 1.3802310  | -0.4006110 |
| H | -3.7084770 | -0.1794270 | -0.3503250 |
| H | -2.3842700 | -0.8988930 | -1.2879740 |
| H | -2.7047430 | -1.4530040 | 0.3623940  |

## hexa-1-yne-4-ene (13)

|   |            |            |            |
|---|------------|------------|------------|
| C | 2.9521510  | -0.7403200 | -0.1421140 |
| C | 2.0047720  | 0.0017440  | -0.0424760 |
| C | 0.8444120  | 0.8907910  | 0.0900910  |
| C | -0.4345370 | 0.1455790  | 0.4102120  |
| C | -1.5487530 | 0.2131520  | -0.3202720 |
| C | -2.8302180 | -0.5062370 | -0.0109030 |
| H | 3.7869070  | -1.3970550 | -0.2341750 |
| H | 1.0539500  | 1.6248210  | 0.8838690  |
| H | 0.7141050  | 1.4696540  | -0.8339590 |
| H | -0.4078200 | -0.4772950 | 1.3044630  |
| H | -1.5513320 | 0.8340690  | -1.2184360 |
| H | -2.7453620 | -1.1060780 | 0.9013580  |
| H | -3.6609570 | 0.1998520  | 0.1224510  |
| H | -3.1164570 | -1.1762290 | -0.8327980 |



| propane (14) |            |            |            |
|--------------|------------|------------|------------|
| C            | 0.0000000  | 1.2775210  | -0.2599370 |
| C            | 0.0000000  | -1.2775210 | -0.2599370 |
| C            | 0.0000000  | 0.0000000  | 0.5862770  |
| H            | 0.0000000  | 2.1757500  | 0.3684760  |
| H            | 0.0000000  | -2.1757500 | 0.3684760  |
| H            | -0.8847390 | 1.3229590  | -0.9072490 |
| H            | 0.8847390  | 1.3229590  | -0.9072490 |
| H            | 0.8847390  | -1.3229590 | -0.9072490 |
| H            | -0.8847390 | -1.3229590 | -0.9072490 |
| H            | -0.8777430 | 0.0000000  | 1.2468100  |
| H            | 0.8777430  | 0.0000000  | 1.2468100  |

| propene (15) |            |            |            |
|--------------|------------|------------|------------|
| C            | 1.2933320  | 0.1504100  | 0.0000000  |
| C            | 0.0000000  | 0.4744930  | 0.0000000  |
| C            | -1.1391340 | -0.5044980 | 0.0000000  |
| H            | 2.0737110  | 0.9068500  | 0.0000000  |
| H            | 1.6223610  | -0.8871920 | 0.0000000  |
| H            | -0.2788420 | 1.5294860  | 0.0000000  |
| H            | -0.7800120 | -1.5391840 | 0.0000000  |
| H            | -1.7812050 | -0.3661940 | 0.8804630  |
| H            | -1.7812050 | -0.3661940 | -0.8804630 |

| propyne (16) |            |            |            |
|--------------|------------|------------|------------|
| C            | 0.0000000  | 0.0000000  | 0.2189320  |
| C            | 0.0000000  | 0.0000000  | 1.4260340  |
| C            | 0.0000000  | 0.0000000  | -1.2413640 |
| H            | 0.0000000  | 1.0223780  | -1.6379110 |
| H            | -0.8854060 | -0.5111890 | -1.6379110 |
| H            | 0.8854060  | -0.5111890 | -1.6379110 |
| H            | 0.0000000  | 0.0000000  | 2.4921200  |

| ethane (17) |            |            |            |
|-------------|------------|------------|------------|
| C           | 0.0000000  | 0.7654190  | 0.0000000  |
| C           | 0.0000000  | -0.7654190 | 0.0000000  |
| H           | -0.5106150 | 1.1641590  | 0.8842520  |
| H           | 0.5106150  | -1.1641590 | -0.8842520 |
| H           | -0.5106150 | 1.1641590  | -0.8842520 |
| H           | 0.5106150  | -1.1641590 | 0.8842520  |
| H           | 1.0210400  | 1.1642630  | 0.0000000  |
| H           | -1.0210400 | -1.1642630 | 0.0000000  |

| 1,3-butadiene (18) |            |            |           |
|--------------------|------------|------------|-----------|
| C                  | 0.6016940  | 1.7516380  | 0.0000000 |
| C                  | 0.6016940  | 0.4109560  | 0.0000000 |
| H                  | -0.3254550 | 2.3208860  | 0.0000000 |
| H                  | 1.5241810  | 2.3243690  | 0.0000000 |
| H                  | 1.5517350  | -0.1243970 | 0.0000000 |
| C                  | -0.6016940 | -0.4109560 | 0.0000000 |
| C                  | -0.6016940 | -1.7516380 | 0.0000000 |
| H                  | -1.5517350 | 0.1243970  | 0.0000000 |
| H                  | -1.5241810 | -2.3243690 | 0.0000000 |
| H                  | 0.3254550  | -2.3208860 | 0.0000000 |

| 1,3-butadiyne (19) |           |           |            |
|--------------------|-----------|-----------|------------|
| H                  | 0.0000000 | 0.0000000 | 2.9630080  |
| C                  | 0.0000000 | 0.0000000 | 1.8966890  |
| C                  | 0.0000000 | 0.0000000 | 0.6843940  |
| C                  | 0.0000000 | 0.0000000 | -0.6843940 |
| C                  | 0.0000000 | 0.0000000 | -1.8966890 |
| H                  | 0.0000000 | 0.0000000 | -2.9630080 |

| allene (20) |            |            |            |
|-------------|------------|------------|------------|
| C           | 0.0000000  | 0.0000000  | 1.3071140  |
| C           | 0.0000000  | 0.0000000  | 0.0000000  |
| C           | 0.0000000  | 0.0000000  | -1.3071140 |
| H           | -0.9273170 | 0.0000000  | -1.8768140 |
| H           | 0.9273170  | 0.0000000  | -1.8768140 |
| H           | 0.0000000  | 0.9273170  | 1.8768140  |
| H           | 0.0000000  | -0.9273170 | 1.8768140  |

| butatriene (21) |           |            |            |
|-----------------|-----------|------------|------------|
| C               | 0.0000000 | 0.0000000  | 0.6355080  |
| C               | 0.0000000 | 0.0000000  | -0.6355080 |
| C               | 0.0000000 | 0.0000000  | 1.9531260  |
| C               | 0.0000000 | 0.0000000  | -1.9531260 |
| H               | 0.0000000 | 0.9265290  | -2.5242220 |
| H               | 0.0000000 | -0.9265290 | -2.5242220 |
| H               | 0.0000000 | 0.9265290  | 2.5242220  |
| H               | 0.0000000 | -0.9265290 | 2.5242220  |

| ethene (22) |           |            |            |
|-------------|-----------|------------|------------|
| C           | 0.0000000 | 0.0000000  | 0.6654520  |
| C           | 0.0000000 | 0.0000000  | -0.6654520 |
| H           | 0.0000000 | 0.9236000  | -1.2395730 |
| H           | 0.0000000 | -0.9236000 | -1.2395730 |
| H           | 0.0000000 | -0.9236000 | 1.2395730  |
| H           | 0.0000000 | 0.9236000  | 1.2395730  |

## vinylacetylene (23)

|   |            |            |           |
|---|------------|------------|-----------|
| C | -0.4529000 | 1.8667200  | 0.0000000 |
| C | 0.0000000  | 0.7439130  | 0.0000000 |
| H | -0.8689870 | 2.8483760  | 0.0000000 |
| C | 0.5793790  | -0.5574440 | 0.0000000 |
| H | 1.6685300  | -0.5967850 | 0.0000000 |
| C | -0.1220030 | -1.7005320 | 0.0000000 |
| H | 0.3813940  | -2.6624010 | 0.0000000 |
| H | -1.2077950 | -1.7051310 | 0.0000000 |

## methane (24)

|   |            |            |            |
|---|------------|------------|------------|
| C | 0.0000000  | 0.0000450  | 0.0000000  |
| H | -1.0462850 | 0.3173120  | 0.0000000  |
| H | 0.0494960  | -1.0922230 | 0.0000000  |
| H | 0.4983950  | 0.3873210  | 0.8927360  |
| H | 0.4983950  | 0.3873210  | -0.8927360 |

## butane (25)

|   |            |            |            |
|---|------------|------------|------------|
| C | -0.4215840 | 0.6409070  | 0.0000000  |
| C | 0.4215840  | -0.6409070 | 0.0000000  |
| C | 0.4215840  | 1.9202470  | 0.0000000  |
| C | -0.4215840 | -1.9202470 | 0.0000000  |
| H | -1.0832740 | 0.6374700  | 0.8781320  |
| H | -1.0832740 | 0.6374700  | -0.8781320 |
| H | 1.0832740  | -0.6374700 | 0.8781320  |
| H | 1.0832740  | -0.6374700 | -0.8781320 |
| H | 0.2093690  | -2.8165600 | 0.0000000  |
| H | -0.2093690 | 2.8165600  | 0.0000000  |
| H | -1.0685810 | -1.9683430 | -0.8847400 |
| H | -1.0685810 | -1.9683430 | 0.8847400  |
| H | 1.0685810  | 1.9683430  | -0.8847400 |
| H | 1.0685810  | 1.9683430  | 0.8847400  |

## acetylene (26)

|   |           |           |            |
|---|-----------|-----------|------------|
| H | 0.0000000 | 0.0000000 | 1.6693820  |
| C | 0.0000000 | 0.0000000 | 0.6025580  |
| C | 0.0000000 | 0.0000000 | -0.6025580 |
| H | 0.0000000 | 0.0000000 | -1.6693820 |

## hexadiene (27)

|   |            |            |           |
|---|------------|------------|-----------|
| C | -0.1698920 | 3.0086620  | 0.0000000 |
| C | 0.1698920  | -3.0086620 | 0.0000000 |
| C | 0.6282330  | 1.9278200  | 0.0000000 |
| C | -0.6282330 | -1.9278200 | 0.0000000 |
| C | 0.1698920  | 0.5847080  | 0.0000000 |
| C | -0.1698920 | -0.5847080 | 0.0000000 |
| H | -1.2521650 | 2.9204310  | 0.0000000 |
| H | 1.2521650  | -2.9204310 | 0.0000000 |
| H | 0.2497010  | 4.0098890  | 0.0000000 |
| H | -0.2497010 | -4.0098890 | 0.0000000 |
| H | 1.7097150  | 2.0666130  | 0.0000000 |
| H | -1.7097150 | -2.0666130 | 0.0000000 |

## hexadiyne (28)

|   |            |            |           |
|---|------------|------------|-----------|
| C | 0.5058830  | 3.0217880  | 0.0000000 |
| C | -0.5058830 | -3.0217880 | 0.0000000 |
| C | 0.5058830  | 1.8102860  | 0.0000000 |
| C | -0.5058830 | -1.8102860 | 0.0000000 |
| C | 0.5509210  | 0.3935590  | 0.0000000 |
| C | -0.5509210 | -0.3935590 | 0.0000000 |
| H | 0.4949640  | 4.0880730  | 0.0000000 |
| H | -0.4949640 | -4.0880730 | 0.0000000 |
| H | 1.5357080  | -0.0703780 | 0.0000000 |
| H | -1.5357080 | 0.0703780  | 0.0000000 |

## pentane (29)

|   |            |            |            |
|---|------------|------------|------------|
| C | 0.0000000  | 1.2838390  | -0.5232230 |
| C | 0.0000000  | -1.2838390 | -0.5232230 |
| C | 0.0000000  | 0.0000000  | 0.3165430  |
| C | 0.0000000  | 2.5607530  | 0.3238470  |
| C | 0.0000000  | -2.5607530 | 0.3238470  |
| H | 0.8781440  | 1.2834790  | -1.1847360 |
| H | -0.8781440 | 1.2834790  | -1.1847360 |
| H | 0.8781440  | -1.2834790 | -1.1847360 |
| H | -0.8781440 | -1.2834790 | -1.1847360 |
| H | 0.8785650  | 0.0000000  | 0.9793410  |
| H | -0.8785650 | 0.0000000  | 0.9793410  |
| H | 0.0000000  | -3.4585730 | -0.3050300 |
| H | 0.0000000  | 3.4585730  | -0.3050300 |
| H | -0.8847320 | -2.6071820 | 0.9708950  |
| H | 0.8847320  | -2.6071820 | 0.9708950  |
| H | -0.8847320 | 2.6071820  | 0.9708950  |
| H | 0.8847320  | 2.6071820  | 0.9708950  |

## 2-butyne (30)

|   |            |            |            |
|---|------------|------------|------------|
| C | 2.0659480  | 0.0000200  | 0.0000090  |
| C | 0.6045930  | 0.0001990  | 0.0000710  |
| H | 2.4664550  | -0.9672740 | -0.3281000 |
| H | 2.4666390  | 0.1994680  | 1.0016990  |
| H | 2.4665860  | 0.7677490  | -0.6736570 |
| H | -2.4661480 | 0.9675060  | 0.3282290  |
| C | -0.6045920 | -0.0004390 | -0.0001530 |
| H | -2.4667290 | -0.7675750 | 0.6736640  |
| C | -2.0659520 | 0.0001140  | 0.0000360  |
| H | -2.4667830 | -0.1992330 | -1.0016160 |

|                       |            |            |            |                            |            |            |            |
|-----------------------|------------|------------|------------|----------------------------|------------|------------|------------|
| <b>1-butyne (31)</b>  |            |            |            | H                          | -0.7332020 | -1.1584160 | -0.8787240 |
| C                     | -1.3354630 | -1.4669780 | 0.0000000  | H                          | -0.7329370 | -1.1589050 | 0.8779240  |
| C                     | -0.7390580 | -0.4166850 | 0.0000000  | H                          | -3.0652910 | -0.8432520 | 0.0000350  |
| H                     | -1.8616040 | -2.3941990 | 0.0000000  | H                          | -2.5546490 | 0.6021480  | 0.8856290  |
| C                     | 0.0000000  | 0.8474770  | 0.0000000  | H                          | -2.5549420 | 0.6026690  | -0.8848190 |
| C                     | 1.5277240  | 0.6529000  | 0.0000000  |                            |            |            |            |
| H                     | -0.2953480 | 1.4393260  | 0.8771740  | <b>1,3-pentadiene (35)</b> |            |            |            |
| H                     | -0.2953480 | 1.4393260  | -0.8771740 | C                          | -1.3605810 | 0.3955840  | 0.0000660  |
| H                     | 2.0341500  | 1.6241200  | 0.0000000  | H                          | -1.3621610 | 1.4863510  | -0.0000030 |
| H                     | 1.8494660  | 0.0955720  | -0.8853320 | C                          | -2.5304130 | -0.2602080 | 0.0000260  |
| H                     | 1.8494660  | 0.0955720  | 0.8853320  | H                          | -3.4806570 | 0.2650880  | -0.0001120 |
|                       |            |            |            | H                          | -2.5741030 | -1.3472530 | -0.0000810 |
| <b>1-butene (32)</b>  |            |            |            | C                          | -0.0530300 | -0.2448440 | -0.0000340 |
| C                     | -1.8618690 | 0.0180780  | -0.2792180 | H                          | -0.0449470 | -1.3362060 | -0.0000180 |
| H                     | -0.6720780 | -1.2243730 | 0.9136020  | C                          | 1.1145400  | 0.4192990  | -0.0000710 |
| C                     | -0.7234730 | -0.2963630 | 0.3399780  | H                          | 1.0929500  | 1.5106240  | -0.0000440 |
| H                     | -2.7407430 | -0.6190220 | -0.2241690 | C                          | 2.4718260  | -0.2171430 | 0.0000330  |
| C                     | 0.5401930  | 0.5204510  | 0.3082500  | H                          | 3.0552030  | 0.0878260  | -0.8798710 |
| C                     | 1.7294290  | -0.2462660 | -0.2946650 | H                          | 3.0550500  | 0.0876880  | 0.8801050  |
| H                     | 0.3661690  | 1.4444330  | -0.2577630 | H                          | 2.4046130  | -1.3102450 | -0.0000940 |
| H                     | 0.8003900  | 0.8255570  | 1.3330220  |                            |            |            |            |
| H                     | 2.6410310  | 0.3616710  | -0.2733530 | <b>1,3-pentadiyne (36)</b> |            |            |            |
| H                     | 1.9301560  | -1.1687840 | 0.2636210  | C                          | 0.0000000  | 0.0000000  | 1.5205070  |
| H                     | 1.5289120  | -0.5247390 | -1.3351760 | C                          | 0.0000000  | 0.0000000  | 2.7336780  |
| H                     | -1.9595150 | 0.9298570  | -0.8658550 | H                          | 0.0000000  | 0.0000000  | 3.7996930  |
|                       |            |            |            | C                          | 0.0000000  | 0.0000000  | 0.1524010  |
| <b>1-pentene (33)</b> |            |            |            | C                          | 0.0000000  | 0.0000000  | -1.0628540 |
| C                     | -2.4849490 | -0.2165920 | -0.3042250 | C                          | 0.0000000  | 0.0000000  | -2.5194050 |
| C                     | -1.4194630 | 0.3413530  | 0.2718000  | H                          | 0.0000000  | 1.0231360  | -2.9152200 |
| C                     | -0.0744200 | -0.3127730 | 0.4336200  | H                          | 0.8860620  | -0.5115680 | -2.9152200 |
| C                     | 1.0572400  | 0.4486630  | -0.2830580 | H                          | -0.8860620 | -0.5115680 | -2.9152200 |
| C                     | 2.4314140  | -0.1965640 | -0.0793040 |                            |            |            |            |
| H                     | -0.1176620 | -1.3449710 | 0.0608080  | <b>1,4-pentadiene (37)</b> |            |            |            |
| H                     | 0.1736540  | -0.3775490 | 1.5048460  | C                          | -0.0000260 | 0.6639300  | -0.0008750 |
| H                     | -1.4991330 | 1.3609400  | 0.6547390  | H                          | 0.3136240  | 1.3168250  | -0.8279110 |
| H                     | -3.4300380 | 0.3119480  | -0.3979180 | H                          | -0.3137910 | 1.3190190  | 0.8244160  |
| H                     | -2.4537720 | -1.2291430 | -0.7025650 | C                          | 1.1766960  | -0.1779190 | 0.4335050  |
| H                     | 0.8260780  | 0.5039780  | -1.3549180 | H                          | 0.9928620  | -0.8381740 | 1.2819160  |
| H                     | 1.0804750  | 1.4861850  | 0.0787870  | C                          | 2.3760660  | -0.1759370 | -0.1486830 |
| H                     | 3.2161570  | 0.3632160  | -0.6006680 | H                          | 2.5967350  | 0.4640360  | -1.0011170 |
| H                     | 2.6985410  | -0.2339860 | 0.9840990  | H                          | 3.1855890  | -0.8089960 | 0.2049180  |
| H                     | 2.4467580  | -1.2251350 | -0.4602090 | C                          | -1.1766470 | -0.1792090 | -0.4329690 |
|                       |            |            |            | H                          | -0.9925780 | -0.8422290 | -1.2791690 |
| <b>1-pentyne (34)</b> |            |            |            | C                          | -2.3760960 | -0.1754890 | 0.1490380  |
| C                     | 2.6470330  | -0.2416250 | 0.0003560  | H                          | -2.5969280 | 0.4670750  | 0.9994780  |
| C                     | 1.5076070  | 0.1589610  | -0.0004620 | H                          | -3.1854710 | -0.8098160 | -0.2026260 |
| C                     | 0.1202400  | 0.6247610  | -0.0000240 |                            |            |            |            |
| C                     | -0.9089710 | -0.5258120 | -0.0001970 |                            |            |            |            |
| C                     | -2.3510650 | -0.0126000 | 0.0001940  |                            |            |            |            |
| H                     | -0.0507080 | 1.2647820  | -0.8774890 |                            |            |            |            |
| H                     | -0.0501890 | 1.2641380  | 0.8780080  |                            |            |            |            |
| H                     | 3.6528540  | -0.5952730 | 0.0002360  |                            |            |            |            |

## 1,4-pentadiyne (38)

|   |            |            |            |
|---|------------|------------|------------|
| C | 0.0000000  | 1.2299970  | 0.0726910  |
| C | 0.0000000  | 2.2470300  | -0.5753130 |
| H | 0.0000000  | 3.1419950  | -1.1550340 |
| C | 0.0000000  | 0.0000000  | 0.8764870  |
| H | 0.8762800  | 0.0000000  | 1.5413050  |
| H | -0.8762800 | 0.0000000  | 1.5413050  |
| C | 0.0000000  | -1.2299970 | 0.0726910  |
| C | 0.0000000  | -2.2470300 | -0.5753130 |
| H | 0.0000000  | -3.1419950 | -1.1550340 |

## penta-1-ene-3-yne (39)

|   |            |            |            |
|---|------------|------------|------------|
| C | 1.2712350  | 0.8807090  | 0.0000000  |
| H | 1.2580610  | 1.9711660  | 0.0000000  |
| C | 2.4520430  | 0.2432870  | 0.0000000  |
| H | 3.3851280  | 0.7984460  | 0.0000000  |
| H | 2.5160950  | -0.8407530 | 0.0000000  |
| C | 0.0000000  | 0.2391920  | 0.0000000  |
| C | -1.1038960 | -0.2639620 | 0.0000000  |
| C | -2.4219350 | -0.8898450 | 0.0000000  |
| H | -2.5616530 | -1.5234760 | 0.8848630  |
| H | -3.2206650 | -0.1381930 | 0.0000000  |
| H | -2.5616530 | -1.5234760 | -0.8848630 |

## penta-1-ene-4-yne (40)

|   |            |            |            |
|---|------------|------------|------------|
| C | -0.0374580 | 0.7744880  | 0.0941420  |
| H | -0.1065810 | 1.5279270  | 0.8942620  |
| H | 0.2016480  | 1.3247260  | -0.8254620 |
| C | 1.0810980  | -0.1959320 | 0.4129200  |
| H | 0.9261920  | -0.8185240 | 1.2931250  |
| C | 2.1989080  | -0.3136160 | -0.3010170 |
| H | 2.3770920  | 0.2871810  | -1.1906430 |
| H | 2.9804930  | -1.0156600 | -0.0239380 |
| C | -1.3405150 | 0.1146680  | -0.0435800 |
| C | -2.4070530 | -0.4417960 | -0.1466160 |
| H | -3.3487270 | -0.9325160 | -0.2424410 |

## penta-1-yne-3-ene (41)

|   |            |            |            |
|---|------------|------------|------------|
| C | -0.0927460 | 0.4793060  | -0.0003470 |
| H | 0.1222550  | 1.5486510  | -0.0001720 |
| C | 0.9271980  | -0.3964670 | -0.0003960 |
| H | 0.7006610  | -1.4619650 | 0.0000460  |
| C | -1.4676280 | 0.1109010  | 0.0004230  |
| C | -2.6469410 | -0.1648570 | 0.0000480  |
| H | -3.6806030 | -0.4254620 | -0.0004080 |
| C | 2.3750670  | -0.0120190 | 0.0001610  |
| H | 2.8909670  | -0.4176560 | 0.8811690  |
| H | 2.8922930  | -0.4199430 | -0.8789540 |
| H | 2.5047290  | 1.0751940  | -0.0010180 |

## 2,4-hexadiene (42)

|   |            |            |            |
|---|------------|------------|------------|
| C | 3.1901850  | 0.1400900  | 0.0001190  |
| H | 3.7596360  | -0.1895560 | 0.8804520  |
| H | 3.7601680  | -0.1903150 | -0.8795880 |
| H | 3.1729840  | 1.2353200  | -0.0003660 |
| C | 1.8045230  | -0.4330960 | -0.0000190 |
| H | 1.7325690  | -1.5222620 | 0.0000650  |
| C | 0.6692390  | 0.2852900  | -0.0001600 |
| H | 0.7332360  | 1.3751060  | -0.0002230 |
| C | -0.6692410 | -0.2853170 | -0.0001580 |
| H | -0.7332320 | -1.3751340 | -0.0002160 |
| C | -1.8045110 | 0.4331130  | -0.0000070 |
| H | -1.7325110 | 1.5222750  | 0.0000810  |
| C | -3.1901980 | -0.1400800 | 0.0001200  |
| H | -3.7599810 | 0.1899340  | -0.8798650 |
| H | -3.1729960 | -1.2353100 | 0.0001230  |
| H | -3.7598600 | 0.1899350  | 0.8801680  |

## 2,4-hexadiyne (43)

|   |            |            |            |
|---|------------|------------|------------|
| C | 0.0000000  | 0.0000000  | 0.6840090  |
| C | 0.0000000  | 0.0000000  | 1.8998700  |
| C | 0.0000000  | 0.0000000  | 3.3570240  |
| H | -0.5109570 | 0.8859220  | 3.7547810  |
| H | -0.5117520 | -0.8854630 | 3.7547810  |
| H | 1.0227090  | -0.0004590 | 3.7547810  |
| C | 0.0000000  | 0.0000000  | -0.6840090 |
| C | 0.0000000  | 0.0000000  | -1.8998700 |
| C | 0.0000000  | 0.0000000  | -3.3570240 |
| H | 0.5117520  | -0.8854630 | -3.7547810 |
| H | -1.0227090 | -0.0004590 | -3.7547810 |
| H | 0.5109570  | 0.8859220  | -3.7547810 |

## hexa-2-ene-4-yne (44)

|   |            |            |            |
|---|------------|------------|------------|
| C | 0.7161490  | 0.5278040  | 0.0003960  |
| H | 1.0004430  | 1.5815860  | 0.0008380  |
| C | 1.6845880  | -0.4052490 | 0.0004210  |
| H | 1.3976580  | -1.4562260 | 0.0003560  |
| C | 3.1526630  | -0.1040970 | -0.0001200 |
| H | 3.6481650  | -0.5390690 | 0.8787560  |
| H | 3.6462150  | -0.5368070 | -0.8813900 |
| H | 3.3430930  | 0.9743690  | 0.0006430  |
| C | -0.6794820 | 0.2493020  | -0.0002250 |
| C | -1.8773230 | 0.0556830  | -0.0008270 |
| C | -3.3149360 | -0.1953110 | 0.0002000  |
| H | -3.8826320 | 0.7398290  | -0.0799490 |
| H | -3.6100270 | -0.8350700 | -0.8411470 |
| H | -3.6328700 | -0.6974040 | 0.9228300  |

## 1,2,3-hexatriene (45)

|   |            |            |            |
|---|------------|------------|------------|
| C | 0.7300080  | 0.3666350  | -0.0354490 |
| C | 1.9487300  | 0.0068310  | -0.0447990 |
| C | -0.5379990 | 0.7353090  | -0.0211050 |
| C | 3.2137740  | -0.3647000 | -0.0550970 |
| H | 3.5406740  | -1.2918830 | 0.4116950  |
| H | -0.8184650 | 1.6729410  | -0.5069810 |
| C | -1.6632350 | -0.0519550 | 0.6053770  |
| H | -2.1309410 | 0.5632110  | 1.3885600  |
| H | -1.2575830 | -0.9416820 | 1.0984260  |
| H | 3.9829250  | 0.2405830  | -0.5309870 |
| C | -2.7379330 | -0.4543990 | -0.4191300 |
| H | -3.5586520 | -0.9914070 | 0.0695690  |
| H | -3.1617890 | 0.4264140  | -0.9158320 |
| H | -2.3162330 | -1.1045020 | -1.1932400 |

## 1,2,3-pentatriene (46)

|   |            |            |            |
|---|------------|------------|------------|
| C | -1.3244320 | -0.0410930 | -0.0005950 |
| C | -0.0798850 | -0.2971910 | 0.0004020  |
| C | -2.6161760 | 0.2230770  | 0.0002210  |
| H | -2.9903170 | 1.2450300  | 0.0000240  |
| H | -3.3611050 | -0.5702900 | 0.0001430  |
| C | 1.2135740  | -0.5634310 | -0.0000420 |
| H | 1.5319230  | -1.6078780 | -0.0000530 |
| C | 2.3086720  | 0.4696060  | -0.0000440 |
| H | 2.9543420  | 0.3508390  | -0.8806430 |
| H | 1.9018650  | 1.4840570  | -0.0011160 |
| H | 2.9527690  | 0.3524350  | 0.8819950  |

## E-2,3,4-hexatriene (47)

|   |            |            |            |
|---|------------|------------|------------|
| C | -0.6050850 | -0.1938510 | 0.0012850  |
| C | 0.6050430  | 0.1933830  | -0.0013020 |
| C | -1.8646960 | -0.5925570 | -0.0002700 |
| C | 1.8645440  | 0.5924660  | 0.0000840  |
| H | 2.0734490  | 1.6640250  | 0.0003460  |
| C | 3.0602560  | -0.3232970 | 0.0001120  |
| H | 3.6898270  | -0.1428820 | 0.8821120  |
| H | 2.7584300  | -1.3740520 | -0.0006070 |
| H | 3.6909570  | -0.1419490 | -0.8808440 |
| H | -2.0740050 | -1.6640310 | -0.0008270 |
| C | -3.0600960 | 0.3236330  | 0.0000370  |
| H | -2.7578750 | 1.3742680  | 0.0007450  |
| H | -3.6899710 | 0.1434470  | -0.8817820 |
| H | -3.6906060 | 0.1425080  | 0.8811780  |

## Z-2,3,4-hexatriene (48)

|   |            |            |            |
|---|------------|------------|------------|
| C | -0.6353110 | -0.5039010 | -0.0003140 |
| C | 0.6352120  | -0.5038200 | -0.0005910 |
| C | -1.9564940 | -0.5043400 | 0.0001680  |
| H | -2.4788020 | -1.4630290 | 0.0008670  |
| C | 1.9563770  | -0.5042500 | 0.0002530  |
| H | 2.4787580  | -1.4629150 | 0.0008300  |
| C | 2.8203450  | 0.7294670  | 0.0000870  |
| H | 3.4756340  | 0.7473220  | 0.8815980  |
| H | 3.4759540  | 0.7469810  | -0.8812310 |
| H | 2.2156490  | 1.6402080  | -0.0002680 |
| C | -2.8202530 | 0.7295970  | 0.0000760  |
| H | -3.4753330 | 0.7471610  | -0.8811530 |
| H | -3.4753580 | 0.7476950  | 0.8817020  |
| H | -2.2151550 | 1.6400670  | -0.0004300 |

## 1,5-hexadiene (49)

|   |            |            |            |
|---|------------|------------|------------|
| C | -0.5730780 | -0.2964960 | -0.5198690 |
| H | -0.4838000 | 0.5901110  | -1.1594740 |
| H | -0.4489460 | -1.1718100 | -1.1761520 |
| C | 0.5732010  | -0.2971770 | 0.5200300  |
| H | 0.4840690  | 0.5887440  | 1.1606140  |
| H | 0.4490580  | -1.1732420 | 1.1752230  |
| C | -1.9346740 | -0.3375250 | 0.1178530  |
| H | -2.1393520 | -1.2094620 | 0.7425870  |
| C | -2.8745840 | 0.5992790  | -0.0130430 |
| H | -2.7152360 | 1.4864500  | -0.6231290 |
| H | -3.8403180 | 0.5159200  | 0.4784740  |
| C | 1.9345820  | -0.3374080 | -0.1182680 |
| H | 2.1391780  | -1.2087110 | -0.7439000 |
| C | 2.8745090  | 0.5992940  | 0.0132730  |
| H | 2.7155310  | 1.4856860  | 0.6245910  |
| H | 3.8400730  | 0.5165060  | -0.4786850 |

## 1,5-hexadiyne (50)

|   |            |            |            |
|---|------------|------------|------------|
| C | 0.4822490  | 0.6086770  | 0.0000000  |
| H | 0.2710160  | 1.2312730  | -0.8781860 |
| H | 0.2710160  | 1.2312730  | 0.8781870  |
| C | -0.4822490 | -0.6086770 | 0.0000000  |
| H | -0.2710160 | -1.2312730 | -0.8781870 |
| H | -0.2710160 | -1.2312730 | 0.8781870  |
| C | 1.8863540  | 0.2006470  | 0.0000000  |
| C | 3.0403060  | -0.1546220 | -0.0000010 |
| H | 4.0611300  | -0.4626670 | -0.0000010 |
| C | -1.8863540 | -0.2006470 | 0.0000000  |
| C | -3.0403060 | 0.1546220  | 0.0000010  |
| H | -4.0611300 | 0.4626670  | 0.0000010  |

hexa-1-ene-5-yne (51)

|   |            |            |            |
|---|------------|------------|------------|
| C | 0.6306670  | 0.6146190  | -0.2579790 |
| H | 0.3775870  | 0.7360110  | -1.3195180 |
| H | 0.5725630  | 1.6182800  | 0.1861770  |
| C | -0.4238250 | -0.3046980 | 0.4111630  |
| H | -0.3827490 | -1.2975140 | -0.0510440 |
| H | -0.1461480 | -0.4322630 | 1.4663760  |
| C | 1.9947890  | 0.1020070  | -0.1294360 |
| C | 3.1116800  | -0.3425430 | -0.0132350 |
| H | 4.1013110  | -0.7266940 | 0.0854470  |
| C | -1.8131410 | 0.2612330  | 0.3079290  |
| H | -1.9681800 | 1.2324840  | 0.7820280  |
| C | -2.8348680 | -0.3256240 | -0.3160920 |
| H | -2.7269170 | -1.2929060 | -0.8031720 |
| H | -3.8192790 | 0.1326440  | -0.3603930 |

cyclopentadiene (52)

|   |            |            |            |
|---|------------|------------|------------|
| C | 0.0000000  | 1.1811960  | 0.2817040  |
| C | 0.0000000  | -1.1811960 | 0.2817040  |
| C | 0.0000000  | 0.7349470  | -0.9912320 |
| C | 0.0000000  | -0.7349470 | -0.9912320 |
| H | 0.0000000  | 2.2140510  | 0.6109470  |
| H | 0.0000000  | -2.2140510 | 0.6109470  |
| H | 0.0000000  | 1.3473910  | -1.8872770 |
| H | 0.0000000  | -1.3473910 | -1.8872770 |
| C | 0.0000000  | 0.0000000  | 1.2172810  |
| H | 0.8780920  | 0.0000000  | 1.8816520  |
| H | -0.8780920 | 0.0000000  | 1.8816520  |

2-ethyl-1-butene (53)

|   |            |            |            |
|---|------------|------------|------------|
| C | -2.3811100 | -0.5269700 | -0.1488100 |
| H | -2.4771560 | -0.1740230 | -1.1817100 |
| H | -2.8432280 | 0.2206740  | 0.5054890  |
| C | -0.9174320 | -0.7700000 | 0.2254750  |
| H | -0.8674040 | -1.1818700 | 1.2457840  |
| H | -0.5123670 | -1.5658360 | -0.4168600 |
| C | 1.4520310  | 0.1695410  | 0.5490870  |
| H | 1.9658950  | 1.1283410  | 0.6868310  |
| H | 1.4802860  | -0.3425060 | 1.5227200  |
| C | 0.0083730  | 0.4295780  | 0.1604670  |
| C | -0.3942720 | 1.6508220  | -0.2068640 |
| H | -1.4173270 | 1.8678130  | -0.4983130 |
| H | 0.2982270  | 2.4890800  | -0.2289060 |
| H | -2.9579240 | -1.4537300 | -0.0577360 |
| C | 2.2347520  | -0.6738090 | -0.4743050 |
| H | 3.2721780  | -0.8114550 | -0.1487060 |
| H | 1.7960910  | -1.6691560 | -0.6053160 |
| H | 2.2486810  | -0.1823080 | -1.4535790 |

2-methyl-1-pentene (54)

|   |            |            |            |
|---|------------|------------|------------|
| C | 2.7795670  | -0.2812390 | 0.0000890  |
| H | 2.8882850  | -0.9209810 | -0.8844510 |
| H | 2.8882140  | -0.9201120 | 0.8852660  |
| H | 3.6128470  | 0.4304880  | -0.0002290 |
| C | 1.4297350  | 0.4438900  | -0.0003230 |
| H | 1.3666140  | 1.0994680  | 0.8781010  |
| H | 1.3666410  | 1.0985590  | -0.8794330 |
| C | 0.2426440  | -0.5243340 | 0.0001760  |
| H | 0.3247870  | -1.1941530 | -0.8715210 |
| H | 0.3249930  | -1.1935700 | 0.8723110  |
| C | -2.2755420 | -0.9169200 | -0.0001230 |
| H | -2.2237560 | -1.5730770 | 0.8799450  |
| H | -3.2537180 | -0.4262230 | -0.0003440 |
| H | -2.2233600 | -1.5730650 | -0.8801820 |
| C | -1.1451910 | 0.0848460  | 0.0001140  |
| C | -1.3802490 | 1.4010530  | 0.0001090  |
| H | -0.5824280 | 2.1372250  | 0.0002060  |
| H | -2.3949000 | 1.7916650  | 0.0000790  |

2-methyl-2-pentene (55)

|   |            |            |            |
|---|------------|------------|------------|
| C | 2.6038190  | -0.1847260 | 0.4941320  |
| H | 2.7986310  | -1.2635770 | 0.4628070  |
| H | 2.2850290  | 0.0643580  | 1.5124680  |
| C | 1.5284010  | 0.2145430  | -0.5320380 |
| H | 1.3742200  | 1.2981790  | -0.4939730 |
| H | 1.9106200  | -0.0030460 | -1.5410450 |
| H | 3.5502410  | 0.3318880  | 0.2961390  |
| C | 0.2355030  | -0.5301170 | -0.3291740 |
| C | -0.9824490 | -0.0445490 | -0.0428890 |
| C | -2.1613470 | -0.9730680 | 0.1340610  |
| H | -2.6063130 | -0.8636760 | 1.1334450  |
| H | -2.9594060 | -0.7431270 | -0.5863410 |
| H | -1.8788350 | -2.0224070 | 0.0022760  |
| H | 0.3288410  | -1.6149290 | -0.4187370 |
| C | -1.3133520 | 1.4185940  | 0.1267940  |
| H | -1.7428340 | 1.6051370  | 1.1211310  |
| H | -0.4488760 | 2.0758400  | 0.0081340  |
| H | -2.0747710 | 1.7312980  | -0.6016150 |

## 2-methylpentane (56)

|   |            |            |            |
|---|------------|------------|------------|
| C | 2.8461150  | -0.2121150 | 0.1508480  |
| H | 2.9979440  | -1.2275250 | -0.2358810 |
| H | 2.9048970  | -0.2643950 | 1.2451150  |
| H | 3.6817960  | 0.4054540  | -0.1979530 |
| C | 1.4988220  | 0.3591680  | -0.3046030 |
| H | 1.4022090  | 1.3883370  | 0.0646970  |
| H | 1.4828600  | 0.4255270  | -1.4021720 |
| C | 0.3051820  | -0.4827680 | 0.1669070  |
| H | 0.2943890  | -0.5136520 | 1.2677760  |
| H | 0.4600820  | -1.5211570 | -0.1619600 |
| C | -1.0751890 | -0.0130270 | -0.3338440 |
| H | -1.0277620 | 0.0452460  | -1.4327450 |
| C | -2.1586950 | -1.0381840 | 0.0334820  |
| H | -2.2493260 | -1.1391510 | 1.1230820  |
| H | -3.1396960 | -0.7378530 | -0.3537540 |
| H | -1.9259300 | -2.0295750 | -0.3734950 |
| C | -1.4521210 | 1.3795380  | 0.1954420  |
| H | -1.4850610 | 1.3832480  | 1.2932620  |
| H | -0.7385990 | 2.1485250  | -0.1193920 |
| H | -2.4424860 | 1.6813000  | -0.1659750 |

## 3-methylpentane (57)

|   |            |            |            |
|---|------------|------------|------------|
| C | -2.5865380 | -0.1694240 | -0.2874970 |
| H | -2.5732850 | -0.1957530 | -1.3844630 |
| H | -2.7986160 | 0.8611740  | 0.0170630  |
| H | -3.4267410 | -0.7881600 | 0.0481510  |
| C | -1.2640900 | -0.6837390 | 0.2935330  |
| H | -1.3012890 | -0.6292010 | 1.3919490  |
| H | -1.1640860 | -1.7502330 | 0.0476510  |
| C | 0.0000010  | 0.0501950  | -0.2010450 |
| H | 0.0000030  | 0.0027520  | -1.3026270 |
| C | 1.2640920  | -0.6837340 | 0.2935430  |
| H | 1.1640960  | -1.7502320 | 0.0476710  |
| C | 2.5865370  | -0.1694240 | -0.2875000 |
| H | 2.7986140  | 0.8611840  | 0.0170310  |
| H | 3.4267460  | -0.7881460 | 0.0481620  |
| H | 2.5732810  | -0.1957820 | -1.3844650 |
| H | 1.3012910  | -0.6291840 | 1.3919580  |
| C | -0.0000020 | 1.5316590  | 0.2075010  |
| H | -0.8808700 | 2.0575400  | -0.1752890 |
| H | -0.0000070 | 1.6333040  | 1.3012770  |
| H | 0.8808670  | 2.0575420  | -0.1752830 |

## E-3-methyl-2-pentene (58)

|   |            |            |            |
|---|------------|------------|------------|
| C | -2.3552780 | -0.3447720 | 0.5450020  |
| H | -2.5603570 | 0.7025370  | 0.7928220  |
| H | -2.0136880 | -0.8446840 | 1.4586230  |
| C | -1.3067380 | -0.4749390 | -0.5746410 |
| H | -1.1933290 | -1.5346400 | -0.8340980 |
| H | -1.6937480 | 0.0260090  | -1.4754550 |
| H | -3.3040380 | -0.8027290 | 0.2423780  |
| C | 0.0921900  | 1.6041420  | -0.0524350 |
| H | -0.3209510 | 2.1054740  | -0.9387940 |
| H | -0.5206840 | 1.9259540  | 0.8000030  |
| H | 1.1016060  | 1.9899810  | 0.1071400  |
| C | 0.0520200  | 0.1040090  | -0.2255530 |
| C | 1.1154220  | -0.7047740 | -0.0951920 |
| H | 0.9487980  | -1.7716780 | -0.2552380 |
| C | 2.5345730  | -0.3478970 | 0.2491250  |
| H | 2.8505120  | -0.8531190 | 1.1724110  |
| H | 3.2233950  | -0.6826840 | -0.5388180 |
| H | 2.6893520  | 0.7249620  | 0.3911940  |

## Z-3-methyl-2-pentene (59)

|   |            |            |            |
|---|------------|------------|------------|
| C | 1.7222130  | -1.2654670 | -0.4377580 |
| H | 2.4030110  | -0.5403970 | -0.8977860 |
| H | 1.1032930  | -1.6916850 | -1.2351250 |
| C | 0.8451220  | -0.6130980 | 0.6476100  |
| H | 0.2123570  | -1.3829060 | 1.1011010  |
| H | 1.4970870  | -0.2423580 | 1.4519170  |
| H | 2.3329710  | -2.0709010 | -0.0136620 |
| C | 0.7434010  | 1.8416920  | -0.0628780 |
| H | 1.1580840  | 2.2046520  | 0.8884020  |
| H | 1.5944210  | 1.7275460  | -0.7481180 |
| H | 0.0920310  | 2.6228670  | -0.4676380 |
| C | 0.0031550  | 0.5378140  | 0.1307780  |
| C | -1.3049380 | 0.4479570  | -0.1565280 |
| H | -1.7967710 | 1.3479960  | -0.5300890 |
| C | -2.2089250 | -0.7479460 | -0.0385700 |
| H | -3.0654360 | -0.5293610 | 0.6141490  |
| H | -2.6268810 | -1.0183890 | -1.0181070 |
| H | -1.7043400 | -1.6327700 | 0.3590300  |

## 2-methylpropene (60)

|   |            |            |            |
|---|------------|------------|------------|
| C | 0.0000000  | 1.2780500  | -0.6789490 |
| H | 0.8800490  | 1.3322870  | -1.3350580 |
| H | -0.8800490 | 1.3322870  | -1.3350580 |
| H | 0.0000000  | 2.1632770  | -0.0355860 |
| C | 0.0000000  | 0.0000000  | 0.1229670  |
| C | 0.0000000  | 0.0000000  | 1.4595870  |
| H | 0.0000000  | -0.9246540 | 2.0317330  |
| H | 0.0000000  | 0.9246540  | 2.0317330  |
| C | 0.0000000  | -1.2780500 | -0.6789490 |
| H | -0.8800490 | -1.3322870 | -1.3350580 |
| H | 0.8800490  | -1.3322870 | -1.3350580 |
| H | 0.0000000  | -2.1632770 | -0.0355860 |

## 2-methylbutene (61)

|   |            |            |            |
|---|------------|------------|------------|
| C | -2.0466790 | -0.0374600 | -0.0000170 |
| H | -2.1625420 | 0.5973670  | 0.8855120  |
| H | -2.1625600 | 0.5972500  | -0.8856270 |
| H | -2.8666550 | -0.7637560 | 0.0000350  |
| C | -0.6958450 | -0.7558220 | 0.0000210  |
| H | -0.6409040 | -1.4270190 | 0.8715620  |
| H | -0.6408800 | -1.4270580 | -0.8714890 |
| C | 0.5407970  | 0.1199630  | 0.0000080  |
| C | 0.5042760  | 1.4562640  | 0.0000040  |
| H | -0.4265780 | 2.0150420  | 0.0000360  |
| H | 1.4180550  | 2.0453500  | -0.0000170 |
| C | 1.8495130  | -0.6339490 | -0.0000140 |
| H | 1.9302640  | -1.2869130 | 0.8802440  |
| H | 1.9300770  | -1.2872260 | -0.8800530 |
| H | 2.7093490  | 0.0429860  | -0.0002200 |

## 2-methyl-2-butene (62)

|   |            |            |            |
|---|------------|------------|------------|
| C | 0.6299770  | 1.4581460  | -0.0000020 |
| H | 1.2053410  | 1.7797630  | -0.8795410 |
| H | 1.2052540  | 1.7797710  | 0.8795950  |
| H | -0.3137780 | 2.0083300  | -0.0000470 |
| C | 0.4496580  | -0.0403270 | -0.0000050 |
| C | -0.7343490 | -0.6715470 | -0.0000080 |
| H | -0.7141070 | -1.7628070 | -0.0000110 |
| C | -2.1152160 | -0.0778570 | 0.0000030  |
| H | -2.6836190 | -0.4103590 | -0.8796890 |
| H | -2.6834530 | -0.4099870 | 0.8799440  |
| H | -2.1152700 | 1.0154470  | -0.0002260 |
| C | 1.7412900  | -0.8241830 | 0.0000040  |
| H | 2.3537860  | -0.5805900 | -0.8799270 |
| H | 2.3537890  | -0.5805610 | 0.8799250  |
| H | 1.5638950  | -1.9044010 | 0.0000240  |

## isobutane (63)

|   |            |            |            |
|---|------------|------------|------------|
| C | 0.0000000  | 0.0000000  | 0.3723860  |
| H | 0.0000000  | 0.0000000  | 1.4729970  |
| C | 0.0000000  | 1.4622620  | -0.0957830 |
| H | 0.0000000  | 1.5214110  | -1.1923030 |
| H | -0.8863010 | 1.9976790  | 0.2656140  |
| H | 0.8863010  | 1.9976790  | 0.2656140  |
| C | -1.2663560 | -0.7311310 | -0.0957830 |
| H | -1.3175810 | -0.7607060 | -1.1923030 |
| H | -1.2868900 | -1.7663990 | 0.2656140  |
| H | -2.1731910 | -0.2312800 | 0.2656140  |
| C | 1.2663560  | -0.7311310 | -0.0957830 |
| H | 2.1731910  | -0.2312800 | 0.2656140  |
| H | 1.2868900  | -1.7663990 | 0.2656140  |
| H | 1.3175810  | -0.7607060 | -1.1923030 |

## isopentane (64)

|   |            |            |            |
|---|------------|------------|------------|
| C | 1.7410720  | -0.8232940 | -0.0114140 |
| H | 1.9212420  | -0.8597470 | 1.0712190  |
| H | 1.6465490  | -1.8562880 | -0.3673220 |
| H | 2.6310880  | -0.3868020 | -0.4802890 |
| C | 0.4821530  | -0.0028120 | -0.3296630 |
| H | 0.3476610  | -0.0032400 | -1.4229870 |
| C | -0.7651880 | -0.6629650 | 0.2912360  |
| H | -0.7745820 | -1.7243560 | 0.0058720  |
| H | -0.6681250 | -0.6451320 | 1.3872590  |
| C | -2.1021100 | -0.0320760 | -0.1145020 |
| H | -2.2223770 | -0.0278380 | -1.2052910 |
| H | -2.9438410 | -0.5921930 | 0.3087900  |
| H | -2.1910650 | 1.0031950  | 0.2328150  |
| C | 0.6621650  | 1.4545360  | 0.1217720  |
| H | -0.1902630 | 2.0825280  | -0.1588170 |
| H | 0.7760070  | 1.5131820  | 1.2126110  |
| H | 1.5591590  | 1.8963550  | -0.3284320 |

H<sub>2</sub> (65)

|   |           |           |            |
|---|-----------|-----------|------------|
| H | 0.0000000 | 0.0000000 | 0.3713970  |
| H | 0.0000000 | 0.0000000 | -0.3713970 |



### B3LYP/6-311G(d,p) Optimized Structures (CBS-QB3)

#### 1,3-cyclohexadiene (1)

|   |            |            |            |
|---|------------|------------|------------|
| C | 1.2566190  | -0.7253100 | -0.1069590 |
| C | 1.2566170  | 0.7253130  | 0.1069590  |
| C | 0.1134820  | 1.4227270  | 0.0640640  |
| C | -1.1927440 | 0.7293230  | -0.2435350 |
| C | -1.1927420 | -0.7293260 | 0.2435350  |
| C | 0.1134850  | -1.4227260 | -0.0640640 |
| H | 2.2038480  | -1.2256060 | -0.2801740 |
| H | 2.2038450  | 1.2256110  | 0.2801740  |
| H | 0.1160780  | 2.5011340  | 0.1863340  |
| H | -2.0342210 | 1.2718070  | 0.1963650  |
| H | -1.3498610 | 0.7543750  | -1.3333060 |
| H | -1.3498590 | -0.7543780 | 1.3333060  |
| H | -2.0342180 | -1.2718120 | -0.1963650 |
| H | 0.1160840  | -2.5011330 | -0.1863340 |

#### 1,3-hexadiene (2)

|   |            |            |            |
|---|------------|------------|------------|
| C | -3.1272380 | -0.1663410 | 0.2676120  |
| C | -1.9589160 | 0.4036220  | -0.0473060 |
| C | -0.6815770 | -0.2916810 | -0.0797030 |
| C | 0.4860110  | 0.2841730  | -0.3964090 |
| C | 1.8166040  | -0.4079010 | -0.4296120 |
| C | 2.8321390  | 0.1980000  | 0.5544960  |
| H | -4.0517570 | 0.3981730  | 0.2771550  |
| H | -3.1928810 | -1.2185740 | 0.5264080  |
| H | -1.9369220 | 1.4618810  | -0.3009800 |
| H | -0.6985680 | -1.3513970 | 0.1720680  |
| H | 0.4926320  | 1.3461270  | -0.6433900 |
| H | 1.6824780  | -1.4731600 | -0.2160800 |
| H | 2.2309920  | -0.3427930 | -1.4444530 |
| H | 3.7986960  | -0.3076390 | 0.4800970  |
| H | 2.9947150  | 1.2603770  | 0.3499220  |
| H | 2.4784750  | 0.1077750  | 1.5847850  |

#### 1,3-hexadiyne (3)

|   |            |            |            |
|---|------------|------------|------------|
| C | -3.3352630 | 0.2461520  | 0.0000230  |
| C | -2.1442930 | 0.0464500  | -0.0000170 |
| C | -0.7985150 | -0.1791550 | -0.0000530 |
| C | 0.3942370  | -0.3841030 | 0.0000030  |
| C | 1.8340790  | -0.6067940 | 0.0000480  |
| C | 2.6517110  | 0.6987790  | -0.0000260 |
| H | -4.3826380 | 0.4214220  | 0.0000700  |
| H | 2.0993900  | -1.2096560 | 0.8763910  |
| H | 2.0994290  | -1.2097800 | -0.8761990 |
| H | 3.7207610  | 0.4731960  | 0.0000140  |
| H | 2.4256820  | 1.2983610  | -0.8838790 |
| H | 2.4256410  | 1.2984870  | 0.8837300  |

#### 1,4-hexadiene (5)

|   |            |            |            |
|---|------------|------------|------------|
| C | -2.9847470 | -0.4297410 | -0.1138150 |
| C | -1.8228440 | -0.1310540 | 0.4592340  |
| C | -0.7567180 | 0.7489000  | -0.1455580 |
| C | 0.5395860  | 0.0095500  | -0.3694230 |
| C | 1.7015380  | 0.3069250  | 0.2090800  |
| C | 2.9909700  | -0.4299260 | -0.0065520 |
| H | -3.7096580 | -1.0748880 | 0.3698720  |
| H | -3.2551930 | -0.0356330 | -1.0892170 |
| H | -1.5847930 | -0.5506220 | 1.4351050  |
| H | -1.1254940 | 1.1519390  | -1.0966640 |
| H | -0.5701410 | 1.6047940  | 0.5145050  |
| H | 0.4871230  | -0.8379560 | -1.0521300 |
| H | 1.7412860  | 1.1531760  | 0.8948950  |
| H | 2.8649810  | -1.2631890 | -0.7019280 |
| H | 3.7643110  | 0.2344210  | -0.4084450 |
| H | 3.3808650  | -0.8299650 | 0.9362180  |

#### 1,4-hexadiyne (6)

|   |            |            |            |
|---|------------|------------|------------|
| C | -2.8135620 | -0.8903700 | 0.0000040  |
| C | -1.9520700 | -0.0550030 | -0.0000030 |
| C | -0.9150880 | 0.9823960  | 0.0000040  |
| C | 0.4534100  | 0.4554950  | -0.0000070 |
| C | 1.5793520  | 0.0349960  | -0.0000020 |
| C | 2.9416170  | -0.4845770 | 0.0000000  |
| H | -3.5708330 | -1.6352190 | -0.0000010 |
| H | -1.0585560 | 1.6280290  | 0.8754070  |
| H | -1.0585630 | 1.6280490  | -0.8753840 |
| H | 2.9419600  | -1.5783900 | -0.0001870 |
| H | 3.4920810  | -0.1498950 | -0.8839950 |
| H | 3.4919610  | -0.1502000 | 0.8841860  |

#### 2-butene (7)

|   |            |            |            |
|---|------------|------------|------------|
| C | 1.9608200  | 0.0790650  | 0.0000320  |
| C | 0.5364480  | -0.3941760 | -0.0001350 |
| C | -0.5364490 | 0.3941800  | 0.0000040  |
| C | -1.9608180 | -0.0790680 | 0.0000460  |
| H | 2.5021190  | -0.2898590 | 0.8786780  |
| H | 2.5023920  | -0.2900360 | -0.8783650 |
| H | 2.0205280  | 1.1702310  | -0.0000570 |
| H | 0.3899720  | -1.4742440 | -0.0003490 |
| H | -0.3899770 | 1.4742480  | 0.0001790  |
| H | -2.0205210 | -1.1702330 | -0.0009080 |
| H | -2.5019590 | 0.2891400  | 0.8790940  |
| H | -2.5025560 | 0.2907450  | -0.8779460 |

2-pentene (8)

|   |            |            |            |
|---|------------|------------|------------|
| C | -2.3388900 | -0.4617880 | 0.2703160  |
| C | -1.2996680 | 0.5609590  | -0.2173350 |
| C | 0.0666350  | -0.0367990 | -0.4081270 |
| C | 1.1694150  | 0.3342220  | 0.2398060  |
| C | 2.5314290  | -0.2685800 | 0.0540010  |
| H | -3.3269860 | -0.0036710 | 0.3687010  |
| H | -2.4279330 | -1.2981380 | -0.4297090 |
| H | -2.0552860 | -0.8722340 | 1.2430730  |
| H | -1.2387420 | 1.3940920  | 0.4905680  |
| H | -1.6452570 | 0.9860490  | -1.1687840 |
| H | 0.1335690  | -0.8480400 | -1.1345350 |
| H | 1.0987780  | 1.1429980  | 0.9671210  |
| H | 2.5175660  | -1.0690900 | -0.6896200 |
| H | 3.2577730  | 0.4845600  | -0.2721700 |
| H | 2.9129920  | -0.6846080 | 0.9933870  |

2-pentyne (9)

|   |            |            |            |
|---|------------|------------|------------|
| C | 2.6476410  | 0.2275000  | 0.0004250  |
| C | 1.2222460  | -0.0821890 | -0.0007650 |
| C | 0.0474380  | -0.3447540 | -0.0006260 |
| C | -1.3854580 | -0.6374710 | 0.0003630  |
| C | -2.2641980 | 0.6262830  | 0.0000230  |
| H | 2.8217190  | 1.2897200  | -0.1959290 |
| H | 3.1042040  | -0.0109920 | 0.9657710  |
| H | 3.1776430  | -0.3431680 | -0.7681330 |
| H | -1.6287140 | -1.2515320 | -0.8744870 |
| H | -1.6275500 | -1.2502510 | 0.8764330  |
| H | -3.3235150 | 0.3562070  | 0.0010380  |
| H | -2.0642030 | 1.2375780  | 0.8826820  |
| H | -2.0656010 | 1.2362190  | -0.8838930 |

hexa-1-ene-3-yne (10)

|   |            |            |            |
|---|------------|------------|------------|
| C | 3.1142850  | -0.2616060 | 0.0720300  |
| C | 2.0441570  | 0.5327830  | -0.0455710 |
| C | 0.6936970  | 0.0878480  | -0.0432190 |
| C | -0.4640390 | -0.2563690 | -0.0459500 |
| C | -1.8659440 | -0.6643130 | -0.0460410 |
| C | -2.8453190 | 0.5170200  | 0.0734170  |
| H | 4.1159820  | 0.1506130  | 0.0613600  |
| H | 3.0155650  | -1.3352290 | 0.1807500  |
| H | 2.1903090  | 1.6055970  | -0.1528600 |
| H | -2.0749580 | -1.2237300 | -0.9657330 |
| H | -2.0338970 | -1.3671250 | 0.7784760  |
| H | -3.8774760 | 0.1577080  | 0.0689510  |
| H | -2.6770760 | 1.0683770  | 1.0008870  |
| H | -2.7194740 | 1.2116070  | -0.7598280 |

hexa-1-ene-4-yne (11)

|   |            |            |            |
|---|------------|------------|------------|
| C | -2.8326490 | -0.5879540 | 0.2926650  |
| C | -1.7827760 | -0.2066430 | -0.4253230 |
| C | -0.8168020 | 0.8845460  | -0.0198550 |
| C | 0.5756410  | 0.4306470  | 0.0148680  |
| C | 1.7148570  | 0.0435410  | 0.0320190  |
| C | 3.0961980  | -0.4236720 | 0.0615290  |
| H | -3.5000980 | -1.3701390 | -0.0507060 |
| H | -3.0636570 | -0.1338110 | 1.2516600  |
| H | -1.5707600 | -0.6889410 | -1.3764230 |
| H | -0.8984480 | 1.7185980  | -0.7302510 |
| H | -1.1038970 | 1.2840790  | 0.9588800  |
| H | 3.1458060  | -1.5122510 | -0.0358300 |
| H | 3.6801390  | 0.0113660  | -0.7549730 |
| H | 3.5841050  | -0.1516960 | 1.0022310  |

hexa-1-yne-3-ene (12)

|   |            |            |            |
|---|------------|------------|------------|
| C | 3.2157340  | -0.3674710 | -0.0052990 |
| C | 2.0782130  | 0.0198050  | -0.0961820 |
| C | 0.7499490  | 0.5078700  | -0.2322800 |
| C | -0.3158660 | -0.0050450 | 0.3983730  |
| C | -1.7195590 | 0.5005240  | 0.2536200  |
| C | -2.6851970 | -0.5684880 | -0.2863970 |
| H | 4.2150710  | -0.7163040 | 0.0821470  |
| H | 0.6179890  | 1.3584270  | -0.8984860 |
| H | -0.1699660 | -0.8572970 | -1.0591040 |
| H | -2.0794920 | 0.8355240  | 1.2352320  |
| H | -1.7302350 | 1.3784860  | -0.3999620 |
| H | -3.7035710 | -0.1762890 | -0.3489030 |
| H | -2.3846580 | -0.8979900 | -1.2841320 |
| H | -2.7047720 | -1.4477260 | 0.3639910  |

hexa-1-yne-4-ene (13)

|   |            |            |            |
|---|------------|------------|------------|
| C | 2.9433960  | -0.7393160 | -0.1402580 |
| C | 2.0011460  | -0.0004090 | -0.0427610 |
| C | 0.8444080  | 0.8881120  | 0.0878710  |
| C | -0.4352100 | 0.1492680  | 0.4114330  |
| C | -1.5437620 | 0.2106400  | -0.3207340 |
| C | -2.8256590 | -0.5042410 | -0.0102150 |
| H | 3.7761990  | -1.3922450 | -0.2311040 |
| H | 1.0579850  | 1.6197940  | 0.8785660  |
| H | 0.7180530  | 1.4608550  | -0.8370040 |
| H | -0.4113580 | -0.4642290 | 1.3097070  |
| H | -1.5415360 | 0.8213150  | -1.2232840 |
| H | -2.7451300 | -1.0940240 | 0.9057040  |
| H | -3.6533500 | 0.2032730  | 0.1116580  |
| H | -3.1067810 | -1.1790690 | -0.8262630 |

propane (14)

|   |            |            |            |
|---|------------|------------|------------|
| C | 0.0000000  | 1.2769660  | -0.2595640 |
| C | 0.0000000  | -1.2769660 | -0.2595640 |
| C | 0.0000000  | 0.0000000  | 0.5855420  |
| H | 0.0000000  | 2.1733910  | 0.3667780  |
| H | 0.0000000  | -2.1733910 | 0.3667780  |
| H | -0.8827400 | 1.3223730  | -0.9053690 |
| H | 0.8827400  | 1.3223730  | -0.9053690 |
| H | 0.8827400  | -1.3223730 | -0.9053690 |
| H | -0.8827400 | -1.3223730 | -0.9053690 |
| H | -0.8755120 | 0.0000000  | 1.2447210  |
| H | 0.8755120  | 0.0000000  | 1.2447210  |

propene (15)

|   |            |            |            |
|---|------------|------------|------------|
| C | 1.2903420  | 0.1533120  | 0.0000000  |
| C | 0.0000000  | 0.4729620  | 0.0000000  |
| C | -1.1363990 | -0.5067200 | 0.0000000  |
| H | 2.0647520  | 0.9120640  | 0.0000000  |
| H | 1.6205040  | -0.8815130 | 0.0000000  |
| H | -0.2791550 | 1.5254200  | 0.0000000  |
| H | -0.7771370 | -1.5384800 | 0.0000000  |
| H | -1.7763130 | -0.3674090 | 0.8784580  |
| H | -1.7763130 | -0.3674090 | -0.8784580 |

propyne (16)

|   |            |            |            |
|---|------------|------------|------------|
| C | 0.0000000  | 0.0000000  | 0.2191710  |
| C | 0.0000000  | 0.0000000  | 1.4200720  |
| C | 0.0000000  | 0.0000000  | -1.2379520 |
| H | 0.0000000  | 1.0209490  | -1.6299500 |
| H | -0.8841680 | -0.5104740 | -1.6299500 |
| H | 0.8841680  | -0.5104740 | -1.6299500 |
| H | 0.0000000  | 0.0000000  | 2.4821030  |

ethane (17)

|   |            |            |            |
|---|------------|------------|------------|
| C | 0.0000000  | 0.7651740  | 0.0000000  |
| C | 0.0000000  | -0.7651740 | 0.0000000  |
| H | -0.5092270 | 1.1636760  | 0.8819200  |
| H | 0.5092270  | -1.1636760 | -0.8819200 |
| H | -0.5092270 | 1.1636760  | -0.8819200 |
| H | 0.5092270  | -1.1636760 | 0.8819200  |
| H | 1.0183490  | 1.1637400  | 0.0000000  |
| H | -1.0183490 | -1.1637400 | 0.0000000  |

1,3-butadiene (18)

|   |            |            |           |
|---|------------|------------|-----------|
| C | 0.6010020  | 1.7477170  | 0.0000000 |
| C | 0.6010020  | 0.4108460  | 0.0000000 |
| H | -0.3251110 | 2.3141120  | 0.0000000 |
| H | 1.5224870  | 2.3173360  | 0.0000000 |
| H | 1.5495400  | -0.1225190 | 0.0000000 |
| C | -0.6010020 | -0.4108460 | 0.0000000 |
| C | -0.6010020 | -1.7477170 | 0.0000000 |
| H | -1.5495400 | 0.1225190  | 0.0000000 |
| H | -1.5224870 | -2.3173360 | 0.0000000 |
| H | 0.3251110  | -2.3141120 | 0.0000000 |

1,3-butadiyne (19)

|   |           |           |            |
|---|-----------|-----------|------------|
| H | 0.0000000 | 0.0000000 | 2.9515080  |
| C | 0.0000000 | 0.0000000 | 1.8891200  |
| C | 0.0000000 | 0.0000000 | 0.6826060  |
| C | 0.0000000 | 0.0000000 | -0.6826060 |
| C | 0.0000000 | 0.0000000 | -1.8891200 |
| H | 0.0000000 | 0.0000000 | -2.9515080 |

allene (20)

|   |            |            |            |
|---|------------|------------|------------|
| C | 0.0000000  | 0.0000000  | 1.3023510  |
| C | 0.0000000  | 0.0000000  | 0.0000000  |
| C | 0.0000000  | 0.0000000  | -1.3023510 |
| H | -0.9270000 | 0.0000000  | -1.8672660 |
| H | 0.9270000  | 0.0000000  | -1.8672660 |
| H | 0.0000000  | 0.9270000  | 1.8672660  |
| H | 0.0000000  | -0.9270000 | 1.8672660  |

butatriene (21)

|   |           |            |            |
|---|-----------|------------|------------|
| C | 0.0000000 | 0.0000000  | 0.6326720  |
| C | 0.0000000 | 0.0000000  | -0.6326720 |
| C | 0.0000000 | 0.0000000  | 1.9465820  |
| C | 0.0000000 | 0.0000000  | -1.9465820 |
| H | 0.0000000 | 0.9262230  | -2.5132960 |
| H | 0.0000000 | -0.9262230 | -2.5132960 |
| H | 0.0000000 | 0.9262230  | 2.5132960  |
| H | 0.0000000 | -0.9262230 | 2.5132960  |

ethene (22)

|   |           |            |            |
|---|-----------|------------|------------|
| C | 0.0000000 | 0.0000000  | 0.6634640  |
| C | 0.0000000 | 0.0000000  | -0.6634640 |
| H | 0.0000000 | 0.9224650  | -1.2347260 |
| H | 0.0000000 | -0.9224650 | -1.2347260 |
| H | 0.0000000 | -0.9224650 | 1.2347260  |
| H | 0.0000000 | 0.9224650  | 1.2347260  |

## vinylacetylene (23)

|   |            |            |           |
|---|------------|------------|-----------|
| C | -0.4499720 | 1.8608130  | 0.0000000 |
| C | 0.0000000  | 0.7434700  | 0.0000000 |
| H | -0.8614940 | 2.8401040  | 0.0000000 |
| C | 0.5768330  | -0.5568020 | 0.0000000 |
| H | 1.6634870  | -0.5939350 | 0.0000000 |
| C | -0.1227200 | -1.6962490 | 0.0000000 |
| H | 0.3793390  | -2.6560350 | 0.0000000 |
| H | -1.2061770 | -1.6975230 | 0.0000000 |

## methane (24)

|   |            |            |            |
|---|------------|------------|------------|
| C | 0.0000000  | 0.0000110  | 0.0000000  |
| H | -1.0471500 | 0.3052210  | 0.0000000  |
| H | 0.0612580  | -1.0890010 | 0.0000000  |
| H | 0.4929460  | 0.3918570  | 0.8905750  |
| H | 0.4929460  | 0.3918570  | -0.8905750 |

## butane (25)

|   |            |            |            |
|---|------------|------------|------------|
| C | -0.4207410 | 0.6407730  | 0.0000000  |
| C | 0.4207410  | -0.6407730 | 0.0000000  |
| C | 0.4207410  | 1.9200650  | 0.0000000  |
| C | -0.4207410 | -1.9200650 | 0.0000000  |
| H | -1.0807790 | 0.6374690  | 0.8762790  |
| H | -1.0807790 | 0.6374690  | -0.8762790 |
| H | 1.0807790  | -0.6374690 | 0.8762790  |
| H | 1.0807790  | -0.6374690 | -0.8762790 |
| H | 0.2093130  | -2.8138420 | 0.0000000  |
| H | -0.2093130 | 2.8138420  | 0.0000000  |
| H | -1.0659160 | -1.9692190 | -0.8829220 |
| H | -1.0659160 | -1.9692190 | 0.8829220  |
| H | 1.0659160  | 1.9692190  | -0.8829220 |
| H | 1.0659160  | 1.9692190  | 0.8829220  |

## acetylene (26)

|   |           |           |            |
|---|-----------|-----------|------------|
| H | 0.0000000 | 0.0000000 | 1.6619260  |
| C | 0.0000000 | 0.0000000 | 0.5990750  |
| C | 0.0000000 | 0.0000000 | -0.5990750 |
| H | 0.0000000 | 0.0000000 | -1.6619260 |

## hexadienyne (27)

|   |            |            |           |
|---|------------|------------|-----------|
| C | -0.1695360 | 3.0011880  | 0.0000000 |
| C | 0.1695360  | -3.0011880 | 0.0000000 |
| C | 0.6260040  | 1.9232590  | 0.0000000 |
| C | -0.6260040 | -1.9232590 | 0.0000000 |
| C | 0.1695360  | 0.5816510  | 0.0000000 |
| C | -0.1695360 | -0.5816510 | 0.0000000 |
| H | -1.2491750 | 2.9102160  | 0.0000000 |
| H | 1.2491750  | -2.9102160 | 0.0000000 |
| H | 0.2490540  | 4.0001460  | 0.0000000 |
| H | -0.2490540 | -4.0001460 | 0.0000000 |
| H | 1.7051890  | 2.0593030  | 0.0000000 |
| H | -1.7051890 | -2.0593030 | 0.0000000 |

## hexadiyneene (28)

|   |            |            |           |
|---|------------|------------|-----------|
| C | 0.5038690  | 3.0133170  | 0.0000000 |
| C | -0.5038690 | -3.0133170 | 0.0000000 |
| C | 0.5038690  | 1.8079170  | 0.0000000 |
| C | -0.5038690 | -1.8079170 | 0.0000000 |
| C | 0.5485950  | 0.3930900  | 0.0000000 |
| C | -0.5485950 | -0.3930900 | 0.0000000 |
| H | 0.4937130  | 4.0756410  | 0.0000000 |
| H | -0.4937130 | -4.0756410 | 0.0000000 |
| H | 1.5324680  | -0.0670820 | 0.0000000 |
| H | -1.5324680 | 0.0670820  | 0.0000000 |

## pentane (29)

|   |            |            |            |
|---|------------|------------|------------|
| C | 0.0000000  | 1.2836440  | -0.5224810 |
| C | 0.0000000  | -1.2836440 | -0.5224810 |
| C | 0.0000000  | 0.0000000  | 0.3149950  |
| C | 0.0000000  | 2.5598460  | 0.3237730  |
| C | 0.0000000  | -2.5598460 | 0.3237730  |
| H | 0.8761330  | 1.2829440  | -1.1823580 |
| H | -0.8761330 | 1.2829440  | -1.1823580 |
| H | 0.8761330  | -1.2829440 | -1.1823580 |
| H | -0.8761330 | -1.2829440 | -1.1823580 |
| H | 0.8767240  | 0.0000000  | 0.9760470  |
| H | -0.8767240 | 0.0000000  | 0.9760470  |
| H | 0.0000000  | -3.4561500 | -0.3026530 |
| H | 0.0000000  | 3.4561500  | -0.3026530 |
| H | -0.8827320 | -2.6060150 | 0.9692930  |
| H | 0.8827320  | -2.6060150 | 0.9692930  |
| H | -0.8827320 | 2.6060150  | 0.9692930  |
| H | 0.8827320  | 2.6060150  | 0.9692930  |

## 2-butyne (30)

|   |            |            |            |
|---|------------|------------|------------|
| C | -2.0601790 | -0.0000060 | 0.0000010  |
| C | -0.6014780 | 0.0001420  | 0.0000820  |
| H | -2.4562370 | -0.8856810 | -0.5058990 |
| H | -2.4563550 | 0.8808940  | -0.5140940 |
| H | -2.4564050 | 0.0047000  | 1.0198990  |
| H | 2.4561120  | 0.8857890  | 0.5059060  |
| C | 0.6014770  | -0.0002260 | -0.0001300 |
| H | 2.4564660  | -0.0046680 | -1.0198510 |
| C | 2.0601800  | 0.0000490  | 0.0000230  |
| H | 2.4564160  | -0.8807890 | 0.5141790  |

1-butyne (31)

|   |            |            |            |
|---|------------|------------|------------|
| C | -1.3327800 | -1.4608640 | 0.0000000  |
| C | -0.7397090 | -0.4157120 | 0.0000000  |
| H | -1.8587130 | -2.3836090 | 0.0000000  |
| C | 0.0000000  | 0.8443820  | 0.0000000  |
| C | 1.5268410  | 0.6507600  | 0.0000000  |
| H | -0.2976930 | 1.4314130  | 0.8760210  |
| H | -0.2976930 | 1.4314130  | -0.8760210 |
| H | 2.0325780  | 1.6195210  | 0.0000000  |
| H | 1.8477050  | 0.0949340  | -0.8833990 |
| H | 1.8477050  | 0.0949340  | 0.8833990  |

1-butene (32)

|   |            |            |            |
|---|------------|------------|------------|
| C | -1.8578460 | 0.0172280  | -0.2807720 |
| H | -0.6767910 | -1.2166870 | 0.9186960  |
| C | -0.7241440 | -0.2940710 | 0.3404130  |
| H | -2.7341240 | -0.6186610 | -0.2217080 |
| C | 0.5390070  | 0.5199660  | 0.3080690  |
| C | 1.7277010  | -0.2467940 | -0.2942200 |
| H | 0.3653880  | 1.4420560  | -0.2559900 |
| H | 0.7965620  | 0.8221270  | 1.3314780  |
| H | 2.6368760  | 0.3601460  | -0.2742090 |
| H | 1.9287060  | -1.1663370 | 0.2637520  |
| H | 1.5268620  | -0.5250010 | -1.3321080 |
| H | -1.9517870 | 0.9243770  | -0.8708530 |

1-pentene (33)

|   |            |            |            |
|---|------------|------------|------------|
| C | -2.4813130 | -0.2177080 | -0.3037620 |
| C | -1.4194260 | 0.3409440  | 0.2694980  |
| C | -0.0754350 | -0.3104320 | 0.4336660  |
| C | 1.0566790  | 0.4481420  | -0.2828250 |
| C | 2.4298320  | -0.1971640 | -0.0786180 |
| H | -0.1183700 | -1.3414900 | 0.0652610  |
| H | 0.1686490  | -0.3698090 | 1.5033930  |
| H | -1.5018110 | 1.3586940  | 0.6501610  |
| H | -3.4238230 | 0.3102700  | -0.3969020 |
| H | -2.4472990 | -1.2288750 | -0.6990840 |
| H | 0.8260300  | 0.5014950  | -1.3523270 |
| H | 1.0802400  | 1.4835500  | 0.0769630  |
| H | 3.2128570  | 0.3601410  | -0.5997160 |
| H | 2.6968500  | -0.2329670 | 0.9822460  |
| H | 2.4446510  | -1.2237010 | -0.4577450 |

1-pentyne (34)

|   |            |            |            |
|---|------------|------------|------------|
| C | 2.6400510  | -0.2422150 | 0.0003260  |
| C | 1.5071850  | 0.1588180  | -0.0003890 |
| C | 0.1226270  | 0.6230590  | -0.0000490 |
| C | -0.9079840 | -0.5247180 | -0.0002300 |
| C | -2.3492240 | -0.0114750 | 0.0002160  |
| H | -0.0426220 | 1.2610580  | -0.8765780 |
| H | -0.0422500 | 1.2604960  | 0.8769560  |
| H | 3.6421040  | -0.5942740 | 0.0003210  |

|   |            |            |            |
|---|------------|------------|------------|
| H | -0.7328480 | -1.1555450 | -0.8768900 |
| H | -0.7325060 | -1.1561200 | 0.8759460  |
| H | -3.0620650 | -0.8398000 | 0.0000980  |
| H | -2.5526950 | 0.6014060  | 0.8838910  |
| H | -2.5530480 | 0.6019620  | -0.8829920 |

1,3-pentadiene (35)

|   |            |            |            |
|---|------------|------------|------------|
| C | -1.3592000 | 0.3942400  | -0.0000030 |
| H | -1.3623340 | 1.4827180  | -0.0000020 |
| C | -2.5258230 | -0.2599520 | -0.0000270 |
| H | -3.4730500 | 0.2656280  | -0.0000540 |
| H | -2.5673200 | -1.3447340 | -0.0000570 |
| C | -0.0523050 | -0.2442700 | -0.0000120 |
| H | -0.0430210 | -1.3335150 | -0.0000190 |
| C | 1.1119520  | 0.4181840  | 0.0000030  |
| H | 1.0886020  | 1.5072200  | 0.0000130  |
| C | 2.4682500  | -0.2165100 | 0.0000360  |
| H | 3.0487450  | 0.0898160  | -0.8779370 |
| H | 3.0486510  | 0.0896940  | 0.8781150  |
| H | 2.4024790  | -1.3069730 | -0.0000430 |

1,3-pentadiyne (36)

|   |            |            |            |
|---|------------|------------|------------|
| C | 0.0000000  | 0.0000000  | 1.5156950  |
| C | 0.0000000  | 0.0000000  | 2.7232080  |
| H | 0.0000000  | 0.0000000  | 3.7851620  |
| C | 0.0000000  | 0.0000000  | 0.1510430  |
| C | 0.0000000  | 0.0000000  | -1.0583090 |
| C | 0.0000000  | 0.0000000  | -2.5110940 |
| H | 0.0000000  | 1.0216230  | -2.9028070 |
| H | 0.8847510  | -0.5108110 | -2.9028070 |
| H | -0.8847510 | -0.5108110 | -2.9028070 |

1,4-pentadiene (37)

|   |            |            |            |
|---|------------|------------|------------|
| C | 0.0000000  | 0.6660240  | -0.0000170 |
| H | -0.3123320 | 1.3172230  | 0.8252040  |
| H | 0.3123320  | 1.3171830  | -0.8252710 |
| C | -1.1752180 | -0.1749810 | -0.4341220 |
| H | -0.9942180 | -0.8274810 | -1.2862930 |
| C | -2.3693260 | -0.1798110 | 0.1501950  |
| H | -2.5864780 | 0.4532270  | 1.0057170  |
| H | -3.1746780 | -0.8123340 | -0.2060240 |
| C | 1.1752200  | -0.1749540 | 0.4341340  |
| H | 0.9942160  | -0.8274150 | 1.2863350  |
| C | 2.3693260  | -0.1798180 | -0.1501860 |
| H | 2.5864740  | 0.4531680  | -1.0057480 |
| H | 3.1746740  | -0.8123330 | 0.2060570  |

1,4-pentadiyne (38)

|   |            |            |            |
|---|------------|------------|------------|
| C | 0.0000000  | 1.2282990  | 0.0697450  |
| C | 0.0000000  | 2.2435150  | -0.5693320 |
| H | 0.0000000  | 3.1387750  | -1.1411780 |
| C | 0.0000000  | 0.0000000  | 0.8696810  |
| H | 0.8760560  | 0.0000000  | 1.5296580  |
| H | -0.8760560 | 0.0000000  | 1.5296580  |
| C | 0.0000000  | -1.2282990 | 0.0697450  |
| C | 0.0000000  | -2.2435150 | -0.5693320 |
| H | 0.0000000  | -3.1387750 | -1.1411780 |

penta-1-ene-3-yne (39)

|   |            |            |            |
|---|------------|------------|------------|
| C | 1.2757570  | 0.8661820  | 0.0000000  |
| H | 1.2700400  | 1.9541530  | 0.0000000  |
| C | 2.4480240  | 0.2213510  | 0.0000000  |
| H | 3.3831510  | 0.7681870  | 0.0000000  |
| H | 2.5008960  | -0.8609670 | 0.0000000  |
| C | 0.0000000  | 0.2380920  | 0.0000000  |
| C | -1.1024810 | -0.2532040 | 0.0000000  |
| C | -2.4233370 | -0.8660020 | 0.0000000  |
| H | -2.5652320 | -1.4962400 | 0.8833480  |
| H | -3.2114010 | -0.1074010 | 0.0000000  |
| H | -2.5652320 | -1.4962400 | -0.8833480 |

penta-1-ene-4-yne (40)

|   |            |            |            |
|---|------------|------------|------------|
| C | -0.0390610 | 0.7725660  | 0.0920760  |
| H | -0.1127200 | 1.5235330  | 0.8900310  |
| H | 0.1945770  | 1.3185180  | -0.8279870 |
| C | 1.0813020  | -0.1917910 | 0.4138200  |
| H | 0.9311090  | -0.8066170 | 1.2974850  |
| C | 2.1932210  | -0.3134130 | -0.3012350 |
| H | 2.3652230  | 0.2793530  | -1.1945860 |
| H | 2.9731450  | -1.0117910 | -0.0203620 |
| C | -1.3384170 | 0.1123480  | -0.0437020 |
| C | -2.3993150 | -0.4418200 | -0.1450630 |
| H | -3.3377120 | -0.9303350 | -0.2399610 |

penta-1-yne-3-ene (41)

|   |            |            |            |
|---|------------|------------|------------|
| C | 0.0930520  | 0.4769300  | -0.0001970 |
| H | -0.1169950 | 1.5448360  | 0.0001790  |
| C | -0.9251990 | -0.3943550 | -0.0001970 |
| H | -0.6983240 | -1.4576510 | -0.0004460 |
| C | 1.4662600  | 0.1090300  | -0.0003530 |
| C | 2.6398840  | -0.1645600 | 0.0003060  |
| H | 3.6712640  | -0.4180900 | 0.0006430  |
| C | -2.3713710 | -0.0110360 | 0.0002230  |
| H | -2.8846900 | -0.4186630 | -0.8779730 |
| H | -2.8845100 | -0.4197480 | 0.8780130  |
| H | -2.5025030 | 1.0732660  | 0.0008930  |

2,4-hexadiene (42)

|   |            |            |            |
|---|------------|------------|------------|
| C | 3.1858120  | 0.1398440  | 0.0000290  |
| H | 3.7526430  | -0.1908910 | 0.8782590  |
| H | 3.7528520  | -0.1913390 | -0.8778940 |
| H | 3.1695720  | 1.2323750  | -0.0002460 |
| C | 1.8011660  | -0.4319790 | 0.0000170  |
| H | 1.7279340  | -1.5188160 | 0.0000740  |
| C | 0.6689470  | 0.2843360  | -0.0000380 |
| H | 0.7338320  | 1.3719630  | -0.0001060 |
| C | -0.6689480 | -0.2843370 | -0.0000150 |
| H | -0.7338340 | -1.3719650 | 0.0000190  |
| C | -1.8011650 | 0.4319810  | -0.0000220 |
| H | -1.7279300 | 1.5188170  | -0.0000530 |
| C | -3.1858120 | -0.1398440 | 0.0000110  |
| H | -3.7527440 | 0.1910570  | -0.8780890 |
| H | -3.1695670 | -1.2323740 | 0.0000810  |
| H | -3.7527510 | 0.1911710  | 0.8780640  |

2,4-hexadiyne (43)

|   |            |            |            |
|---|------------|------------|------------|
| C | 0.0000000  | 0.0000000  | 0.6824130  |
| C | 0.0000000  | 0.0000000  | 1.8923780  |
| C | 0.0000000  | 0.0000000  | 3.3460090  |
| H | 0.5104040  | 0.8843980  | 3.7397760  |
| H | -1.0211130 | -0.0001760 | 3.7397760  |
| H | 0.5107090  | -0.8842220 | 3.7397760  |
| C | 0.0000000  | 0.0000000  | -0.6824130 |
| C | 0.0000000  | 0.0000000  | -1.8923780 |
| C | 0.0000000  | 0.0000000  | -3.3460090 |
| H | -0.5107090 | -0.8842220 | -3.7397760 |
| H | -0.5104040 | 0.8843980  | -3.7397760 |
| H | 1.0211130  | -0.0001760 | -3.7397760 |

hexa-2-ene-4-yne (44)

|   |            |            |            |
|---|------------|------------|------------|
| C | 0.7136980  | 0.5255670  | 0.0000300  |
| H | 0.9941710  | 1.5778630  | 0.0001630  |
| C | 1.6804720  | -0.4032770 | -0.0000900 |
| H | 1.3931890  | -1.4519430 | -0.0001900 |
| C | 3.1469850  | -0.1031220 | -0.0002320 |
| H | 3.6387160  | -0.5386620 | 0.8771820  |
| H | 3.6381000  | -0.5368330 | -0.8789280 |
| H | 3.3386010  | 0.9724040  | 0.0007610  |
| C | -0.6804930 | 0.2479650  | -0.0000210 |
| C | -1.8722560 | 0.0552140  | -0.0001870 |
| C | -3.3071510 | -0.1947280 | 0.0003640  |
| H | -3.8704830 | 0.7396990  | -0.0794980 |
| H | -3.5982530 | -0.8325650 | -0.8400490 |
| H | -3.6215650 | -0.6956780 | 0.9213810  |

1,2,3-hexatriene (45)

|   |            |            |            |
|---|------------|------------|------------|
| C | 0.7313400  | 0.3633760  | -0.0326380 |
| C | 1.9450560  | 0.0059820  | -0.0445440 |
| C | -0.5332920 | 0.7308550  | -0.0154390 |
| C | 3.2074250  | -0.3622600 | -0.0584730 |
| H | 3.5312620  | -1.2923230 | 0.3983850  |
| H | -0.8078070 | 1.6729860  | -0.4907320 |
| C | -1.6580630 | -0.0594280 | 0.6025620  |
| H | -2.1173820 | 0.5472450  | 1.3938110  |
| H | -1.2539370 | -0.9541200 | 1.0818240  |
| H | 3.9706270  | 0.2510630  | -0.5275670 |
| C | -2.7389910 | -0.4447160 | -0.4206290 |
| H | -3.5561030 | -0.9851370 | 0.0644720  |
| H | -3.1630160 | 0.4416700  | -0.9014210 |
| H | -2.3244960 | -1.0842380 | -1.2038070 |

1,2,3-pentatriene (46)

|   |            |            |            |
|---|------------|------------|------------|
| C | -1.3199030 | -0.0403420 | -0.0004590 |
| C | -0.0810040 | -0.2969440 | 0.0001470  |
| C | -2.6083280 | 0.2232510  | 0.0001560  |
| H | -2.9774430 | 1.2441710  | -0.0006050 |
| H | -3.3480670 | -0.5713640 | 0.0008910  |
| C | 1.2089090  | -0.5624920 | -0.0002020 |
| H | 1.5219010  | -1.6060580 | 0.0004450  |
| C | 2.3028820  | 0.4687440  | 0.0001310  |
| H | 2.9457860  | 0.3492130  | -0.8791570 |
| H | 1.8976250  | 1.4809630  | -0.0003970 |
| H | 2.9448530  | 0.3497710  | 0.8801820  |

E-2,3,4-hexatriene (47)

|   |            |            |            |
|---|------------|------------|------------|
| C | 0.6023170  | -0.1937360 | -0.0011220 |
| C | -0.6023090 | 0.1936640  | 0.0008570  |
| C | 1.8583860  | -0.5917040 | 0.0001410  |
| C | -1.8583600 | 0.5916860  | -0.0002730 |
| H | -2.0620560 | 1.6616310  | -0.0006570 |
| C | -3.0530250 | -0.3226980 | 0.0001290  |
| H | -3.6805200 | -0.1415440 | -0.8797420 |
| H | -2.7522220 | -1.3707340 | 0.0005630  |
| H | -3.6806760 | -0.1408600 | 0.8797500  |
| H | 2.0621450  | -1.6616360 | -0.0000520 |
| C | 3.0529980  | 0.3227520  | 0.0001780  |
| H | 2.7521320  | 1.3707700  | 0.0003310  |
| H | 3.6805450  | 0.1411500  | 0.8799180  |
| H | 3.6806180  | 0.1414360  | -0.8795750 |

Z-2,3,4-hexatriene (48)

|   |            |            |            |
|---|------------|------------|------------|
| C | -0.6326800 | -0.5010650 | -0.0001690 |
| C | 0.6326760  | -0.5010430 | -0.0003580 |
| C | -1.9501370 | -0.5029600 | 0.0001480  |
| H | -2.4654210 | -1.4626700 | 0.0006310  |
| C | 1.9501340  | -0.5029600 | 0.0001950  |
| H | 2.4653970  | -1.4626810 | 0.0006420  |
| C | 2.8155030  | 0.7274320  | -0.0000060 |
| H | 3.4686270  | 0.7426160  | 0.8798960  |
| H | 3.4689430  | 0.7421530  | -0.8796820 |
| H | 2.2144490  | 1.6373740  | -0.0003570 |
| C | -2.8154940 | 0.7274370  | 0.0000110  |
| H | -3.4690160 | 0.7421290  | -0.8796060 |
| H | -3.4685430 | 0.7426580  | 0.8799700  |
| H | -2.2144440 | 1.6373810  | -0.0004240 |

1,5-hexadiene (49)

|   |            |            |            |
|---|------------|------------|------------|
| C | 0.5733100  | -0.2965860 | 0.5187380  |
| H | 0.4848110  | 0.5870100  | 1.1583500  |
| H | 0.4532110  | -1.1720080 | 1.1709830  |
| C | -0.5733370 | -0.2968090 | -0.5187050 |
| H | -0.4848640 | 0.5865310  | -1.1586740 |
| H | -0.4532240 | -1.1724950 | -1.1705900 |
| C | 1.9332630  | -0.3359030 | -0.1183790 |
| H | 2.1397860  | -1.2054140 | -0.7419180 |
| C | 2.8702090  | 0.5983380  | 0.0132490  |
| H | 2.7087980  | 1.4828670  | 0.6225600  |
| H | 3.8332180  | 0.5133390  | -0.4777210 |
| C | -1.9332780 | -0.3358950 | 0.1184540  |
| H | -2.1398220 | -1.2052330 | 0.7422280  |
| C | -2.8701700 | 0.5983720  | -0.0133590 |
| H | -2.7087390 | 1.4827430  | -0.6228950 |
| H | -3.8331530 | 0.5135640  | 0.4776940  |

1,5-hexadiyne (50)

|   |            |            |            |
|---|------------|------------|------------|
| C | 0.4821330  | 0.6076540  | 0.0000000  |
| H | 0.2757320  | 1.2284500  | -0.8772100 |
| H | 0.2757320  | 1.2284500  | 0.8772100  |
| C | -0.4821330 | -0.6076540 | 0.0000000  |
| H | -0.2757320 | -1.2284500 | -0.8772100 |
| H | -0.2757320 | -1.2284500 | 0.8772100  |
| C | 1.8839890  | 0.2026710  | 0.0000000  |
| C | 3.0316080  | -0.1527310 | -0.0000010 |
| H | 4.0484670  | -0.4600230 | -0.0000010 |
| C | -1.8839890 | -0.2026710 | 0.0000000  |
| C | -3.0316080 | 0.1527310  | 0.0000010  |
| H | -4.0484670 | 0.4600230  | 0.0000010  |

| hexa-1-ene-5-yne (51) |            |            |            |
|-----------------------|------------|------------|------------|
| C                     | 0.6321870  | 0.6126600  | -0.2577320 |
| H                     | 0.3860530  | 0.7336400  | -1.3181580 |
| H                     | 0.5788150  | 1.6132040  | 0.1869740  |
| C                     | -0.4234790 | -0.3051030 | 0.4080550  |
| H                     | -0.3834490 | -1.2950760 | -0.0539920 |
| H                     | -0.1491790 | -0.4325090 | 1.4614820  |
| C                     | 1.9935070  | 0.1014290  | -0.1287180 |
| C                     | 3.1045190  | -0.3412580 | -0.0118600 |
| H                     | 4.0899100  | -0.7249220 | 0.0879040  |
| C                     | -1.8115710 | 0.2602490  | 0.3070000  |
| H                     | -1.9678360 | 1.2270970  | 0.7844540  |
| C                     | -2.8315360 | -0.3231010 | -0.3150790 |
| H                     | -2.7230480 | -1.2865230 | -0.8045600 |
| H                     | -3.8130310 | 0.1358240  | -0.3541000 |

| cyclopentadiene (52) |            |            |            |
|----------------------|------------|------------|------------|
| C                    | 0.0000000  | 1.1795220  | 0.2809340  |
| C                    | 0.0000000  | -1.1795220 | 0.2809340  |
| C                    | 0.0000000  | 0.7341730  | -0.9889490 |
| C                    | 0.0000000  | -0.7341730 | -0.9889490 |
| H                    | 0.0000000  | 2.2101160  | 0.6081660  |
| H                    | 0.0000000  | -2.2101160 | 0.6081660  |
| H                    | 0.0000000  | 1.3463450  | -1.8817540 |
| H                    | 0.0000000  | -1.3463450 | -1.8817540 |
| C                    | 0.0000000  | 0.0000000  | 1.2149490  |
| H                    | 0.8768940  | 0.0000000  | 1.8768270  |
| H                    | -0.8768940 | 0.0000000  | 1.8768270  |

| 2-ethyl-1-butene (53) |            |            |            |
|-----------------------|------------|------------|------------|
| C                     | -2.3811860 | -0.5220040 | -0.1568520 |
| H                     | -2.4679400 | -0.1787980 | -1.1912170 |
| H                     | -2.8474120 | 0.2292860  | 0.4860710  |
| C                     | -0.9225500 | -0.7647340 | 0.2318200  |
| H                     | -0.8806400 | -1.1635550 | 1.2548350  |
| H                     | -0.5130780 | -1.5645070 | -0.3979990 |
| C                     | 1.4487930  | 0.1576910  | 0.5536170  |
| H                     | 1.9609700  | 1.1114370  | 0.7093610  |
| H                     | 1.4684340  | -0.3685990 | 1.5166730  |
| C                     | 0.0088170  | 0.4281280  | 0.1642500  |
| C                     | -0.3842720 | 1.6482130  | -0.2050620 |
| H                     | -1.4036810 | 1.8692980  | -0.4970830 |
| H                     | 0.3145330  | 2.4780900  | -0.2260670 |
| H                     | -2.9590990 | -1.4449310 | -0.0632740 |
| C                     | 2.2329910  | -0.6694110 | -0.4807400 |
| H                     | 3.2658040  | -0.8170430 | -0.1533580 |
| H                     | 1.7924300  | -1.6580490 | -0.6323530 |
| H                     | 2.2541170  | -0.1599260 | -1.4477890 |

| 2-methyl-1-pentene (54) |            |            |            |
|-------------------------|------------|------------|------------|
| C                       | 2.7775800  | -0.2819270 | 0.0000630  |
| H                       | 2.8854250  | -0.9197860 | -0.8828150 |
| H                       | 2.8854370  | -0.9194560 | 0.8831790  |
| H                       | 3.6100750  | 0.4266810  | -0.0000740 |
| C                       | 1.4293760  | 0.4448290  | -0.0000620 |
| H                       | 1.3678590  | 1.0983840  | 0.8767210  |
| H                       | 1.3678360  | 1.0980600  | -0.8770860 |
| C                       | 0.2418450  | -0.5202800 | 0.0001320  |
| H                       | 0.3211960  | -1.1879020 | -0.8702090 |
| H                       | 0.3211720  | -1.1875250 | 0.8707660  |
| C                       | -2.2709690 | -0.9185920 | 0.0000350  |
| H                       | -2.2145830 | -1.5715290 | 0.8788090  |
| H                       | -3.2476550 | -0.4314070 | -0.0000650 |
| H                       | -2.2144930 | -1.5717090 | -0.8786000 |
| C                       | -1.1451830 | 0.0859730  | -0.0000080 |
| C                       | -1.3824470 | 1.3982600  | -0.0001780 |
| H                       | -0.5868880 | 2.1332580  | -0.0002390 |
| H                       | -2.3965960 | 1.7833520  | -0.0002840 |

| 2-methyl-2-pentene (55) |            |            |            |
|-------------------------|------------|------------|------------|
| C                       | 2.6001880  | -0.1816500 | 0.4948630  |
| H                       | 2.7975750  | -1.2575830 | 0.4705640  |
| H                       | 2.2804190  | 0.0730620  | 1.5088380  |
| C                       | 1.5247590  | 0.2077350  | -0.5340450 |
| H                       | 1.3697650  | 1.2887670  | -0.5058570 |
| H                       | 1.9049000  | -0.0186240 | -1.5389520 |
| H                       | 3.5431840  | 0.3350240  | 0.2948150  |
| C                       | 0.2326090  | -0.5339870 | -0.3273630 |
| C                       | -0.9802690 | -0.0451920 | -0.0423880 |
| C                       | -2.1626970 | -0.9667820 | 0.1362050  |
| H                       | -2.6049290 | -0.8511590 | 1.1330710  |
| H                       | -2.9554190 | -0.7337230 | -0.5849410 |
| H                       | -1.8839090 | -2.0144400 | 0.0074960  |
| H                       | 0.3213230  | -1.6171310 | -0.4148160 |
| C                       | -1.3044230 | 1.4183920  | 0.1246520  |
| H                       | -1.7366250 | 1.6045290  | 1.1148620  |
| H                       | -0.4381320 | 2.0691420  | 0.0101000  |
| H                       | -2.0591490 | 1.7310410  | -0.6067230 |



## 2-methylpentane (56)

|   |            |            |            |
|---|------------|------------|------------|
| C | 2.8452150  | -0.2116330 | 0.1505850  |
| H | 2.9959950  | -1.2264020 | -0.2310360 |
| H | 2.9048560  | -0.2583450 | 1.2425270  |
| H | 3.6789350  | 0.4024250  | -0.2009630 |
| C | 1.4984380  | 0.3579590  | -0.3060200 |
| H | 1.4031510  | 1.3863680  | 0.0577180  |
| H | 1.4811650  | 0.4181660  | -1.4013450 |
| C | 0.3049680  | -0.4796490 | 0.1696290  |
| H | 0.2933080  | -0.5040070 | 1.2682710  |
| H | 0.4585070  | -1.5173110 | -0.1531720 |
| C | -1.0744810 | -0.0130030 | -0.3327350 |
| H | -1.0249650 | 0.0447230  | -1.4290270 |
| C | -2.1562670 | -1.0392810 | 0.0322700  |
| H | -2.2485450 | -1.1388620 | 1.1194030  |
| H | -3.1343820 | -0.7416260 | -0.3569540 |
| H | -1.9209510 | -2.0278600 | -0.3729600 |
| C | -1.4536820 | 1.3784380  | 0.1950900  |
| H | -1.4869490 | 1.3816340  | 1.2904840  |
| H | -0.7433090 | 2.1466700  | -0.1194310 |
| H | -2.4419550 | 1.6774400  | -0.1664270 |

## 3-methylpentane (57)

|   |            |            |            |
|---|------------|------------|------------|
| C | -2.5846000 | -0.1722880 | -0.2904960 |
| H | -2.5688100 | -0.2063800 | -1.3847080 |
| H | -2.7985940 | 0.8574000  | 0.0064080  |
| H | -3.4227240 | -0.7884490 | 0.0466510  |
| C | -1.2634680 | -0.6810400 | 0.2962920  |
| H | -1.3020720 | -0.6201200 | 1.3918440  |
| H | -1.1607300 | -1.7458920 | 0.0567420  |
| C | -0.0000030 | 0.0510050  | -0.1986850 |
| H | -0.0000220 | 0.0010740  | -1.2977190 |
| C | 1.2634450  | -0.6810930 | 0.2962400  |
| H | 1.1606910  | -1.7459220 | 0.0565930  |
| C | 2.5845870  | -0.1722960 | -0.2904770 |
| H | 2.7985800  | 0.8573620  | 0.0065340  |
| H | 3.4226980  | -0.7885000 | 0.0466250  |
| H | 2.5688170  | -0.2062790 | -1.3846930 |
| H | 1.3020360  | -0.6202700 | 1.3917980  |
| C | 0.0000370  | 1.5322390  | 0.2068610  |
| H | -0.8784830 | 2.0562510  | -0.1762670 |
| H | 0.0001090  | 1.6343220  | 1.2981640  |
| H | 0.8785150  | 2.0562390  | -0.1763820 |

## E-3-methyl-2-pentene (58)

|   |            |            |            |
|---|------------|------------|------------|
| C | -2.3532200 | -0.3442140 | 0.5449990  |
| H | -2.5593010 | 0.6995420  | 0.7954240  |
| H | -2.0103070 | -0.8460450 | 1.4541120  |
| C | -1.3062710 | -0.4702910 | -0.5755490 |
| H | -1.1919920 | -1.5257770 | -0.8396850 |
| H | -1.6888650 | 0.0356030  | -1.4722510 |
| H | -3.2995710 | -0.8014620 | 0.2429240  |
| C | 0.0968860  | 1.6020630  | -0.0511420 |
| H | -0.3201790 | 2.1013330  | -0.9335400 |
| H | -0.5088480 | 1.9212990  | 0.8038620  |
| H | 1.1058290  | 1.9839500  | 0.1016660  |
| C | 0.0527530  | 0.1034190  | -0.2253260 |
| C | 1.1116170  | -0.7052450 | -0.0957140 |
| H | 0.9424040  | -1.7691220 | -0.2579030 |
| C | 2.5295260  | -0.3493280 | 0.2493590  |
| H | 2.8437520  | -0.8573430 | 1.1685540  |
| H | 3.2158830  | -0.6807480 | -0.5384350 |
| H | 2.6834550  | 0.7203480  | 0.3955100  |

## Z-3-methyl-2-pentene (59)

|   |            |            |            |
|---|------------|------------|------------|
| C | 1.6963370  | -1.2850160 | -0.4381590 |
| H | 2.3714390  | -0.5755470 | -0.9239960 |
| H | 1.0600160  | -1.7209990 | -1.2127050 |
| C | 0.8458150  | -0.6049330 | 0.6504420  |
| H | 0.2140590  | -1.3564590 | 1.1292530  |
| H | 1.5126470  | -0.2249430 | 1.4340740  |
| H | 2.3082630  | -2.0848790 | -0.0115970 |
| C | 0.7480760  | 1.8448760  | -0.0678190 |
| H | 1.1504060  | 2.2131160  | 0.8836090  |
| H | 1.6034320  | 1.7220500  | -0.7417430 |
| H | 0.1013730  | 2.6192120  | -0.4852620 |
| C | 0.0064570  | 0.5438560  | 0.1290960  |
| C | -1.2976360 | 0.4520460  | -0.1578250 |
| H | -1.7889160 | 1.3484370  | -0.5341420 |
| C | -2.1959800 | -0.7455740 | -0.0340740 |
| H | -3.0444630 | -0.5306650 | 0.6258810  |
| H | -2.6212970 | -1.0134280 | -1.0082510 |
| H | -1.6853760 | -1.6274200 | 0.3549190  |

2-methylpropene (60)

|   |            |            |            |
|---|------------|------------|------------|
| C | 0.0000000  | 1.2760720  | -0.6781250 |
| H | 0.8785880  | 1.3270510  | -1.3317800 |
| H | -0.8785880 | 1.3270510  | -1.3317800 |
| H | 0.0000000  | 2.1586540  | -0.0360830 |
| C | 0.0000000  | 0.0000000  | 0.1239730  |
| C | 0.0000000  | 0.0000000  | 1.4569370  |
| H | 0.0000000  | -0.9238350 | 2.0256620  |
| H | 0.0000000  | 0.9238350  | 2.0256620  |
| C | 0.0000000  | -1.2760720 | -0.6781250 |
| H | -0.8785880 | -1.3270510 | -1.3317800 |
| H | 0.8785880  | -1.3270510 | -1.3317800 |
| H | 0.0000000  | -2.1586540 | -0.0360830 |

2-methyl-1-butene (61)

|   |            |            |            |
|---|------------|------------|------------|
| C | -2.0460390 | -0.0375450 | 0.0000200  |
| H | -2.1638370 | 0.5949670  | 0.8838020  |
| H | -2.1638550 | 0.5949530  | -0.8837700 |
| H | -2.8623270 | -0.7642570 | 0.0000340  |
| C | -0.6951410 | -0.7525980 | 0.0000120  |
| H | -0.6370020 | -1.4210010 | 0.8701000  |
| H | -0.6370210 | -1.4210160 | -0.8700650 |
| C | 0.5410760  | 0.1211070  | -0.0000100 |
| C | 0.5061540  | 1.4540070  | -0.0000470 |
| H | -0.4227500 | 2.0111530  | -0.0000590 |
| H | 1.4199680  | 2.0385870  | -0.0000710 |
| C | 1.8466000  | -0.6351160 | 0.0000150  |
| H | 1.9231490  | -1.2858150 | 0.8788690  |
| H | 1.9230790  | -1.2860100 | -0.8786990 |
| H | 2.7046950  | 0.0393130  | -0.0000910 |

2-methyl-2-butene (62)

|   |            |            |            |
|---|------------|------------|------------|
| C | 0.6253880  | 1.4564900  | -0.0000110 |
| H | 1.1990400  | 1.7761330  | -0.8780400 |
| H | 1.1989700  | 1.7761490  | 0.8780580  |
| H | -0.3170500 | 2.0030780  | -0.0000500 |
| C | 0.4483340  | -0.0409190 | -0.0000030 |
| C | -0.7314340 | -0.6719850 | 0.0000010  |
| H | -0.7086380 | -1.7608540 | 0.0000150  |
| C | -2.1111700 | -0.0788960 | 0.0000030  |
| H | -2.6773520 | -0.4114030 | -0.8777440 |
| H | -2.6772300 | -0.4111050 | 0.8779450  |
| H | -2.1116500 | 1.0115750  | -0.0001800 |
| C | 1.7406910  | -0.8206760 | 0.0000050  |
| H | 2.3492350  | -0.5747840 | -0.8786350 |
| H | 2.3492400  | -0.5747600 | 0.8786350  |
| H | 1.5645780  | -1.8981100 | 0.0000210  |

isobutane (63)

|   |            |            |            |
|---|------------|------------|------------|
| C | 0.0000000  | 0.0000000  | 0.3718180  |
| H | 0.0000000  | 0.0000000  | 1.4698600  |
| C | 0.0000000  | 1.4611630  | -0.0956940 |
| H | 0.0000000  | 1.5198980  | -1.1898300 |
| H | -0.8840930 | 1.9951230  | 0.2652020  |
| H | 0.8840930  | 1.9951230  | 0.2652020  |
| C | -1.2654040 | -0.7305810 | -0.0956940 |
| H | -1.3162700 | -0.7599490 | -1.1898300 |
| H | -1.2857800 | -1.7632090 | 0.2652020  |
| H | -2.1698730 | -0.2319140 | 0.2652020  |
| C | 1.2654040  | -0.7305810 | -0.0956940 |
| H | 2.1698730  | -0.2319140 | 0.2652020  |
| H | 1.2857800  | -1.7632090 | 0.2652020  |
| H | 1.3162700  | -0.7599490 | -1.1898300 |

isopentane (64)

|   |            |            |            |
|---|------------|------------|------------|
| C | 1.7389670  | -0.8248350 | -0.0124840 |
| H | 1.9200660  | -0.8604440 | 1.0675550  |
| H | 1.6419600  | -1.8551690 | -0.3672840 |
| H | 2.6264440  | -0.3909900 | -0.4825000 |
| C | 0.4817950  | -0.0028100 | -0.3284950 |
| H | 0.3456500  | -0.0038480 | -1.4190960 |
| C | -0.7652370 | -0.6598910 | 0.2934680  |
| H | -0.7730170 | -1.7198150 | 0.0131260  |
| H | -0.6681320 | -0.6370270 | 1.3869490  |
| C | -2.1015970 | -0.0322550 | -0.1158620 |
| H | -2.2204080 | -0.0332740 | -1.2042870 |
| H | -2.9410360 | -0.5903840 | 0.3078730  |
| H | -2.1924730 | 1.0016970  | 0.2266550  |
| C | 0.6641160  | 1.4536940  | 0.1214840  |
| H | -0.1859600 | 2.0811410  | -0.1570380 |
| H | 0.7803800  | 1.5115860  | 1.2096800  |
| H | 1.5582670  | 1.8931130  | -0.3302980 |

H<sub>2</sub> (65)

|   |           |           |            |
|---|-----------|-----------|------------|
| H | 0.0000000 | 0.0000000 | 0.3720630  |
| H | 0.0000000 | 0.0000000 | -0.3720630 |

## MP2(full)/6-31G(d) Optimized Structures (G3)

### 1,3-cyclohexadiene (1)

|   |            |            |            |
|---|------------|------------|------------|
| C | -1.2533420 | -0.7212790 | 0.1186070  |
| C | -1.2533420 | 0.7212790  | -0.1186070 |
| C | -0.1006970 | 1.4172720  | -0.0676210 |
| C | 1.1813300  | 0.7100000  | 0.2807740  |
| C | 1.1813300  | -0.7100000 | -0.2807740 |
| C | -0.1006970 | -1.4172720 | 0.0676210  |
| H | -2.1958300 | -1.2220010 | 0.3268760  |
| H | -2.1958300 | 1.2220010  | -0.3268760 |
| H | -0.0956520 | 2.4959480  | -0.2061070 |
| H | 2.0487960  | 1.2653910  | -0.0905700 |
| H | 1.2789430  | 0.6673560  | 1.3769450  |
| H | 1.2789430  | -0.6673560 | -1.3769450 |
| H | 2.0487960  | -1.2653910 | 0.0905710  |
| H | -0.0956520 | -2.4959480 | 0.2061070  |

### 1,3-hexadiene (2)

|   |            |            |            |
|---|------------|------------|------------|
| C | -3.1122280 | -0.1806790 | 0.2716360  |
| C | -1.9466020 | 0.4094410  | -0.0401530 |
| C | -0.6724620 | -0.2889510 | -0.0946500 |
| C | 0.4946040  | 0.3013570  | -0.4099620 |
| C | 1.8193510  | -0.3922610 | -0.4498440 |
| C | 2.7955760  | 0.1777510  | 0.5818040  |
| H | -4.0429640 | 0.3748930  | 0.3019210  |
| H | -3.1659300 | -1.2401240 | 0.5057890  |
| H | -1.9316050 | 1.4748970  | -0.2696200 |
| H | -0.6847400 | -1.3557690 | 0.1349820  |
| H | 0.4980710  | 1.3699430  | -0.6354750 |
| H | 1.6749870  | -1.4643680 | -0.2739230 |
| H | 2.2575560  | -0.2934040 | -1.4514720 |
| H | 3.7657080  | -0.3243830 | 0.5267180  |
| H | 2.9591900  | 1.2463330  | 0.4150780  |
| H | 2.4002900  | 0.0520290  | 1.5930150  |

### 1,3-hexadiyne (3)

|   |            |            |            |
|---|------------|------------|------------|
| C | 3.3530920  | 0.2499350  | 0.0000100  |
| C | 2.1467470  | 0.0412240  | -0.0000020 |
| C | 0.7943250  | -0.1843760 | -0.0000130 |
| C | -0.4125650 | -0.4054170 | -0.0000230 |
| C | -1.8592100 | -0.6077150 | -0.0000320 |
| C | -2.6316190 | 0.7147970  | 0.0000460  |
| H | 4.4059230  | 0.4200140  | 0.0000160  |
| H | -2.1371320 | -1.2025150 | -0.8778290 |
| H | -2.1371280 | -1.2026170 | 0.8776970  |
| H | -3.7083190 | 0.5249030  | 0.0000360  |
| H | -2.3839820 | 1.3047100  | 0.8848200  |
| H | -2.3839840 | 1.3048120  | -0.8846600 |

### 1,4-hexadiene (5)

|   |            |            |            |
|---|------------|------------|------------|
| C | -2.9516140 | -0.4567530 | -0.1118590 |
| C | -1.7955690 | -0.1218990 | 0.4707550  |
| C | -0.7583040 | 0.7725050  | -0.1475730 |
| C | 0.5249750  | 0.0281760  | -0.3849960 |
| C | 1.6895320  | 0.3090750  | 0.2134240  |
| C | 2.9639390  | -0.4458000 | -0.0054910 |
| H | -3.6623810 | -1.1208780 | 0.3685140  |
| H | -3.2253020 | -0.0729740 | -1.0907270 |
| H | -1.5491260 | -0.5298600 | 1.4507070  |
| H | -1.1471900 | 1.1724430  | -1.0931090 |
| H | -0.5609780 | 1.6300850  | 0.5087320  |
| H | 0.4703380  | -0.8105460 | -1.0806330 |
| H | 1.7311530  | 1.1462040  | 0.9116310  |
| H | 2.8180320  | -1.2617170 | -0.7182460 |
| H | 3.7510420  | 0.2094020  | -0.3935560 |
| H | 3.3366630  | -0.8739800 | 0.9311190  |

### 1,4-hexadiyne (6)

|   |            |            |            |
|---|------------|------------|------------|
| C | -2.8373700 | -0.8889790 | -0.0000020 |
| C | -1.9477410 | -0.0563930 | 0.0000290  |
| C | -0.9188840 | 0.9896460  | 0.0000640  |
| C | 0.4429260  | 0.4450130  | -0.0001060 |
| C | 1.5951050  | 0.0438800  | -0.0001770 |
| C | 2.9562070  | -0.4875570 | 0.0000870  |
| H | -3.5837680 | -1.6501290 | -0.0000290 |
| H | -1.0583830 | 1.6339480  | 0.8773900  |
| H | -1.0585210 | 1.6340800  | -0.8771430 |
| H | 2.9457450  | -1.5809210 | -0.0048150 |
| H | 3.5084230  | -0.1513990 | -0.8817740 |
| H | 3.5050450  | -0.1592400 | 0.8869950  |

### 2-butene (7)

|   |            |            |            |
|---|------------|------------|------------|
| C | 1.9556370  | -0.0791800 | 0.0000150  |
| C | 0.5367640  | 0.3996850  | 0.0000480  |
| C | -0.5367640 | -0.3996850 | -0.0000500 |
| C | -1.9556370 | 0.0791800  | -0.0000130 |
| H | 2.4971450  | 0.2831740  | -0.8803080 |
| H | 2.4971130  | 0.2829560  | 0.8804470  |
| H | 1.9998540  | -1.1716310 | -0.0001200 |
| H | 0.3859940  | 1.4799680  | 0.0001620  |
| H | -0.3859940 | -1.4799680 | -0.0001660 |
| H | -1.9998540 | 1.1716310  | 0.0000660  |
| H | -2.4971310 | -0.2830010 | -0.8804150 |
| H | -2.4971270 | -0.2831290 | 0.8803390  |

2-pentene (8)

|   |            |            |            |
|---|------------|------------|------------|
| C | -2.3091140 | -0.4773130 | 0.2688100  |
| C | -1.3014260 | 0.5693800  | -0.2096340 |
| C | 0.0597320  | -0.0177640 | -0.4257030 |
| C | 1.1597970  | 0.3316780  | 0.2531750  |
| C | 2.5156740  | -0.2708030 | 0.0504820  |
| H | -3.3025000 | -0.0395470 | 0.4030020  |
| H | -2.3960240 | -1.2938750 | -0.4539340 |
| H | -1.9910950 | -0.9063020 | 1.2225830  |
| H | -1.2343740 | 1.3829160  | 0.5217980  |
| H | -1.6640610 | 1.0163490  | -1.1442400 |
| H | 0.1344860  | -0.8009320 | -1.1831130 |
| H | 1.0807260  | 1.1121530  | 1.0111830  |
| H | 2.4898070  | -1.0405550 | -0.7254720 |
| H | 3.2469910  | 0.4881660  | -0.2473080 |
| H | 2.8880700  | -0.7294450 | 0.9727250  |

2-pentyne (9)

|   |            |            |            |
|---|------------|------------|------------|
| C | -2.6540630 | 0.2252620  | 0.0000190  |
| C | -1.2250520 | -0.0822980 | -0.0000500 |
| C | -0.0345180 | -0.3534960 | 0.0000070  |
| C | 1.4011190  | -0.6392980 | 0.0000080  |
| C | 2.2500860  | 0.6344550  | 0.0000010  |
| H | -2.8227850 | 1.3058100  | -0.0110810 |
| H | -3.1473790 | -0.2001180 | -0.8784900 |
| H | -3.1432790 | -0.1813330 | 0.8896450  |
| H | 1.6508820  | -1.2481740 | 0.8767550  |
| H | 1.6508830  | -1.2481770 | -0.8767360 |
| H | 3.3153720  | 0.3870090  | 0.0000020  |
| H | 2.0354340  | 1.2386130  | -0.8841920 |
| H | 2.0354330  | 1.2386230  | 0.8841870  |

hexa-1-ene-3-yne (10)

|   |            |            |            |
|---|------------|------------|------------|
| C | 2.9272270  | 0.6105800  | 0.2094120  |
| C | 2.1158760  | -0.3335870 | -0.2965290 |
| C | 0.7094710  | -0.3765290 | -0.0672670 |
| C | -0.5003770 | -0.4639940 | 0.1035530  |
| C | -1.9469910 | -0.5038960 | 0.3122870  |
| C | -2.6521210 | 0.7316540  | -0.2547800 |
| H | 3.9919120  | 0.5983610  | 0.0039210  |
| H | 2.5463570  | 1.4101610  | 0.8358570  |
| H | 2.5377140  | -1.1194890 | -0.9212680 |
| H | -2.3542980 | -1.4088700 | -0.1532080 |
| H | -2.1558000 | -0.5889480 | 1.3852570  |
| H | -3.7299100 | 0.6708250  | -0.0801640 |
| H | -2.2750650 | 1.6401860  | 0.2195980  |
| H | -2.4794210 | 0.8124090  | -1.3300510 |

hexa-1-ene-4-yne (11)

|   |            |            |            |
|---|------------|------------|------------|
| C | -2.8199440 | -0.6040910 | 0.2927840  |
| C | -1.7764580 | -0.1988040 | -0.4364830 |
| C | -0.8307100 | 0.8936670  | -0.0137760 |
| C | 0.5592080  | 0.4297620  | 0.0222310  |
| C | 1.7198280  | 0.0510260  | 0.0306210  |
| C | 3.1009150  | -0.4262250 | 0.0587710  |
| H | -3.4819240 | -1.3917380 | -0.0505720 |
| H | -3.0442760 | -0.1621040 | 1.2592710  |
| H | -1.5680390 | -0.6660300 | -1.3973500 |
| H | -0.9100920 | 1.7404660  | -0.7091040 |
| H | -1.1265890 | 1.2712010  | 0.9725940  |
| H | 3.1421950  | -1.5119430 | -0.0658910 |
| H | 3.6901600  | 0.0270480  | -0.7433160 |
| H | 3.5815380  | -0.1789110 | 1.0094830  |

hexa-1-yne-3-ene (12)

|   |            |            |            |
|---|------------|------------|------------|
| C | 3.2144050  | -0.3708320 | -0.0002890 |
| C | 2.0629910  | 0.0252210  | -0.1034050 |
| C | 0.7325810  | 0.5159100  | -0.2473780 |
| C | -0.3224920 | 0.0108460  | 0.4181520  |
| C | -1.7256550 | 0.5017610  | 0.2585870  |
| C | -2.6514380 | -0.5855940 | -0.2919780 |
| H | 4.2117590  | -0.7333920 | 0.1027770  |
| H | 0.5822560  | 1.3459900  | -0.9372190 |
| H | -0.1613380 | -0.8215090 | 1.1039230  |
| H | -2.1068030 | 0.8412440  | 1.2302140  |
| H | -1.7337830 | 1.3729720  | -0.4062560 |
| H | -3.6776950 | -0.2186450 | -0.3813150 |
| H | -2.3153980 | -0.9109910 | -1.2797080 |
| H | -2.6613520 | -1.4595330 | 0.3654580  |

hexa-1-yne-4-ene (13)

|   |            |            |            |
|---|------------|------------|------------|
| C | 2.9386280  | -0.7512520 | -0.1349650 |
| C | 1.9814410  | -0.0012640 | -0.0453350 |
| C | 0.8367500  | 0.9050430  | 0.0829670  |
| C | -0.4305530 | 0.1653150  | 0.4177780  |
| C | -1.5396860 | 0.2084340  | -0.3292760 |
| C | -2.8091110 | -0.5164120 | -0.0067520 |
| H | 3.7603210  | -1.4243290 | -0.2252030 |
| H | 1.0562190  | 1.6468710  | 0.8625030  |
| H | 0.7007860  | 1.4636970  | -0.8507320 |
| H | -0.4115980 | -0.4345690 | 1.3273650  |
| H | -1.5355220 | 0.8059360  | -1.2416030 |
| H | -2.7106140 | -1.0859260 | 0.9209510  |
| H | -3.6450170 | 0.1815930  | 0.1078830  |
| H | -3.0793880 | -1.2124510 | -0.8076610 |

propane (14)

|   |            |            |            |
|---|------------|------------|------------|
| C | 0.0000000  | 1.2667270  | -0.2601730 |
| C | 0.0000000  | -1.2667270 | -0.2601730 |
| C | 0.0000000  | 0.0000000  | 0.5879680  |
| H | 0.0000000  | 2.1665070  | 0.3612660  |
| H | 0.0000000  | -2.1665070 | 0.3612660  |
| H | -0.8834890 | 1.3033550  | -0.9046490 |
| H | 0.8834890  | 1.3033550  | -0.9046490 |
| H | 0.8834890  | -1.3033550 | -0.9046490 |
| H | -0.8834890 | -1.3033550 | -0.9046490 |
| H | -0.8767380 | 0.0000000  | 1.2451650  |
| H | 0.8767380  | 0.0000000  | 1.2451650  |

propene (15)

|   |            |            |            |
|---|------------|------------|------------|
| C | 1.2911060  | 0.1336650  | 0.0000000  |
| C | 0.0000000  | 0.4793900  | 0.0000000  |
| C | -1.1396130 | -0.4921960 | 0.0000000  |
| H | 2.0808660  | 0.8771150  | 0.0000000  |
| H | 1.5998950  | -0.9078490 | 0.0000000  |
| H | -0.2630070 | 1.5364360  | 0.0000000  |
| H | -0.7752400 | -1.5227640 | 0.0000000  |
| H | -1.7757350 | -0.3540460 | 0.8803980  |
| H | -1.7757350 | -0.3540460 | -0.8803980 |

propyne (16)

|   |            |            |            |
|---|------------|------------|------------|
| C | 0.0000000  | 0.0000000  | 0.2147970  |
| C | 0.0000000  | 0.0000000  | 1.4328260  |
| C | 0.0000000  | 0.0000000  | -1.2460720 |
| H | 0.0000000  | 1.0214050  | -1.6360520 |
| H | -0.8845630 | -0.5107030 | -1.6360520 |
| H | 0.8845630  | -0.5107030 | -1.6360520 |
| H | 0.0000000  | 0.0000000  | 2.4988550  |

ethane (17)

|   |            |            |            |
|---|------------|------------|------------|
| C | 0.0000000  | 0.7621890  | 0.0000000  |
| C | 0.0000000  | -0.7621890 | 0.0000000  |
| H | -0.5093450 | 1.1572660  | 0.8822110  |
| H | 0.5093450  | -1.1572660 | -0.8822110 |
| H | -0.5093450 | 1.1572660  | -0.8822110 |
| H | 0.5093450  | -1.1572660 | 0.8822110  |
| H | 1.0186900  | 1.1572650  | 0.0000000  |
| H | -1.0186900 | -1.1572650 | 0.0000000  |

1,3-butadiene (18)

|   |            |            |           |
|---|------------|------------|-----------|
| C | 0.6055440  | 1.7465860  | 0.0000000 |
| C | 0.6055440  | 0.4041970  | 0.0000000 |
| H | -0.3216100 | 2.3128130  | 0.0000000 |
| H | 1.5273900  | 2.3176620  | 0.0000000 |
| H | 1.5533520  | -0.1336480 | 0.0000000 |
| C | -0.6055440 | -0.4041970 | 0.0000000 |
| C | -0.6055440 | -1.7465860 | 0.0000000 |
| H | -1.5533520 | 0.1336480  | 0.0000000 |
| H | -1.5273900 | -2.3176620 | 0.0000000 |
| H | 0.3216100  | -2.3128130 | 0.0000000 |

1,3-butadiyne (19)

|   |           |           |            |
|---|-----------|-----------|------------|
| H | 0.0000000 | 0.0000000 | 2.9763810  |
| C | 0.0000000 | 0.0000000 | 1.9095120  |
| C | 0.0000000 | 0.0000000 | 0.6863680  |
| C | 0.0000000 | 0.0000000 | -0.6863680 |
| C | 0.0000000 | 0.0000000 | -1.9095120 |
| H | 0.0000000 | 0.0000000 | -2.9763810 |

allene (20)

|   |            |            |            |
|---|------------|------------|------------|
| C | 0.0000000  | 0.0000000  | 1.3111320  |
| C | 0.0000000  | 0.0000000  | 0.0000000  |
| C | 0.0000000  | 0.0000000  | -1.3111320 |
| H | -0.9267800 | 0.0000000  | -1.8766750 |
| H | 0.9267800  | 0.0000000  | -1.8766750 |
| H | 0.0000000  | 0.9267800  | 1.8766750  |
| H | 0.0000000  | -0.9267800 | 1.8766750  |

butatriene (21)

|   |           |            |            |
|---|-----------|------------|------------|
| C | 0.0000000 | 0.0000000  | 0.6371320  |
| C | 0.0000000 | 0.0000000  | -0.6371320 |
| C | 0.0000000 | 0.0000000  | 1.9591780  |
| C | 0.0000000 | 0.0000000  | -1.9591780 |
| H | 0.0000000 | 0.9263470  | -2.5273580 |
| H | 0.0000000 | -0.9263470 | -2.5273580 |
| H | 0.0000000 | 0.9263470  | 2.5273580  |
| H | 0.0000000 | -0.9263470 | 2.5273580  |

ethene (22)

|   |           |            |            |
|---|-----------|------------|------------|
| C | 0.0000000 | 0.0000000  | 0.6674320  |
| C | 0.0000000 | 0.0000000  | -0.6674320 |
| H | 0.0000000 | 0.9229600  | -1.2375450 |
| H | 0.0000000 | -0.9229600 | -1.2375450 |
| H | 0.0000000 | -0.9229600 | 1.2375450  |
| H | 0.0000000 | 0.9229600  | 1.2375450  |

## vinylacetylene (23)

|   |            |            |           |
|---|------------|------------|-----------|
| C | -0.4698860 | 1.8672890  | 0.0000000 |
| C | 0.0000000  | 0.7397030  | 0.0000000 |
| H | -0.9069030 | 2.8399430  | 0.0000000 |
| C | 0.5942520  | -0.5578250 | 0.0000000 |
| H | 1.6815990  | -0.6003080 | 0.0000000 |
| C | -0.1164460 | -1.6971850 | 0.0000000 |
| H | 0.3789470  | -2.6616480 | 0.0000000 |
| H | -1.2011620 | -1.6898800 | 0.0000000 |

## methane (24)

|   |            |            |            |
|---|------------|------------|------------|
| C | 0.0000000  | 0.0000000  | 0.0000000  |
| H | -1.0529870 | 0.2794680  | 0.0000000  |
| H | 0.0875100  | -1.0859210 | 0.0000000  |
| H | 0.4827380  | 0.4032260  | 0.8895260  |
| H | 0.4827380  | 0.4032260  | -0.8895260 |

## butane (25)

|   |            |            |            |
|---|------------|------------|------------|
| C | -0.4214040 | 0.6355330  | 0.0000000  |
| C | 0.4214040  | -0.6355330 | 0.0000000  |
| C | 0.4214040  | 1.9060320  | 0.0000000  |
| C | -0.4214040 | -1.9060320 | 0.0000000  |
| H | -1.0794260 | 0.6300990  | 0.8772890  |
| H | -1.0794260 | 0.6300990  | -0.8772890 |
| H | 1.0794260  | -0.6300990 | 0.8772890  |
| H | 1.0794260  | -0.6300990 | -0.8772890 |
| H | 0.2046350  | -2.8022730 | 0.0000000  |
| H | -0.2046350 | 2.8022730  | 0.0000000  |
| H | -1.0651780 | -1.9468780 | -0.8833320 |
| H | -1.0651780 | -1.9468780 | 0.8833320  |
| H | 1.0651780  | 1.9468780  | -0.8833320 |
| H | 1.0651780  | 1.9468780  | 0.8833320  |

## acetylene (26)

|   |           |           |            |
|---|-----------|-----------|------------|
| H | 0.0000000 | 0.0000000 | 1.6742940  |
| C | 0.0000000 | 0.0000000 | 0.6081470  |
| C | 0.0000000 | 0.0000000 | -0.6081470 |
| H | 0.0000000 | 0.0000000 | -1.6742940 |

## hexadienyne (27)

|   |            |            |           |
|---|------------|------------|-----------|
| C | -0.1713990 | 3.0051020  | 0.0000000 |
| C | 0.1713990  | -3.0051020 | 0.0000000 |
| C | 0.6398960  | 1.9325850  | 0.0000000 |
| C | -0.6398960 | -1.9325850 | 0.0000000 |
| C | 0.1713990  | 0.5896470  | 0.0000000 |
| C | -0.1713990 | -0.5896470 | 0.0000000 |
| H | -1.2511860 | 2.9004520  | 0.0000000 |
| H | 1.2511860  | -2.9004520 | 0.0000000 |
| H | 0.2353950  | 4.0103110  | 0.0000000 |
| H | -0.2353950 | -4.0103110 | 0.0000000 |
| H | 1.7190140  | 2.0782140  | 0.0000000 |
| H | -1.7190140 | -2.0782140 | 0.0000000 |

## hexadiyneene (28)

|   |            |            |           |
|---|------------|------------|-----------|
| C | 0.5274770  | 3.0227870  | 0.0000000 |
| C | -0.5274770 | -3.0227870 | 0.0000000 |
| C | 0.5274770  | 1.8003940  | 0.0000000 |
| C | -0.5274770 | -1.8003940 | 0.0000000 |
| C | 0.5601270  | 0.3798310  | 0.0000000 |
| C | -0.5601270 | -0.3798310 | 0.0000000 |
| H | 0.5149720  | 4.0893340  | 0.0000000 |
| H | -0.5149720 | -4.0893340 | 0.0000000 |
| H | 1.5336370  | -0.1070950 | 0.0000000 |
| H | -1.5336370 | 0.1070950  | 0.0000000 |

## pentane (29)

|   |            |            |            |
|---|------------|------------|------------|
| C | 0.0000000  | 1.2745400  | -0.5242930 |
| C | 0.0000000  | -1.2745400 | -0.5242930 |
| C | 0.0000000  | 0.0000000  | 0.3132010  |
| C | 0.0000000  | 2.5404370  | 0.3256320  |
| C | 0.0000000  | -2.5404370 | 0.3256320  |
| H | 0.8776490  | 1.2726090  | -1.1823280 |
| H | -0.8776490 | 1.2726090  | -1.1823280 |
| H | 0.8776490  | -1.2726090 | -1.1823280 |
| H | -0.8776490 | -1.2726090 | -1.1823280 |
| H | 0.8783630  | 0.0000000  | 0.9726050  |
| H | -0.8783630 | 0.0000000  | 0.9726050  |
| H | 0.0000000  | -3.4407950 | -0.2952040 |
| H | 0.0000000  | 3.4407950  | -0.2952040 |
| H | -0.8836230 | -2.5769350 | 0.9698100  |
| H | 0.8836230  | -2.5769350 | 0.9698100  |
| H | -0.8836230 | 2.5769350  | 0.9698100  |
| H | 0.8836230  | 2.5769350  | 0.9698100  |

## 2-butyne (30)

|   |            |            |            |
|---|------------|------------|------------|
| C | -2.0718760 | 0.0000030  | 0.0000040  |
| C | -0.6099690 | -0.0000090 | -0.0000260 |
| H | -2.4645070 | -0.4362600 | 0.9227580  |
| H | -2.4645440 | -0.5809830 | -0.8391790 |
| H | -2.4645160 | 1.0172610  | -0.0835470 |
| H | 2.4645050  | -0.5808150 | -0.8393220 |
| C | 0.6099690  | -0.0000010 | 0.0000280  |
| H | 2.4645420  | -0.4364520 | 0.9226440  |
| C | 2.0718760  | 0.0000020  | -0.0000040 |
| H | 2.4645190  | 1.0172750  | -0.0833580 |

|               |            |            |            |
|---------------|------------|------------|------------|
| 1-butyne (31) |            |            |            |
| C             | -0.6414340 | 1.8767650  | 0.0000000  |
| C             | 0.0000000  | 0.8401410  | 0.0000000  |
| H             | -1.2004040 | 2.7846340  | 0.0000000  |
| C             | 0.7474450  | -0.4174150 | 0.0000000  |
| C             | -0.1722600 | -1.6409350 | 0.0000000  |
| H             | 1.4040340  | -0.4471350 | 0.8770870  |
| H             | 1.4040340  | -0.4471350 | -0.8770870 |
| H             | 0.4165240  | -2.5623420 | 0.0000000  |
| H             | -0.8133440 | -1.6396740 | -0.8843110 |
| H             | -0.8133440 | -1.6396740 | 0.8843110  |

|               |            |            |            |
|---------------|------------|------------|------------|
| 1-butene (32) |            |            |            |
| C             | -1.8447360 | 0.0147770  | -0.2872700 |
| H             | -0.6726020 | -1.2016850 | 0.9545810  |
| C             | -0.7140870 | -0.2892640 | 0.3586260  |
| H             | -2.7242670 | -0.6177480 | -0.2305540 |
| C             | 0.5418020  | 0.5263720  | 0.3094700  |
| C             | 1.7075540  | -0.2538050 | -0.3003400 |
| H             | 0.3593770  | 1.4388940  | -0.2692120 |
| H             | 0.8129260  | 0.8446450  | 1.3240750  |
| H             | 2.6215930  | 0.3464970  | -0.3127720 |
| H             | 1.9103870  | -1.1636810 | 0.2719890  |
| H             | 1.4761510  | -0.5478610 | -1.3273070 |
| H             | -1.9267650 | 0.9124580  | -0.8937090 |

|                |            |            |            |
|----------------|------------|------------|------------|
| 1-pentene (33) |            |            |            |
| C              | -2.4572470 | -0.2340940 | -0.3112450 |
| C              | -1.4078560 | 0.3544010  | 0.2726340  |
| C              | -0.0691850 | -0.2892040 | 0.4650300  |
| C              | 1.0404330  | 0.4346020  | -0.3015600 |
| C              | 2.4098110  | -0.1984670 | -0.0823660 |
| H              | -0.1157420 | -1.3363020 | 0.1408820  |
| H              | 0.1880510  | -0.3003460 | 1.5331230  |
| H              | -1.5036470 | 1.3829680  | 0.6221550  |
| H              | -3.4029330 | 0.2812110  | -0.4421330 |
| H              | -2.4034520 | -1.2564320 | -0.6750090 |
| H              | 0.7919780  | 0.4308160  | -1.3688530 |
| H              | 1.0655190  | 1.4867210  | 0.0070440  |
| H              | 3.1879610  | 0.3292210  | -0.6407790 |
| H              | 2.6837420  | -0.1783570 | 0.9767270  |
| H              | 2.4127840  | -1.2429240 | -0.4081170 |

|                |            |            |            |
|----------------|------------|------------|------------|
| 1-pentyne (34) |            |            |            |
| C              | 2.6442340  | -0.2437460 | 0.0000550  |
| C              | 1.4948790  | 0.1632440  | -0.0000600 |
| C              | 0.1088560  | 0.6295930  | 0.0000120  |
| C              | -0.9009850 | -0.5233270 | 0.0000050  |
| C              | -2.3390230 | -0.0191780 | -0.0000040 |
| H              | -0.0638210 | 1.2644120  | -0.8779030 |
| H              | -0.0637550 | 1.2643500  | 0.8779840  |
| H              | 3.6492030  | -0.5993710 | -0.0001220 |

|   |            |            |            |
|---|------------|------------|------------|
| H | -0.7206820 | -1.1521700 | -0.8779230 |
| H | -0.7206930 | -1.1521730 | 0.8779320  |
| H | -3.0488620 | -0.8506030 | 0.0000350  |
| H | -2.5395660 | 0.5930510  | 0.8842800  |
| H | -2.5395850 | 0.5929840  | -0.8843300 |

|                     |            |            |            |
|---------------------|------------|------------|------------|
| 1,3-pentadiene (35) |            |            |            |
| C                   | -1.3558860 | 0.4010790  | -0.0000120 |
| H                   | -1.3625700 | 1.4911160  | 0.0000180  |
| C                   | -2.5223950 | -0.2643200 | -0.0000510 |
| H                   | -3.4749510 | 0.2539050  | -0.0000530 |
| H                   | -2.5552480 | -1.3502060 | -0.0000810 |
| C                   | -0.0527130 | -0.2442160 | -0.0000070 |
| H                   | -0.0428100 | -1.3353850 | -0.0000370 |
| C                   | 1.1139750  | 0.4242850  | 0.0000310  |
| H                   | 1.0909780  | 1.5148940  | 0.0000610  |
| C                   | 2.4634310  | -0.2198700 | 0.0000350  |
| H                   | 3.0441070  | 0.0768710  | -0.8801740 |
| H                   | 3.0440900  | 0.0768460  | 0.8802650  |
| H                   | 2.3779320  | -1.3097890 | 0.0000190  |

|                     |            |            |            |
|---------------------|------------|------------|------------|
| 1,3-pentadiyne (36) |            |            |            |
| C                   | 0.0000000  | 0.0000000  | 1.5247650  |
| C                   | 0.0000000  | 0.0000000  | 2.7487470  |
| H                   | 0.0000000  | 0.0000000  | 3.8153270  |
| C                   | 0.0000000  | 0.0000000  | 0.1532250  |
| C                   | 0.0000000  | 0.0000000  | -1.0723950 |
| C                   | 0.0000000  | 0.0000000  | -2.5308590 |
| H                   | 0.0000000  | 1.0224810  | -2.9187410 |
| H                   | 0.8854940  | -0.5112400 | -2.9187410 |
| H                   | -0.8854940 | -0.5112400 | -2.9187410 |

|                     |            |            |            |
|---------------------|------------|------------|------------|
| 1,4-pentadiene (37) |            |            |            |
| C                   | 0.0000000  | 0.6828980  | -0.0000030 |
| H                   | -0.3288670 | 1.3342010  | 0.8199200  |
| H                   | 0.3288670  | 1.3341930  | -0.8199330 |
| C                   | -1.1555140 | -0.1678370 | -0.4465300 |
| H                   | -0.9680530 | -0.8143480 | -1.3033280 |
| C                   | -2.3516650 | -0.1931430 | 0.1504460  |
| H                   | -2.5701530 | 0.4342760  | 1.0100550  |
| H                   | -3.1513350 | -0.8369490 | -0.2001950 |
| C                   | 1.1555140  | -0.1678320 | 0.4465320  |
| H                   | 0.9680540  | -0.8143330 | 1.3033380  |
| C                   | 2.3516650  | -0.1931450 | -0.1504440 |
| H                   | 2.5701520  | 0.4342640  | -1.0100600 |
| H                   | 3.1513350  | -0.8369470 | 0.2002040  |

1,4-pentadiyne (38)

|   |            |            |            |
|---|------------|------------|------------|
| C | 0.0000000  | 1.2203750  | 0.0654110  |
| C | 0.0000000  | 2.2612450  | -0.5676560 |
| H | 0.0000000  | 3.1481780  | -1.1591970 |
| C | 0.0000000  | 0.0000000  | 0.8786620  |
| H | 0.8776610  | 0.0000000  | 1.5366820  |
| H | -0.8776610 | 0.0000000  | 1.5366820  |
| C | 0.0000000  | -1.2203750 | 0.0654110  |
| C | 0.0000000  | -2.2612450 | -0.5676560 |
| H | 0.0000000  | -3.1481780 | -1.1591970 |

penta-1-ene-3-yne (39)

|   |            |            |            |
|---|------------|------------|------------|
| C | 1.2597900  | 0.9145090  | 0.0000000  |
| H | 1.2398420  | 2.0032790  | 0.0000000  |
| C | 2.4434040  | 0.2785740  | 0.0000000  |
| H | 3.3743040  | 0.8347980  | 0.0000000  |
| H | 2.5061310  | -0.8044500 | 0.0000000  |
| C | 0.0000000  | 0.2463680  | 0.0000000  |
| C | -1.1060810 | -0.2772420 | 0.0000000  |
| C | -2.4064600 | -0.9414220 | 0.0000000  |
| H | -2.5226790 | -1.5744660 | 0.8844060  |
| H | -3.2188380 | -0.2094180 | 0.0000000  |
| H | -2.5226790 | -1.5744660 | -0.8844060 |

penta-1-ene-4-yne (40)

|   |            |            |            |
|---|------------|------------|------------|
| C | -0.0294100 | 0.7860780  | 0.0792600  |
| H | -0.1062050 | 1.5605040  | 0.8539580  |
| H | 0.2149490  | 1.3015490  | -0.8569450 |
| C | 1.0742200  | -0.1767890 | 0.4282610  |
| H | 0.9289160  | -0.7639310 | 1.3330640  |
| C | 2.1822480  | -0.3322920 | -0.3015040 |
| H | 2.3473430  | 0.2336930  | -1.2136630 |
| H | 2.9589160  | -1.0317610 | -0.0120970 |
| C | -1.3233550 | 0.1105200  | -0.0482620 |
| C | -2.4047050 | -0.4454070 | -0.1371850 |
| H | -3.3379080 | -0.9527150 | -0.2277380 |

penta-1-yne-3-ene (41)

|   |            |            |            |
|---|------------|------------|------------|
| C | 0.0848870  | 0.4897850  | -0.0000050 |
| H | -0.1399490 | 1.5559290  | 0.0000010  |
| C | -0.9246470 | -0.3993480 | -0.0000080 |
| H | -0.6855350 | -1.4619480 | -0.0000140 |
| C | 1.4607970  | 0.1171110  | -0.0000220 |
| C | 2.6486700  | -0.1690190 | 0.0000350  |
| H | 3.6797920  | -0.4402700 | -0.0000630 |
| C | -2.3696580 | -0.0185680 | 0.0000070  |
| H | -2.8823800 | -0.4207180 | -0.8802420 |
| H | -2.8823600 | -0.4206990 | 0.8802770  |
| H | -2.4898630 | 1.0679430  | -0.0000020 |

2,4-hexadiene (42)

|   |            |            |            |
|---|------------|------------|------------|
| C | -3.1789400 | 0.1407790  | -0.0000140 |
| H | -3.7455950 | -0.1823060 | -0.8802420 |
| H | -3.7455840 | -0.1824180 | 0.8801800  |
| H | -3.1451950 | 1.2336500  | 0.0000550  |
| C | -1.7999000 | -0.4379040 | -0.0000590 |
| H | -1.7241640 | -1.5261190 | -0.0001630 |
| C | -0.6670200 | 0.2872990  | 0.0000190  |
| H | -0.7346950 | 1.3766990  | 0.0001210  |
| C | 0.6670200  | -0.2872990 | -0.0000240 |
| H | 0.7346950  | -1.3766990 | -0.0001320 |
| C | 1.7999000  | 0.4379040  | 0.0000600  |
| H | 1.7241640  | 1.5261190  | 0.0001680  |
| C | 3.1789400  | -0.1407790 | 0.0000180  |
| H | 3.7455820  | 0.1822790  | 0.8802640  |
| H | 3.1451950  | -1.2336500 | -0.0000860 |
| H | 3.7455970  | 0.1824450  | -0.8801590 |

2,4-hexadiyne (43)

|   |            |            |            |
|---|------------|------------|------------|
| C | 0.0000000  | 0.0000000  | 0.6853300  |
| C | 0.0000000  | 0.0000000  | 1.9116100  |
| C | 0.0000000  | 0.0000000  | 3.3704050  |
| H | 0.0218270  | 1.0218810  | 3.7597390  |
| H | -0.8958890 | -0.4920380 | 3.7597390  |
| H | 0.8740620  | -0.5298440 | 3.7597390  |
| C | 0.0000000  | 0.0000000  | -0.6853300 |
| C | 0.0000000  | 0.0000000  | -1.9116100 |
| C | 0.0000000  | 0.0000000  | -3.3704050 |
| H | 0.8958890  | -0.4920380 | -3.7597390 |
| H | -0.8740620 | -0.5298440 | -3.7597390 |
| H | -0.0218270 | 1.0218810  | -3.7597390 |

hexa-2-ene-4-yne (44)

|   |            |            |            |
|---|------------|------------|------------|
| C | 0.7251060  | 0.5401600  | -0.0000220 |
| H | 1.0214720  | 1.5894700  | 0.0000150  |
| C | 1.6799290  | -0.4084440 | -0.0000330 |
| H | 1.3775830  | -1.4548580 | -0.0000900 |
| C | 3.1455520  | -0.1147880 | 0.0000390  |
| H | 3.6349510  | -0.5455040 | 0.8802540  |
| H | 3.6350070  | -0.5453830 | -0.8802030 |
| H | 3.3291820  | 0.9629650  | 0.0001180  |
| C | -0.6716240 | 0.2600570  | -0.0001270 |
| C | -1.8798380 | 0.0639920  | 0.0001610  |
| C | -3.3152690 | -0.2041950 | -0.0000070 |
| H | -3.8865800 | 0.7283030  | -0.0022000 |
| H | -3.6069320 | -0.7796510 | -0.8834040 |
| H | -3.6078290 | -0.7760360 | 0.8854390  |



1,2,3-hexatriene (45)

|   |            |            |            |
|---|------------|------------|------------|
| C | 0.7149370  | 0.3704850  | -0.0483300 |
| C | 1.9363250  | 0.0090340  | -0.0450560 |
| C | -0.5540290 | 0.7509560  | -0.0529040 |
| C | 3.2029990  | -0.3730020 | -0.0375270 |
| H | 3.5217250  | -1.2738310 | 0.4797950  |
| H | -0.8335630 | 1.6611340  | -0.5880020 |
| C | -1.6661650 | -0.0085410 | 0.6124710  |
| H | -2.1598360 | 0.6453040  | 1.3428840  |
| H | -1.2467830 | -0.8532690 | 1.1673180  |
| H | 3.9720520  | 0.1998720  | -0.5484150 |
| C | -2.6972490 | -0.5000330 | -0.4052900 |
| H | -3.5171560 | -1.0260200 | 0.0920440  |
| H | -3.1236380 | 0.3372760  | -0.9651650 |
| H | -2.2337050 | -1.1838590 | -1.1206350 |

1,2,3-pentatriene (46)

|   |            |            |            |
|---|------------|------------|------------|
| C | -1.3226910 | -0.0454320 | -0.0000040 |
| C | -0.0743870 | -0.2990650 | 0.0000140  |
| C | -2.6178110 | 0.2239670  | 0.0000050  |
| H | -2.9854780 | 1.2464960  | -0.0000260 |
| H | -3.3625450 | -0.5672810 | -0.0000010 |
| C | 1.2223080  | -0.5685640 | -0.0000170 |
| H | 1.5436950  | -1.6111340 | 0.0000110  |
| C | 2.3007180  | 0.4751380  | 0.0000010  |
| H | 2.9420220  | 0.3683430  | -0.8814830 |
| H | 1.8716430  | 1.4788130  | -0.0001300 |
| H | 2.9418410  | 0.3685040  | 0.8816380  |

E-2,3,4-hexatriene (47)

|   |            |            |            |
|---|------------|------------|------------|
| C | 0.6075700  | -0.1905960 | -0.0000580 |
| C | -0.6075700 | 0.1905960  | 0.0000720  |
| C | 1.8686290  | -0.5974430 | 0.0000440  |
| C | -1.8686290 | 0.5974430  | -0.0000440 |
| H | -2.0771370 | 1.6682190  | 0.0000450  |
| C | -3.0516450 | -0.3266060 | -0.0000050 |
| H | -3.6791120 | -0.1541450 | -0.8811970 |
| H | -2.7302510 | -1.3699070 | -0.0007780 |
| H | -3.6782430 | -0.1552100 | 0.8820190  |
| H | 2.0771370  | -1.6682190 | -0.0000590 |
| C | 3.0516450  | 0.3266060  | -0.0000020 |
| H | 2.7302510  | 1.3699070  | 0.0007220  |
| H | 3.6790910  | 0.1541800  | 0.8812110  |
| H | 3.6782640  | 0.1551750  | -0.8820040 |

Z-2,3,4-hexatriene (48)

|   |            |            |            |
|---|------------|------------|------------|
| C | 0.6367630  | -0.5104000 | -0.0000240 |
| C | -0.6367630 | -0.5104000 | -0.0000170 |
| C | 1.9617910  | -0.5083370 | 0.0000160  |
| H | 2.4905600  | -1.4624670 | 0.0000550  |
| C | -1.9617910 | -0.5083370 | -0.0000020 |
| H | -2.4905600 | -1.4624670 | 0.0000420  |
| C | -2.8019230 | 0.7357280  | 0.0000070  |
| H | -3.4514990 | 0.7658170  | -0.8815300 |
| H | -3.4512920 | 0.7659460  | 0.8816930  |
| H | -2.1739390 | 1.6287550  | -0.0001300 |
| C | 2.8019220  | 0.7357280  | 0.0000010  |
| H | 3.4513990  | 0.7658880  | 0.8816090  |
| H | 3.4513910  | 0.7658750  | -0.8816150 |
| H | 2.1739390  | 1.6287550  | -0.0000040 |

1,5-hexadiene (49)

|   |            |            |            |
|---|------------|------------|------------|
| C | -0.5599740 | -0.3165980 | -0.5259260 |
| H | -0.4619760 | 0.5746600  | -1.1562910 |
| H | -0.4314390 | -1.1872810 | -1.1830880 |
| C | 0.5599740  | -0.3165980 | 0.5259260  |
| H | 0.4619750  | 0.5746610  | 1.1562900  |
| H | 0.4314390  | -1.1872800 | 1.1830880  |
| C | -1.9189770 | -0.3488980 | 0.1025120  |
| H | -2.1525350 | -1.2277710 | 0.7044430  |
| C | -2.8283810 | 0.6253970  | -0.0079740 |
| H | -2.6338450 | 1.5178140  | -0.5962130 |
| H | -3.7954790 | 0.5631680  | 0.4796850  |
| C | 1.9189770  | -0.3488980 | -0.1025120 |
| H | 2.1525350  | -1.2277710 | -0.7044420 |
| C | 2.8283810  | 0.6253970  | 0.0079730  |
| H | 2.6338460  | 1.5178140  | 0.5962120  |
| H | 3.7954790  | 0.5631670  | -0.4796850 |

1,5-hexadiyne (50)

|   |            |            |            |
|---|------------|------------|------------|
| C | 0.4706500  | 0.6094680  | 0.0000000  |
| H | 0.2570940  | 1.2281870  | -0.8784820 |
| H | 0.2570940  | 1.2281860  | 0.8784820  |
| C | -0.4706500 | -0.6094680 | 0.0000000  |
| H | -0.2570940 | -1.2281860 | -0.8784820 |
| H | -0.2570940 | -1.2281870 | 0.8784820  |
| C | 1.8742170  | 0.2033510  | 0.0000000  |
| C | 3.0377440  | -0.1601840 | -0.0000010 |
| H | 4.0582450  | -0.4697460 | -0.0000010 |
| C | -1.8742170 | -0.2033510 | 0.0000000  |
| C | -3.0377440 | 0.1601840  | 0.0000010  |
| H | -4.0582450 | 0.4697460  | 0.0000010  |

hexa-1-ene-5-yne (51)

|   |            |            |            |
|---|------------|------------|------------|
| C | 0.6087300  | 0.6067470  | -0.2739260 |
| H | 0.3433910  | 0.6814990  | -1.3347250 |
| H | 0.5500320  | 1.6233180  | 0.1337710  |
| C | -0.4177920 | -0.2918990 | 0.40370840 |
| H | -0.3793780 | -1.2968090 | 0.00034370 |
| H | -0.1304190 | -0.3851620 | 1.4911170  |
| C | 1.9741490  | 0.1023140  | -0.1377200 |
| C | 3.1044600  | -0.3375220 | -0.0131070 |
| H | 4.0944250  | -0.7183370 | 0.0940590  |
| C | -1.8033370 | 0.2646760  | 0.3215970  |
| H | -1.9787630 | 1.2326970  | 0.7918900  |
| C | -2.8055720 | -0.3356640 | -0.3292330 |
| H | -2.6714230 | -1.3004260 | -0.8103660 |
| H | -3.7916850 | 0.1113090  | -0.3973590 |

cyclopentadiene (52)

|   |            |            |            |
|---|------------|------------|------------|
| C | 0.0000000  | 1.1763860  | 0.2850850  |
| C | 0.0000000  | -1.1763860 | 0.2850850  |
| C | 0.0000000  | 0.7315150  | -0.9922410 |
| C | 0.0000000  | -0.7315150 | -0.9922410 |
| H | 0.0000000  | 2.2101320  | 0.6121130  |
| H | 0.0000000  | -2.2101320 | 0.6121130  |
| H | 0.0000000  | 1.3487320  | -1.8847570 |
| H | 0.0000000  | -1.3487320 | -1.8847570 |
| C | 0.0000000  | 0.0000000  | 1.2141440  |
| H | 0.8795600  | 0.0000000  | 1.8731490  |
| H | -0.8795600 | 0.0000000  | 1.8731490  |

2-ethyl-1-butene (53)

|   |            |            |            |
|---|------------|------------|------------|
| C | -2.3635000 | -0.5182730 | -0.1357390 |
| H | -2.4678370 | -0.1440090 | -1.1573190 |
| H | -2.8035990 | 0.2175740  | 0.5420680  |
| C | -0.9031590 | -0.7786100 | 0.2092090  |
| H | -0.8388130 | -1.2127600 | 1.2168210  |
| H | -0.5092400 | -1.5525420 | -0.4619930 |
| C | 1.4453710  | 0.1711950  | 0.5532670  |
| H | 1.9543820  | 1.1324400  | 0.6842790  |
| H | 1.4739590  | -0.3356010 | 1.5270120  |
| C | 0.0104380  | 0.4212150  | 0.1619040  |
| C | -0.3961630 | 1.6438780  | -0.2089950 |
| H | -1.4156440 | 1.8570810  | -0.5094570 |
| H | 0.2942060  | 2.4823030  | -0.2197900 |
| H | -2.9446110 | -1.4408670 | -0.0557650 |
| C | 2.2117120  | -0.6675170 | -0.4728680 |
| H | 3.2575120  | -0.7853650 | -0.1747440 |
| H | 1.7830680  | -1.6669330 | -0.5791800 |
| H | 2.1884250  | -0.1826510 | -1.4526070 |

2-methyl-1-pentene (54)

|   |            |            |            |
|---|------------|------------|------------|
| C | 2.7596080  | -0.2805840 | 0.0000900  |
| H | 2.8599040  | -0.9177400 | -0.8837040 |
| H | 2.8598730  | -0.9174970 | 0.8840620  |
| H | 3.5940740  | 0.4262110  | 0.0000080  |
| C | 1.4181770  | 0.4446930  | -0.0000330 |
| H | 1.3524290  | 1.0960740  | 0.8784970  |
| H | 1.3524620  | 1.0958370  | -0.8787420 |
| C | 0.2442290  | -0.5258270 | 0.0000760  |
| H | 0.3287710  | -1.1906460 | -0.8725680 |
| H | 0.3287380  | -1.1904090 | 0.8729030  |
| C | -2.2626790 | -0.9153360 | 0.0000960  |
| H | -2.2080520 | -1.5654230 | 0.8806420  |
| H | -3.2366960 | -0.4196420 | 0.0000020  |
| H | -2.2080180 | -1.5656910 | -0.8802510 |
| C | -1.1359140 | 0.0808580  | -0.0000340 |
| C | -1.3684770 | 1.4003820  | -0.0002310 |
| H | -0.5708860 | 2.1342710  | -0.0003260 |
| H | -2.3822700 | 1.7895420  | -0.0003040 |

2-methyl-2-pentene (55)

|   |            |            |            |
|---|------------|------------|------------|
| C | 2.5326320  | -0.1429520 | 0.5460630  |
| H | 2.7105200  | -1.2177070 | 0.6452550  |
| H | 2.1481680  | 0.2216600  | 1.5022220  |
| C | 1.5317750  | 0.1420410  | -0.5765090 |
| H | 1.3809800  | 1.2210090  | -0.6675690 |
| H | 1.9604510  | -0.1895440 | -1.5308130 |
| H | 3.4943190  | 0.3421280  | 0.3539660  |
| C | 0.2323490  | -0.5704840 | -0.3520790 |
| C | -0.9670690 | -0.0421040 | -0.0495520 |
| C | -2.1630580 | -0.9283100 | 0.1666870  |
| H | -2.5782320 | -0.7870630 | 1.1715160  |
| H | -2.9627300 | -0.6861260 | -0.5431830 |
| H | -1.9083300 | -1.9844650 | 0.0471850  |
| H | 0.2949080  | -1.6585620 | -0.4181710 |
| C | -1.2506490 | 1.4265020  | 0.0998440  |
| H | -1.6554720 | 1.6346300  | 1.0969700  |
| H | -0.3685640 | 2.0517070  | -0.0419860 |
| H | -2.0119000 | 1.7441680  | -0.6221090 |

## 2-methylpentane (56)

|   |            |            |            |
|---|------------|------------|------------|
| C | 2.8208430  | -0.2229530 | 0.1401900  |
| H | 2.9625390  | -1.2124420 | -0.3047120 |
| H | 2.8726830  | -0.3360950 | 1.2272760  |
| H | 3.6576720  | 0.4085700  | -0.1714490 |
| C | 1.4819360  | 0.3755560  | -0.2790210 |
| H | 1.3883040  | 1.3804070  | 0.1459690  |
| H | 1.4581190  | 0.4961580  | -1.3695300 |
| C | 0.3009970  | -0.4881630 | 0.1545930  |
| H | 0.2782910  | -0.5479510 | 1.2524920  |
| H | 0.4677620  | -1.5133830 | -0.2035910 |
| C | -1.0671330 | -0.0150350 | -0.3408890 |
| H | -1.0240790 | 0.0404980  | -1.4382960 |
| C | -2.1467230 | -1.0251410 | 0.0394960  |
| H | -2.2232750 | -1.1098090 | 1.1290030  |
| H | -3.1263870 | -0.7219240 | -0.3428170 |
| H | -1.9196350 | -2.0183920 | -0.3599400 |
| C | -1.4261870 | 1.3698040  | 0.1914780  |
| H | -1.4295540 | 1.3662790  | 1.2873750  |
| H | -0.7209530 | 2.1350180  | -0.1419360 |
| H | -2.4238960 | 1.6686590  | -0.1449280 |

## 3-methylpentane (57)

|   |            |            |            |
|---|------------|------------|------------|
| C | -2.5668000 | -0.1531740 | -0.2795050 |
| H | -2.5452690 | -0.1500840 | -1.3738830 |
| H | -2.7724450 | 0.8660620  | 0.0552250  |
| H | -3.4076000 | -0.7777410 | 0.0357290  |
| C | -1.2536600 | -0.6864660 | 0.2857150  |
| H | -1.2780760 | -0.6407080 | 1.3829310  |
| H | -1.1620430 | -1.7485240 | 0.0256910  |
| C | 0.0000000  | 0.0418890  | -0.2078570 |
| H | 0.0000000  | -0.0030450 | -1.3081430 |
| C | 1.2536600  | -0.6864660 | 0.2857150  |
| H | 1.1620430  | -1.7485240 | 0.0256910  |
| C | 2.5668000  | -0.1531740 | -0.2795050 |
| H | 2.7724450  | 0.8660620  | 0.0552250  |
| H | 3.4076000  | -0.7777410 | 0.0357290  |
| H | 2.5452690  | -0.1500840 | -1.3738830 |
| H | 1.2780760  | -0.6407080 | 1.3829310  |
| C | 0.0000000  | 1.5102820  | 0.2099740  |
| H | -0.8795680 | 2.0378140  | -0.1667940 |
| H | 0.0000000  | 1.5920660  | 1.3031230  |
| H | 0.8795680  | 2.0378140  | -0.1667940 |

## E-3-methyl-2-pentene (58)

|   |            |            |            |
|---|------------|------------|------------|
| C | -2.3270690 | -0.3170380 | 0.5517690  |
| H | -2.5366130 | 0.7411460  | 0.7269560  |
| H | -1.9594590 | -0.7493380 | 1.4866620  |
| C | -1.2979440 | -0.5099180 | -0.5645070 |
| H | -1.1791500 | -1.5802860 | -0.7666210 |
| H | -1.6834350 | -0.0558550 | -1.4877800 |
| H | -3.2728300 | -0.8049150 | 0.2986230  |
| C | 0.0630980  | 1.5843340  | -0.0734780 |
| H | -0.5039940 | 2.0587910  | -0.8820890 |
| H | -0.4079030 | 1.8879710  | 0.8677000  |
| H | 1.0720030  | 1.9988340  | -0.0872700 |
| C | 0.0467550  | 0.0883440  | -0.2384980 |
| C | 1.1219730  | -0.7069460 | -0.0924690 |
| H | 0.9718970  | -1.7771770 | -0.2403590 |
| C | 2.5250960  | -0.3133650 | 0.2559210  |
| H | 2.8437780  | -0.8052310 | 1.1815590  |
| H | 3.2235760  | -0.6284300 | -0.5270340 |
| H | 2.6406750  | 0.7620240  | 0.3972220  |

## Z-3-methyl-2-pentene (59)

|   |            |            |            |
|---|------------|------------|------------|
| C | 1.5140550  | -1.4049490 | -0.4537980 |
| H | 2.1639220  | -0.7661510 | -1.0580520 |
| H | 0.7590940  | -1.8360710 | -1.1165330 |
| C | 0.8451480  | -0.6062150 | 0.6684570  |
| H | 0.2082270  | -1.2718520 | 1.2583490  |
| H | 1.6144510  | -0.2322350 | 1.3552210  |
| H | 2.1235390  | -2.2195410 | -0.0510910 |
| C | 0.8452750  | 1.8237980  | -0.0900000 |
| H | 1.2516350  | 2.2062710  | 0.8535740  |
| H | 1.6991860  | 1.6415430  | -0.7525130 |
| H | 0.2301650  | 2.6075990  | -0.5399220 |
| C | 0.0548530  | 0.5643020  | 0.1391730  |
| C | -1.2555570 | 0.5111820  | -0.1590160 |
| H | -1.7190210 | 1.4140280  | -0.5585200 |
| C | -2.1764060 | -0.6618190 | -0.0126690 |
| H | -3.0167830 | -0.4193930 | 0.6471350  |
| H | -2.6045830 | -0.9399040 | -0.9820550 |
| H | -1.6740370 | -1.5420950 | 0.3915240  |

| 2-methylpropene (60)   |            |            |            |
|------------------------|------------|------------|------------|
| C                      | 0.0000000  | 1.2726840  | -0.6788030 |
| H                      | 0.8802110  | 1.3235440  | -1.3295910 |
| H                      | -0.8802110 | 1.3235440  | -1.3295910 |
| H                      | 0.0000000  | 2.1530400  | -0.0315830 |
| C                      | 0.0000000  | 0.0000000  | 0.1195860  |
| C                      | 0.0000000  | 0.0000000  | 1.4588050  |
| H                      | 0.0000000  | -0.9243020 | 2.0284090  |
| H                      | 0.0000000  | 0.9243020  | 2.0284090  |
| C                      | 0.0000000  | -1.2726840 | -0.6788030 |
| H                      | -0.8802110 | -1.3235440 | -1.3295910 |
| H                      | 0.8802110  | -1.3235440 | -1.3295910 |
| H                      | 0.0000000  | -2.1530400 | -0.0315830 |
| 2-methyl-1-butene (61) |            |            |            |
| C                      | 2.0311400  | -0.0375560 | -0.0000010 |
| H                      | 2.1381110  | 0.5950820  | -0.8848050 |
| H                      | 2.1381000  | 0.5951100  | 0.8847840  |
| H                      | 2.8535940  | -0.7577860 | 0.0000160  |
| C                      | 0.6911370  | -0.7603540 | 0.0000010  |
| H                      | 0.6352260  | -1.4266690 | -0.8721260 |
| H                      | 0.6352270  | -1.4266660 | 0.8721310  |
| C                      | -0.5358710 | 0.1156790  | 0.0000000  |
| C                      | -0.4927560 | 1.4546590  | 0.0000010  |
| H                      | 0.4388110  | 2.0086850  | 0.0000030  |
| H                      | -1.4046510 | 2.0441140  | -0.0000020 |
| C                      | -1.8427440 | -0.6283820 | -0.0000010 |
| H                      | -1.9225660 | -1.2761060 | -0.8803670 |
| H                      | -1.9225890 | -1.2760620 | 0.8803960  |
| H                      | -2.6946900 | 0.0560290  | -0.0000290 |
| 2-methyl-2-butene (62) |            |            |            |
| C                      | -0.6343900 | 1.4515100  | 0.0000000  |
| H                      | -1.2092200 | 1.7634970  | -0.8796020 |
| H                      | 0.3063370  | 2.0028430  | -0.0000010 |
| H                      | -1.2092190 | 1.7634970  | 0.8796030  |
| C                      | -0.4489580 | -0.0400200 | 0.0000010  |
| C                      | 0.7371810  | -0.6726370 | -0.0000010 |
| H                      | 0.7177000  | -1.7630900 | 0.0000010  |
| C                      | 2.1096280  | -0.0714920 | 0.0000000  |
| H                      | 2.6748560  | -0.3983000 | 0.8796690  |
| H                      | 2.6748620  | -0.3983150 | -0.8796590 |
| H                      | 2.0952230  | 1.0191800  | -0.0000090 |
| C                      | -1.7336310 | -0.8226050 | 0.0000000  |
| H                      | -2.3402790 | -0.5789680 | 0.8801160  |
| H                      | -2.3402820 | -0.5789620 | -0.8801130 |
| H                      | -1.5489620 | -1.8999240 | -0.0000040 |

| isobutane (63)  |            |            |            |
|-----------------|------------|------------|------------|
| C               | 0.0000000  | 0.0000000  | 0.3768780  |
| H               | 0.0000000  | 0.0000000  | 1.4751700  |
| C               | 0.0000000  | 1.4502890  | -0.0962170 |
| H               | 0.0000000  | 1.4941240  | -1.1908320 |
| H               | -0.8854710 | 1.9847420  | 0.2613270  |
| H               | 0.8854710  | 1.9847420  | 0.2613270  |
| C               | -1.2559870 | -0.7251450 | -0.0962170 |
| H               | -1.2939490 | -0.7470620 | -1.1908320 |
| H               | -1.2761010 | -1.7592110 | 0.2613270  |
| H               | -2.1615720 | -0.2255310 | 0.2613270  |
| C               | 1.2559870  | -0.7251450 | -0.0962170 |
| H               | 2.1615720  | -0.2255310 | 0.2613270  |
| H               | 1.2761010  | -1.7592110 | 0.2613270  |
| H               | 1.2939490  | -0.7470620 | -1.1908320 |
| isopentane (64) |            |            |            |
| C               | 1.7403960  | -0.7972030 | -0.0034770 |
| H               | 1.9039290  | -0.8182640 | 1.0795230  |
| H               | 1.6616350  | -1.8316790 | -0.3518130 |
| H               | 2.6250640  | -0.3500710 | -0.4672640 |
| C               | 0.4797900  | -0.0032440 | -0.3357900 |
| H               | 0.3529980  | -0.0057290 | -1.4281790 |
| C               | -0.7502440 | -0.6778070 | 0.2751590  |
| H               | -0.7601770 | -1.7299030 | -0.0362380 |
| H               | -0.6405010 | -0.6827910 | 1.3681410  |
| C               | -2.0807560 | -0.0354060 | -0.1046870 |
| H               | -2.1898360 | 0.0173700  | -1.1925540 |
| H               | -2.9204920 | -0.6165890 | 0.2868550  |
| H               | -2.1703250 | 0.9788400  | 0.2912470  |
| C               | 0.6295590  | 1.4451750  | 0.1217870  |
| H               | -0.2198750 | 2.0628190  | -0.1800330 |
| H               | 0.7118800  | 1.4921500  | 1.2135690  |
| H               | 1.5332280  | 1.8947550  | -0.3012090 |

| H <sub>2</sub> (65) |           |           |            |
|---------------------|-----------|-----------|------------|
| H                   | 0.0000000 | 0.0000000 | 0.3687610  |
| H                   | 0.0000000 | 0.0000000 | -0.3687610 |

### B3LYP/6-31G(d) Optimized Structures (Polyynes)

| C <sub>6</sub> H <sub>2</sub> |           |           |            |
|-------------------------------|-----------|-----------|------------|
| H                             | 0.0000000 | 0.0000000 | 4.2528560  |
| C                             | 0.0000000 | 0.0000000 | 3.1863020  |
| C                             | 0.0000000 | 0.0000000 | 1.9714600  |
| C                             | 0.0000000 | 0.0000000 | 0.6116500  |
| C                             | 0.0000000 | 0.0000000 | -0.6116500 |
| C                             | 0.0000000 | 0.0000000 | -1.9714600 |
| C                             | 0.0000000 | 0.0000000 | -3.1863020 |
| H                             | 0.0000000 | 0.0000000 | -4.2528560 |

| C <sub>8</sub> H <sub>2</sub> |           |           |            |
|-------------------------------|-----------|-----------|------------|
| H                             | 0.0000000 | 0.0000000 | 5.5405530  |
| C                             | 0.0000000 | 0.0000000 | 4.4743010  |
| C                             | 0.0000000 | 0.0000000 | 3.2585650  |
| C                             | 0.0000000 | 0.0000000 | 1.9014480  |
| C                             | 0.0000000 | 0.0000000 | 0.6742510  |
| C                             | 0.0000000 | 0.0000000 | -0.6742510 |
| C                             | 0.0000000 | 0.0000000 | -1.9014480 |
| C                             | 0.0000000 | 0.0000000 | -3.2585650 |
| C                             | 0.0000000 | 0.0000000 | -4.4743010 |
| H                             | 0.0000000 | 0.0000000 | -5.5405530 |

| C <sub>10</sub> H <sub>2</sub> |           |           |            |
|--------------------------------|-----------|-----------|------------|
| H                              | 0.0000000 | 0.0000000 | 6.8275170  |
| C                              | 0.0000000 | 0.0000000 | 5.7608740  |
| C                              | 0.0000000 | 0.0000000 | 4.5448920  |
| C                              | 0.0000000 | 0.0000000 | 3.1891070  |
| C                              | 0.0000000 | 0.0000000 | 1.9603580  |
| C                              | 0.0000000 | 0.0000000 | 0.6158630  |
| C                              | 0.0000000 | 0.0000000 | -0.6158630 |
| C                              | 0.0000000 | 0.0000000 | -1.9603580 |
| C                              | 0.0000000 | 0.0000000 | -3.1891070 |
| C                              | 0.0000000 | 0.0000000 | -4.5448920 |
| C                              | 0.0000000 | 0.0000000 | -5.7608740 |
| H                              | 0.0000000 | 0.0000000 | -6.8275170 |

| C <sub>12</sub> H <sub>2</sub> |           |           |            |
|--------------------------------|-----------|-----------|------------|
| H                              | 0.0000000 | 0.0000000 | 8.1139060  |
| C                              | 0.0000000 | 0.0000000 | 7.0472530  |
| C                              | 0.0000000 | 0.0000000 | 5.8309650  |
| C                              | 0.0000000 | 0.0000000 | 4.4757040  |
| C                              | 0.0000000 | 0.0000000 | 3.2463530  |
| C                              | 0.0000000 | 0.0000000 | 1.9034950  |
| C                              | 0.0000000 | 0.0000000 | 0.6701380  |
| C                              | 0.0000000 | 0.0000000 | -0.6701380 |
| C                              | 0.0000000 | 0.0000000 | -1.9034950 |
| C                              | 0.0000000 | 0.0000000 | -3.2463530 |
| C                              | 0.0000000 | 0.0000000 | -4.4757040 |
| C                              | 0.0000000 | 0.0000000 | -5.8309650 |
| C                              | 0.0000000 | 0.0000000 | -7.0472530 |
| H                              | 0.0000000 | 0.0000000 | -8.1139060 |

| C <sub>14</sub> H <sub>2</sub> |           |           |            |
|--------------------------------|-----------|-----------|------------|
| H                              | 0.0000000 | 0.0000000 | 9.3999140  |
| C                              | 0.0000000 | 0.0000000 | 8.3332280  |
| C                              | 0.0000000 | 0.0000000 | 7.1168330  |
| C                              | 0.0000000 | 0.0000000 | 5.7619270  |
| C                              | 0.0000000 | 0.0000000 | 4.5321950  |
| C                              | 0.0000000 | 0.0000000 | 3.1902400  |
| C                              | 0.0000000 | 0.0000000 | 1.9559570  |
| C                              | 0.0000000 | 0.0000000 | 0.6177040  |
| C                              | 0.0000000 | 0.0000000 | -0.6177040 |
| C                              | 0.0000000 | 0.0000000 | -1.9559570 |
| C                              | 0.0000000 | 0.0000000 | -3.1902400 |
| C                              | 0.0000000 | 0.0000000 | -4.5321950 |
| C                              | 0.0000000 | 0.0000000 | -5.7619270 |
| C                              | 0.0000000 | 0.0000000 | -7.1168330 |
| C                              | 0.0000000 | 0.0000000 | -8.3332280 |
| H                              | 0.0000000 | 0.0000000 | -9.3999140 |

| C <sub>16</sub> H <sub>2</sub> |           |           |             |
|--------------------------------|-----------|-----------|-------------|
| H                              | 0.0000000 | 0.0000000 | 10.6856990  |
| C                              | 0.0000000 | 0.0000000 | 9.6189880   |
| C                              | 0.0000000 | 0.0000000 | 8.4025350   |
| C                              | 0.0000000 | 0.0000000 | 7.0478420   |
| C                              | 0.0000000 | 0.0000000 | 5.8178970   |
| C                              | 0.0000000 | 0.0000000 | 4.4764540   |
| C                              | 0.0000000 | 0.0000000 | 3.2416720   |
| C                              | 0.0000000 | 0.0000000 | 1.9044880   |
| C                              | 0.0000000 | 0.0000000 | 0.6680300   |
| C                              | 0.0000000 | 0.0000000 | -0.6680300  |
| C                              | 0.0000000 | 0.0000000 | -1.9044880  |
| C                              | 0.0000000 | 0.0000000 | -3.2416720  |
| C                              | 0.0000000 | 0.0000000 | -4.4764540  |
| C                              | 0.0000000 | 0.0000000 | -5.8178970  |
| C                              | 0.0000000 | 0.0000000 | -7.0478420  |
| C                              | 0.0000000 | 0.0000000 | -8.4025350  |
| C                              | 0.0000000 | 0.0000000 | -9.6189880  |
| H                              | 0.0000000 | 0.0000000 | -10.6856990 |

| C <sub>18</sub> H <sub>2</sub> |           |           |             |
|--------------------------------|-----------|-----------|-------------|
| H                              | 0.0000000 | 0.0000000 | 11.9708160  |
| C                              | 0.0000000 | 0.0000000 | 10.9040760  |
| C                              | 0.0000000 | 0.0000000 | 9.6875050   |
| C                              | 0.0000000 | 0.0000000 | 8.3332120   |
| C                              | 0.0000000 | 0.0000000 | 7.1029210   |
| C                              | 0.0000000 | 0.0000000 | 5.7621980   |
| C                              | 0.0000000 | 0.0000000 | 4.5268160   |
| C                              | 0.0000000 | 0.0000000 | 3.1907350   |
| C                              | 0.0000000 | 0.0000000 | 1.9533430   |
| C                              | 0.0000000 | 0.0000000 | 0.6189780   |
| C                              | 0.0000000 | 0.0000000 | -0.6189780  |
| C                              | 0.0000000 | 0.0000000 | -1.9533430  |
| C                              | 0.0000000 | 0.0000000 | -3.1907350  |
| C                              | 0.0000000 | 0.0000000 | -4.5268160  |
| C                              | 0.0000000 | 0.0000000 | -5.7621980  |
| C                              | 0.0000000 | 0.0000000 | -7.1029210  |
| C                              | 0.0000000 | 0.0000000 | -8.3332120  |
| C                              | 0.0000000 | 0.0000000 | -9.6875050  |
| C                              | 0.0000000 | 0.0000000 | -10.9040760 |
| H                              | 0.0000000 | 0.0000000 | -11.9708160 |

| C <sub>20</sub> H <sub>2</sub> |           |           |             |
|--------------------------------|-----------|-----------|-------------|
| H                              | 0.0000000 | 0.0000000 | 13.2561020  |
| C                              | 0.0000000 | 0.0000000 | 12.1893520  |
| C                              | 0.0000000 | 0.0000000 | 10.9728000  |
| C                              | 0.0000000 | 0.0000000 | 9.6185930   |
| C                              | 0.0000000 | 0.0000000 | 8.3882830   |
| C                              | 0.0000000 | 0.0000000 | 7.0477240   |
| C                              | 0.0000000 | 0.0000000 | 5.8122480   |
| C                              | 0.0000000 | 0.0000000 | 4.4764810   |
| C                              | 0.0000000 | 0.0000000 | 3.2388430   |
| C                              | 0.0000000 | 0.0000000 | 1.9050880   |
| C                              | 0.0000000 | 0.0000000 | 0.6665940   |
| C                              | 0.0000000 | 0.0000000 | -0.6665940  |
| C                              | 0.0000000 | 0.0000000 | -1.9050880  |
| C                              | 0.0000000 | 0.0000000 | -3.2388430  |
| C                              | 0.0000000 | 0.0000000 | -4.4764810  |
| C                              | 0.0000000 | 0.0000000 | -5.8122480  |
| C                              | 0.0000000 | 0.0000000 | -7.0477240  |
| C                              | 0.0000000 | 0.0000000 | -8.3882830  |
| C                              | 0.0000000 | 0.0000000 | -9.6185930  |
| C                              | 0.0000000 | 0.0000000 | -10.9728000 |
| C                              | 0.0000000 | 0.0000000 | -12.1893520 |
| H                              | 0.0000000 | 0.0000000 | -13.2561020 |

| C <sub>22</sub> H <sub>2</sub> |           |           |             |
|--------------------------------|-----------|-----------|-------------|
| H                              | 0.0000000 | 0.0000000 | 14.5412790  |
| C                              | 0.0000000 | 0.0000000 | 13.4745110  |
| C                              | 0.0000000 | 0.0000000 | 12.2579570  |
| C                              | 0.0000000 | 0.0000000 | 10.9038380  |
| C                              | 0.0000000 | 0.0000000 | 9.6734700   |
| C                              | 0.0000000 | 0.0000000 | 8.3330920   |
| C                              | 0.0000000 | 0.0000000 | 7.0974800   |
| C                              | 0.0000000 | 0.0000000 | 5.7620240   |
| C                              | 0.0000000 | 0.0000000 | 4.5241380   |
| C                              | 0.0000000 | 0.0000000 | 3.1908900   |
| C                              | 0.0000000 | 0.0000000 | 1.9519710   |
| C                              | 0.0000000 | 0.0000000 | 0.6196090   |
| C                              | 0.0000000 | 0.0000000 | -0.6196090  |
| C                              | 0.0000000 | 0.0000000 | -1.9519710  |
| C                              | 0.0000000 | 0.0000000 | -3.1908900  |
| C                              | 0.0000000 | 0.0000000 | -4.5241380  |
| C                              | 0.0000000 | 0.0000000 | -5.7620240  |
| C                              | 0.0000000 | 0.0000000 | -7.0974800  |
| C                              | 0.0000000 | 0.0000000 | -8.3330920  |
| C                              | 0.0000000 | 0.0000000 | -9.6734700  |
| C                              | 0.0000000 | 0.0000000 | -10.9038380 |
| C                              | 0.0000000 | 0.0000000 | -12.2579570 |
| C                              | 0.0000000 | 0.0000000 | -13.4745110 |
| H                              | 0.0000000 | 0.0000000 | -14.5412790 |

| C <sub>24</sub> H <sub>2</sub> |           |           |             |
|--------------------------------|-----------|-----------|-------------|
| H                              | 0.0000000 | 0.0000000 | 15.8277700  |
| C                              | 0.0000000 | 0.0000000 | 14.7609990  |
| C                              | 0.0000000 | 0.0000000 | 13.5444820  |
| C                              | 0.0000000 | 0.0000000 | 12.1901090  |
| C                              | 0.0000000 | 0.0000000 | 10.9598960  |
| C                              | 0.0000000 | 0.0000000 | 9.6191500   |
| C                              | 0.0000000 | 0.0000000 | 8.3837500   |
| C                              | 0.0000000 | 0.0000000 | 7.0479120   |
| C                              | 0.0000000 | 0.0000000 | 5.8102270   |
| C                              | 0.0000000 | 0.0000000 | 4.4766630   |
| C                              | 0.0000000 | 0.0000000 | 3.2378720   |
| C                              | 0.0000000 | 0.0000000 | 1.9053540   |
| C                              | 0.0000000 | 0.0000000 | 0.6661050   |
| C                              | 0.0000000 | 0.0000000 | -0.6661050  |
| C                              | 0.0000000 | 0.0000000 | -1.9053540  |
| C                              | 0.0000000 | 0.0000000 | -3.2378720  |
| C                              | 0.0000000 | 0.0000000 | -4.4766630  |
| C                              | 0.0000000 | 0.0000000 | -5.8102270  |
| C                              | 0.0000000 | 0.0000000 | -7.0479120  |
| C                              | 0.0000000 | 0.0000000 | -8.3837500  |
| C                              | 0.0000000 | 0.0000000 | -9.6191500  |
| C                              | 0.0000000 | 0.0000000 | -10.9598960 |
| C                              | 0.0000000 | 0.0000000 | -12.1901090 |
| C                              | 0.0000000 | 0.0000000 | -13.5444820 |
| C                              | 0.0000000 | 0.0000000 | -14.7609990 |
| H                              | 0.0000000 | 0.0000000 | -15.8277700 |

|                                |           |           |             |
|--------------------------------|-----------|-----------|-------------|
| C <sub>26</sub> H <sub>2</sub> |           |           |             |
| H                              | 0.0000000 | 0.0000000 | 17.1126710  |
| C                              | 0.0000000 | 0.0000000 | 16.0458970  |
| C                              | 0.0000000 | 0.0000000 | 14.8294200  |
| C                              | 0.0000000 | 0.0000000 | 13.4751250  |
| C                              | 0.0000000 | 0.0000000 | 12.2448390  |
| C                              | 0.0000000 | 0.0000000 | 10.9043790  |
| C                              | 0.0000000 | 0.0000000 | 9.6687990   |
| C                              | 0.0000000 | 0.0000000 | 8.3332760   |
| C                              | 0.0000000 | 0.0000000 | 7.0954030   |
| C                              | 0.0000000 | 0.0000000 | 5.7621680   |
| C                              | 0.0000000 | 0.0000000 | 4.5231460   |
| C                              | 0.0000000 | 0.0000000 | 3.1910530   |
| C                              | 0.0000000 | 0.0000000 | 1.9514760   |
| C                              | 0.0000000 | 0.0000000 | 0.6198720   |
| C                              | 0.0000000 | 0.0000000 | -0.6198720  |
| C                              | 0.0000000 | 0.0000000 | -1.9514760  |
| C                              | 0.0000000 | 0.0000000 | -3.1910530  |
| C                              | 0.0000000 | 0.0000000 | -4.5231460  |
| C                              | 0.0000000 | 0.0000000 | -5.7621680  |
| C                              | 0.0000000 | 0.0000000 | -7.0954030  |
| C                              | 0.0000000 | 0.0000000 | -8.3332760  |
| C                              | 0.0000000 | 0.0000000 | -9.6687990  |
| C                              | 0.0000000 | 0.0000000 | -10.9043790 |
| C                              | 0.0000000 | 0.0000000 | -12.2448390 |
| C                              | 0.0000000 | 0.0000000 | -13.4751250 |
| C                              | 0.0000000 | 0.0000000 | -14.8294200 |
| C                              | 0.0000000 | 0.0000000 | -16.0458970 |
| H                              | 0.0000000 | 0.0000000 | -17.1126710 |
